# Supplementary material for: Evolution and functional divergence of NLRP genes in mammalian reproductive systems
Source: PubMed Central journal article supplement (PMC2735741; doi:10.1186/1471-2148-9-202), 2009-08-14
Supplement: 1471-2148-9-202-S1.pdf [file 1471-2148-9-202-S1.pdf]

**Additional file 1: The phylogenetic tree of oocyte-specific *NLRPs* for DIVERGE analyses**

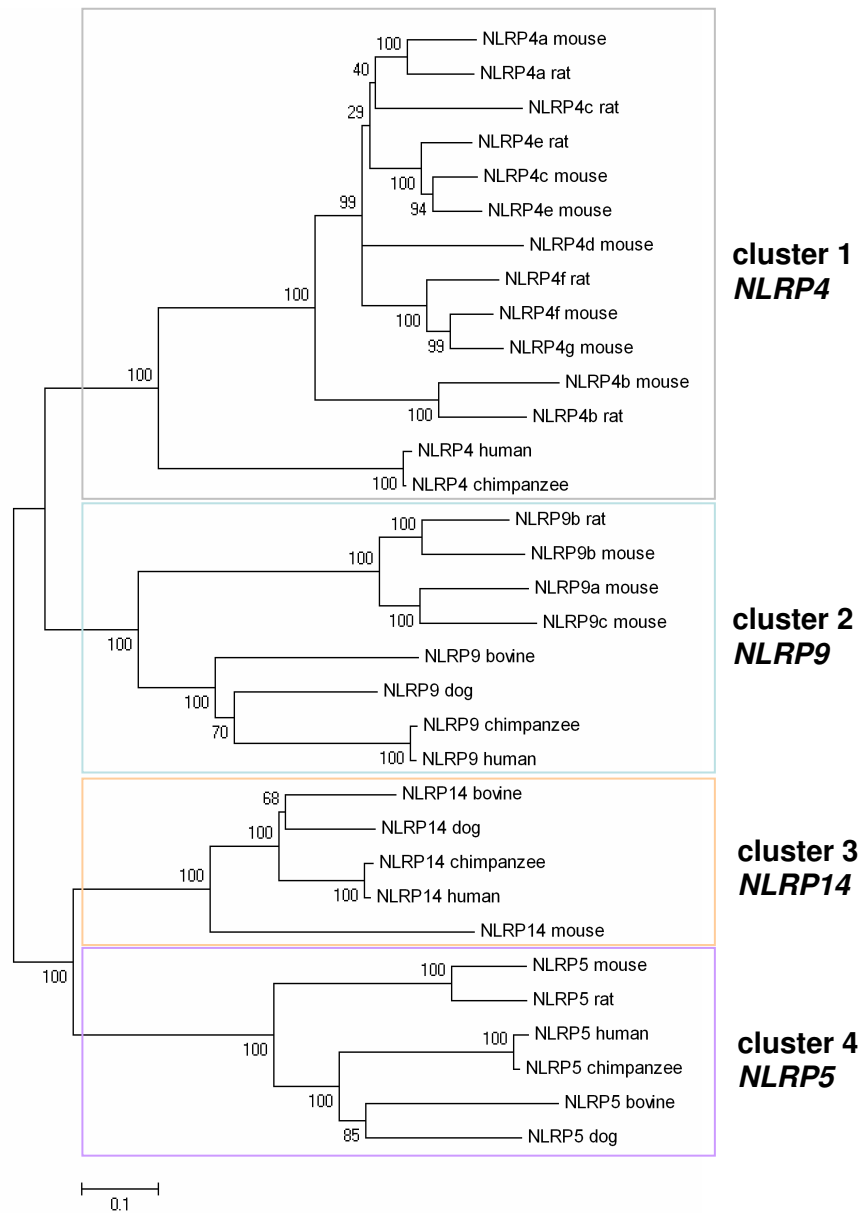

Figure S1 Phylogenetic tree of oocyte-specific *NLRPs* derived from amino acid sequences for DIVERGE analyses: Four oocyte-specific *NLRP* genes (*NLRP4*, *NLRP9*, *NLRP14* and *NLRP5*) are grouped into four clusters (cluster 1-4). Each gene (cluster) forms a monophyly with 100% bootstrap value.
