# Supplementary material for: Evolution and functional divergence of NLRP genes in mammalian reproductive systems
Source: PubMed Central journal article supplement (PMC2735741; doi:10.1186/1471-2148-9-202), 2009-08-14
Supplement: 1471-2148-9-202-S2.pdf [file 1471-2148-9-202-S2.pdf]

**Additional file 2: the *NLRP* sampling for all the analyses**

| Species                               | Gene Symbol    | Genomic Location       | Protein Accession Number<br>(*Gene Accession Number)* |
|---------------------------------------|----------------|------------------------|-------------------------------------------------------|
| human ( <i>Homo sapiens</i> )         | <i>NLRP1</i>   | 17p13.2                | NP_127497                                             |
|                                       | <i>NLRP2</i>   | 19q13.42               | NP_060322                                             |
|                                       | <i>NLRP3</i>   | 1q44                   | NP_004886                                             |
|                                       | <i>NLRP4</i>   | 19q13.42               | NP_604393                                             |
|                                       | <i>NLRP5</i>   | 19q13.42               | NP_703148                                             |
|                                       | <i>NLRP6</i>   | 11p15                  | NP_612202                                             |
|                                       | <i>NLRP7</i>   | 19q13.42               | NP_996611                                             |
|                                       | <i>NLRP8</i>   | 19q13.42               | NP_789781                                             |
|                                       | <i>NLRP9</i>   | 19q13.42               | NP_789790                                             |
|                                       | <i>NLRP10</i>  | 11p15.4                | NP_789791                                             |
|                                       | <i>NLRP11</i>  | 19q13.42               | NP_659444                                             |
|                                       | <i>NLRP12</i>  | 19q13.41               | NP_653288                                             |
|                                       | <i>NLRP13</i>  | 19q13.42               | NP_789780                                             |
|                                       | <i>NLRP14</i>  | 11q23.3                | NP_789792                                             |
| chimpanzee ( <i>Pan troglodytes</i> ) | <i>NLRP1</i>   | 17                     | XP_001167230                                          |
|                                       | <i>NLRP2</i>   | 19                     | XP_001175071                                          |
|                                       | <i>NLRP3</i>   | 1                      | ENSPTRP00000003727                                    |
|                                       | <i>NLRP4</i>   | 19                     | XP_524404                                             |
|                                       | <i>NLRP5</i>   | 19                     | XP_001139299                                          |
|                                       | <i>NLRP6</i>   | 11                     | XP_521701                                             |
|                                       | <i>NLRP7</i>   | 19                     | XP_512902                                             |
|                                       | <i>NLRP8</i>   | 19                     | XP_512922                                             |
|                                       | <i>NLRP9</i>   | 19                     | ENSPTRP00000019820                                    |
|                                       | <i>NLRP10</i>  | 11                     | ENSPTRP00000005809                                    |
|                                       | <i>NLRP11</i>  | 19                     | XP_524402                                             |
|                                       | <i>NLRP12</i>  | 19                     | XP_524387                                             |
|                                       | <i>NLRP13</i>  | 19                     | XP_524405                                             |
|                                       | <i>NLRP14</i>  | 11                     | XP_521822                                             |
| mouse ( <i>Mus musculus</i> )         | <i>Nlrp1a</i>  | 11B4                   | NP_001004142                                          |
|                                       | <i>Nlrp1b</i>  | 11B4                   | NP_001035786                                          |
|                                       | <i>Nlrp1c</i>  | 11B4                   | NP_001034323                                          |
|                                       | <i>Nlrp2</i>   | 7A1                    | NP_808358                                             |
|                                       | <i>Nlrp3</i>   | 11B1.3                 | NP_665826                                             |
|                                       | <i>Nlrp4a</i>  | 7A3                    | NP_766484 (*NM_172896)                                |
|                                       | <i>Nlrp4b</i>  | 7A1                    | NP_766069 (*NM_172481)                                |
|                                       | <i>Nlrp4c</i>  | 7A1                    | NP_113566 (*NM_031389)                                |
|                                       | <i>Nlrp4d</i>  | 7A1                    | NP_001481360 (*XM_001481310)                          |
|                                       | <i>Nlrp4e</i>  | 7A3                    | NP_001004194 (*NM_001004194)                          |
|                                       | <i>Nlrp4f</i>  | 13B3                   | NP_780499 (*NM_175290)                                |
|                                       | <i>Nlrp4g</i>  | 9                      | NP_001004145 (*NM_001004145)                          |
|                                       | <i>ΨNlrp4h</i> | 7A3                    | (*XR_035705)                                          |
|                                       | <i>ΨNlrp4i</i> | 7A3                    | (*XR_034113)                                          |
|                                       | <i>ΨNlrp4j</i> | 7A3                    | (*XR_034766)                                          |
| <i>ΨNlrp4k</i>                        | 7A3            | (*XR_035707)           |                                                       |
| <i>ΨNlrp4l</i>                        | 7A3            | (*XR_035708)           |                                                       |
| <i>ΨNlrp4m</i>                        | 7A3            | (*XR_034805)           |                                                       |
| <i>Nlrp5</i>                          | 7A3            | NP_035990 (*NM_011860) |                                                       |

| species                          | Gene Symbol                      | Genomic Location | Protein Sequence             |
|----------------------------------|----------------------------------|------------------|------------------------------|
| mouse ( <i>Mus musculus</i> )    | <i>Nlrp6</i>                     | 7F5              | NP_001074858                 |
|                                  | <i>Nlrp9a</i>                    | 7A3              | NP_001041684 (*NM_001048219) |
|                                  | <i>Nlrp9b</i>                    | 7A3              | NP_918947 (*NM_194058)       |
|                                  | <i>Nlrp9c</i>                    | 7A3              | NP_001036077 (*NM_110142612) |
|                                  | <i>Nlrp10</i>                    | 7E3              | NP_780741                    |
|                                  | <i>Nlrp12</i>                    | 7A1              | Q08EE9                       |
|                                  | <i>Nlrp14</i>                    | 7E3              | NP_001002894                 |
|                                  | Rat ( <i>Rattus norvegicus</i> ) | <i>Nlrp1</i>     | 10q24                        |
| <i>Nlrp2</i>                     |                                  | 1                | XP_001070923                 |
| <i>Nlrp3</i>                     |                                  | 10q22            | XP_220513                    |
| <i>Nlrp4a</i>                    |                                  | 1q12             | NP_001099690                 |
| <i>Nlrp4b</i>                    |                                  | 1q21             | XP_344857                    |
| <i>Nlrp4c</i>                    |                                  | 7q11             | XP_234957                    |
| <i>Nlrp4d</i>                    |                                  | 11q12            | ENSRNOP000000051463          |
| <i>Nlrp4e</i>                    |                                  | 1q12             | XP_574350                    |
| <i>Nlrp4f</i>                    |                                  | 1q12             | XP_001076792                 |
| <i>Nlrp5</i>                     |                                  | 1q12             | NP_001100944                 |
| <i>Nlrp6</i>                     |                                  | 1q41             | XP_577848                    |
| <i>Nlrp9a</i>                    |                                  | 1q12             | XP_218250                    |
| <i>Nlrp9b</i>                    |                                  | 1q12             | XP_218248                    |
| <i>Nlrp10</i>                    |                                  | 1q33             | NP_001099761                 |
| <i>Nlrp12</i>                    |                                  | 1q12             | XP_218181                    |
| <i>Nlrp14</i>                    |                                  | 1q33             | ENSRNOP000000040262          |
| bovine ( <i>Bos taurus</i> )     | <i>NLRP1</i>                     | 19               | ENSBTAP000000027232          |
|                                  | <i>NLRP3</i>                     | 7                | XP_581687                    |
|                                  | <i>NLRP5</i>                     | 18               | NP_001007815                 |
|                                  | <i>NLRP6</i>                     | Un.004.137       | XP_581339                    |
|                                  | <i>NLRP8</i>                     | 18               | XP_582571                    |
|                                  | <i>NLRP9</i>                     | 18               | NP_001019835                 |
|                                  | <i>NLRP13</i>                    | 18               | XP_608304                    |
|                                  | <i>NLRP14</i>                    | 15               | ENSBTAP00000002954           |
| dog ( <i>Canis familiaris</i> )  | <i>NLRP1</i>                     | 5                | ENSCAFP000000022816          |
|                                  | <i>NLRP2</i>                     | 1                | ENSCAFP00000003831           |
|                                  | <i>NLRP3</i>                     | 8                | XP_848377                    |
|                                  | <i>NLRP5</i>                     | 1                | XP_533576                    |
|                                  | <i>NLRP6</i>                     | 18               | ENSCAFP00000009685           |
|                                  | <i>NLRP8</i>                     | 1                | XP_853947                    |
|                                  | <i>NLRP9</i>                     | 1                | XP_533578                    |
|                                  | <i>NLRP10</i>                    | 21               | XP_854074                    |
| chicken ( <i>Gallus gallus</i> ) | <i>NLRP12</i>                    | 1                | ENSCAFP00000003989           |
|                                  | <i>NLRP13</i>                    | 1                | XP_541402                    |
|                                  | <i>NLRP14</i>                    | 21               | XP_542482                    |
|                                  | <i>NLRP3</i>                     | 5                | Q5F3J4                       |

UN: genomic location is unknown. \* gene sequences used in the analysis of mouse segmental duplication (Fig. 2a).
