# Supplementary material for: Evolution and functional divergence of NLRP genes in mammalian reproductive systems
Source: PubMed Central journal article supplement (PMC2735741; doi:10.1186/1471-2148-9-202), 2009-08-14
Supplement: 1471-2148-9-202-S3.pdf [file 1471-2148-9-202-S3.pdf]

KAL-----  
-----CRALTL PNSALHSL SLEACQLTGACCKDLASTFTRYKCLRRINLAKN  
SLGFSGLFVLCAMKDQCTCTLYELKLRMADFSDSQEFLSEMERNKILSIENGV-----  
-----  
-----  
-----  
-----  
-----

#NLRP4c\_mouse "Q3TKR3|NAL4C\_MOUSE NACHT, LRR and PYD domains-containing protein  
4C - Mus musculus"

-----MASFFSDFGLMWYLEELNKKEFMKFKEFLKQEILQL  
RLKQIS-----WTEVKKASREDLANLLLKHYEKKAWDMTFKIFQKMNKDLMERAGR  
EIAG-----  
-----HSKLYQAHLKK  
KLTHDYARKFNKIVQDFSKQKFTQDDYDRFENFLISKVTAKKPHM--VFLQGAAGIGKSL  
MLTKLMLAWSEGVMFQNKFSYIFYFCCQDVK-KMKRASLAELISKEWPKTSAPIEDILSQ  
PEKLLFVIDNLEVMCEDMS----ERESELCDTCTEKQPVRI LLSLLRRKMLPKSSFLIS  
ATPETFEKMEGRVECTNVKIVTGFNESNIKMYFRSLFQDKT-----KTQEIFSLVK  
ENQQLFTVCQVPVLCWMVATCLKKEIEKGRDLVSVCRRTTSLYTTHIFNLFIPQSAQ--Y  
PSKESQAQLQSLCSLAAEGMWT-DTFVFGEEALRRNGIMSDIPTLLDVRILEKSKK-SE  
KSYIFLHPSIQEVCAAIFYLLKSHMDHPSQDVKS-----IEALIFT-FLKKVKVQW  
IFFGSI FGLLHESEQKLEAFFGHQLSQEIKRQLYQCLETISGN-----  
-----EELQEQVDGMKLFYCLFEMDDEAF LAQAMNCME-----  
-QINFAVDYSDVIVAA-HCLQHCSTLKKLSLSTQN-----VLSEGQEH-----  
-----YTEKLLMCWHMCSVLISSKDIYILQVKNTNLNETASLVLYSHLMYP-----SC  
TLKALVNNVTFLCDNRLFFELIQNQ-CLQHLDLNLTFLSH-GDVKLLCDVLSQEECNIE  
KLM-----VAACNLSPDDCKVFASVLISSKMLKHLNLSNNL-D  
KGISSLSKALCHPDCVLKNLVLVNC SLSEQWDYLSEVLRNKTNLHLDISSNDLKDEGL  
KVL-----  
-----CGALSLPDSVLKSLSVRYCLITTSQCQDLAEVLRKNQNLRLNLOVSNN  
KIEDAGVKLLCDAIKHPNCHLENIGLEACALTGACCEDLASAFTHCKTLWGINLQENALD  
HSLGIVLFEALKQQCTLHVGLGRITDFDKETQELLMAEEEKNPHLSILSSV-----  
-----  
-----  
-----

#NLRP4d\_mouse "Q66X24|Q66X24\_MOUSE NALP-beta (Fragment) - Mus musculus"

-----MASFFSDVGLMWYLEELNRKEFIKFKEFLKQEILQL  
GLKQIS-----WTEVKKASRKDLNQLKH YGEKQTWDMTFNIFQKLNKELIEGAER  
EIAG-----  
-----HPKLYRAHLKT  
KVTHYGFRAFNISIQDFFRKEFTKDDFDYFEDLFLSKRTEMKPHVREVFLYGVAGIGKTL  
LLKFMFAWLEGLVIQDKFSYIFYFCCQDLK-QLKTASLADLISSECPNPSAPIEEILSQ  
PEKLLFIIDSLEWIECDLS----EQESELCDNCMEKKPVNIQISSLLRGKILPQSSLLIS  
ATPR-FEKMQDMIECTDVKI IKGFKESNINMYFHIMIRDNN-----KVHEAFLVR-  
ENEQLFTICQAPVLCWMVITCLKNEIEKGRDPVSICQSTTSLYTTHIFNLFIPQSAQ--Y  
PSKESQAQLQSLCSLATEGMWT-GTFMFSEEALRRNGTMSDIPTLLDIGMLHDG-----  
-----HPSQHVKC-----IETLMFM-FLKKVKVQW  
VFWG-FIFGLLHRALEEKLEIFFGYSLSKKIKDKLCQCLKTISRN-----  
-----KSLQEEIDGMK-FFCLFELDDEAFVQAMNCME-----  
-QIRFVTKDYSDIIIAA-YCLKHCSKLLKLSFSTEN-----VLIEELDQS-----  
-----YMEKVLDCWNHMC SGFTRSKDIKVLQIKDTHFKEQVFQVLFESLRYP-----SF  
TLKELMVNNVTFYDGEHMFELIQNC-SLECLNLLSLLSP-SDVELLCKILIQSECKME

K-----VAHCKLSPDDCKSFVFLMRSKSLKDLNLACNNL-G  
QGISSLCKALCHQDCILKYLVLNCSLSEQWDYLSDVLSQNKTLRHLEISVNDLKDEGL  
KIL-----  
-----CKALTVLES-----LSMVHCFITSSGCQDLAEVLRKKQKLCCLDVSNN  
KLED SGVKLLCEAMEHPNCHLEDLGLDDCDITGASSENLSAFIQCKALKNINLNGNVFE  
VSEMFVSDMLKQKHSRLIFG-LRITDFDNESPAFLVFEEKKN-----  
-----  
-----  
-----

#NLRP4e\_mouse "gi|51921379|ref|NP\_001004194.1| NLR family, pyrin domain  
containing 4E [Mus musculus]"

-----MASFFSDFGLMWYLEELNKKEFMKFKELLQQEILQL  
GLKHIS-----WTEVKKASREDLANLLLKHYYEKKAWDMTFKIFQKMNRRQDLMERAGR  
EIAG-----  
-----HSKLYQVHLKK  
KLTHDYARKFNIKDQDSLKQKFTQDDCDHFGNLLISKATGKKPHM--VFLQGVAGIGKSL  
MLTKLMLAWSEGVMFQNKFSYIFYFCCQDVK-KMKRASLAELISKEWPNASAPIEEILSQ  
PEKLLFVIDNLEVMCEDMS----EWESELCDDCEKQPVNLMSSLLRRKMLPESSFLVS  
ATPETFEKIEDRIECTNVKMMAGFNESSIKVYFYSLFQDRN-----RTQEIFSLVR  
ENEQLFSVCQVPVLCWMVATCLKKEIEKGRDPVSI CRRITSLYTTYIFNLFIPHSAQ--Y  
PSKKSQDQLQGLCSLAAEGMWT-DTFVFAEEALRRNGIMSDISTLLDVRILEKSKE-SE  
KSYIFLHPSIQEVCAAIFHLLKSHVDHPSQDVKS-----IEALIFT-FLKKVKIQW  
IFFGSFIFGLLHESEQKLEAFFGHQLSQEIKRQLYQCLETISGN-----  
-----KELQEIDGMKLFYCLFEMDDEAFLPQVMNCME-----  
-QIKFVAKDYSDVIVAA-HSLQHCSTLKKLSLSTQN-----ILSEGQEH-----  
-----YTEKLLICWHHVCVSVLTSSKDIHVLVQVKTDFNERAFLVLYSHLKYP-----SC  
ILKVLEVNNTLLCDNRLLFELIQNQ-RLQLLNLSTFLSH-NDVKLLCDVNLQAEENIE  
KLM-----VADCNLSRDDCKVFSVLISSKMLKHLNLSNNL-D  
KGISSLSKALCHPDCVLKLVAKCSLSEECWHYLSEVLRNRKTLTHLDISFNDLKDEGL  
KVL-----  
-----CGALTLPDSVLI SLSVRYCLITTSGCQDLAEVLRNNQNLRLNLQISNN  
KIEDAGVKLLCDAIKHPNCHLENIGLEACALTGACCEDLASSFTHCKTLLGINLQENALD  
HSGLVALFEAMKQQQCTVNLRLRITDFDKETQEFLEMAEKEKNPYLSI-----  
-----  
-----

#NLRP4f\_mouse "gi|140972011|ref|NP\_780499.3| NALP, kappa [Mus musculus]"

-----MASFISDFGLIWLRELNKKEFMKFKDFLIQEILEL  
KLKQVS-----STKVKKASREDLANLLKCGE-NQAWDMTFRILQKINRKDLTERATG  
AIVG-----  
-----NPNLYRDHLKK  
KLTHDCPKKFNRIQDFIKETFIQNDYDAFENLLISKGTERKPHM--VFLKGMAGVGKTL  
MLKNLMLAWSKGLVFQNKFSYAFYFCCQDVK-QLKTASLAELISREWPSAPSAPIEEILSQ  
PEKLLFIDSLEGMWDLT----KQSELCDDCEKQPVSTLLSSLLRRKMLPESSLLLS  
TTPETFEKMEDRIQCTDVKTATAFDEFSMKIYFHRLFQDRK-----RAQEAFLSLVR  
ENKQLFTICQVPLLCWMVATCLKEEIEKGGDPVSLCRRTTSLYTTTHIFSLFIPQSAQ--Y  
PSKKSQDQLQGLCSLAAEGMWT-DTFVFGKEALRRNGIFDSDIPTLLDIGMLGKIRE-FE  
NSYIFLHPSVQEVCAAIFYMLKRHVEHPSQDVKN-----IETVLFM-FLKKVKQW  
IFLGCIFGLLQKSEKLGVFFGHRLSKNIHKKLYQCLETLN-----  
-----AELQEIDGMRLFSCLFEMEDEAFLVKAMNCMQ-----  
-QINFAKNYSDFIVAA-YCLKHCSTLKKLSFSTEN-----VLNE-GDQS-----

-----YMEELLICWNNMCSVFVRSKDIQELRIKDTNFNPAIRVLYESLKYP-----SF  
TLNKLVANNSVFG-DNHVLFELIQNS-SLQYLDLSCSFLSH-NEVKLLCDILNQAECNIE  
KLM-----IAHCKLSPDDCKIFGSILMSSKSLKVLNLANNNL-N  
QGISSLCKALCHPHCTLEYLVLNSCSLSEQCWDYLSEVLRQNKTLSHLDISSNDLKDEGL  
KIL-----  
-----CRSLILPYCVLESCLSCCGITERGCQDLAEVLKNNQNLKYLHVSYN  
KLKDTGVMLLCDAIKHPNCHLKDQLQLEACEITDASNEELCYAFMQCETLQTLNLMGNAFE  
VSRMVFFPRF-----  
-----  
-----  
-----  
-----

#NLRP4g\_mouse "Q3UWL9|Q3UWL9\_MOUSE In vitro fertilized eggs cDNA, RIKEN full-length enriched library, clone:7420493B02 product:similar to PAN2 protein - Mus musculus"

-----MASFISDFGLMWYLKELNKKEFIKFKEFLIQEILKL  
KLKQIS-----WTEVKKASREDLANLLKCYEENQAWDMTFNILQKINRKDLTERATE  
EIADS-----  
-----SPLGLTDSGNPKLYRDHLKK  
KLTHDCSKKFNRIQDFIKEIFIQNDCTFENLLISKGTEKKPHM--VFLQGMAGIGKTM  
MLKNLMLAWSKGLVFQNKFSYTFYFCCRDKV-QLKTASLAELISREWSPSPAPIEEILSQ  
PEKLLFIIDSLEGMECDLT----KQESLDCNCEKQPVSISSLLTRKMLPESSFLLS  
TTPETFEMEDRILCTDVKTATAFDERSIKIYFHRLFQDKI-----RAQEAFSLVR  
ENEQLFTICQVPLLCWMVATCLKEEIEKGGDPVSVCRHITSLYTTHILNLFIPQSAQ--Y  
PSKKSQDQLQGLCSLAAEGMWT-DTFVFGEALRRNGILDSDIPTLLDIGMLGKIRE-FE  
NYYIFLHPSVQEVCAAFYLLKSHVDHPSQDVKS-----IETVLFM-FLKKVKTQW  
IFLGCIFIGLLQKSEQEKLVVFFGRRLSQIKHQKLYQCLETISGN-----  
-----AELQEIDGMKLFCCLEIEDEAFLVKVMNCMQ-----  
-QINFAKNYSDILILAA-YCLKHCSTLKKLSFSTQN-----VLNEKGNQR-----  
-----CMKKLIICWNDMCSVFVRSKDIQVLQIKDTNFNPAIRILYEYLKYP-----SF  
TLNKLVANNSVHFGDNHAFELIQNC-SLQYLDLGCFLTH-SEVKLLCDVNLQAECNIE  
KLV-----VSHCKLSPDDCKIFGSVLMSSKTLKVLNWAYNNL-N  
QGISLLCKAWCHPDCILEYLVLANCSLSEQCWDYLSEVLRQNKTLSHLDISSNDLKDKGL  
KIL-----  
-----CRALTLPYCALKSLYLNCCQITARGCQDLAKVLRNNQNLKCLHISNN  
KLKDALMLLCKAIKHPNCHLEDLRLEACEITGASNEDLRYAFMQCETLQMINLMGNALE  
IVDY-----  
-----  
-----  
-----  
-----

#NLRP4\_human "gi|19745162|ref|NP\_604393.1| NLR family, pyrin domain containing 4 [Homo sapiens]"

-----MAASFFSDFGLMWYLEELKKEEFRKFKEHLKQMTLQL  
ELKQIP-----WTEVKKASREELANLLIKHYEEQQAWNITLRIFQKMDRDKDLCMKVMR  
ERTG-----  
-----YTKTYQAHAKQ  
KFSRLWSSKSVTEIHLYFEEVQEECDHLDRLFAPKETGKQPRT--VIIQGPQGIGKTT  
LLMKLMAWSDNKIFRDRFLYTFYFCCRELR-ELPPTSLADLISREWDPDPAAPITEIVSQ  
PERLLFVIDSFEELQGGN----EPDSDLCGDLMEKRPVQVLLSSLLRKKMLPEASLLIA  
IKPVCPELRDQVTISEIYQPRGFNESDRLVYFCCFFKDPK-----RAMEAFNLVR  
ESEQLFSICQIPLLCWILCTSLKQEMQKGDALALTCQSTTSVYSSFFVFNLFTEGAE--G  
PTPQTQHQLKALCSLAAEGMWT-DTFEFCEDDLRRNGVVDADIPALLGTKILLKYGE-RE

SSYVFLHVCIQEFCAALFYLLKSHLDHPPAVRC-----VQELLVANFEKARRAHW  
IFLGCFLTGLLNKKEQEKLDAFFGFQLSQEIKQOIHQCLKSLGER-----  
-----GNPQGQVDSLAIIFYCLFEMQDPAFVKQAVNLLQ-----  
-EANFHIIDNVDLVVS-A-YCLKYCSSLRKLCSVQN-----VFKKEDEHSS-----  
-----TSDYSLICWHHICSVLTTSGHLRELQVQDSTLSESTFVTWCNQLRHP-----SC  
RLQKLGINNVSFSGQSVLLFEVLFYQPDLYLSFTLTKLSR-DDIRSLCDALNYPAGNVK  
ELA-----LVNCHLSPIDCEVLAGLLTNNKCLTYLNVSCNQL-D  
TGVPLLCEALCSPDTVLYLMLAFCHLSEQCEYISEMLLRNKSVRYLDLSANVLKDEGL  
KTL-----  
-----CEALKHPDCCLDSLCLVKCFITAAGCEDLASALISNQNLIKILQIGCN  
EIGDVGVLQLLCRALHTDCRLEILGLEECGLTSTCCKDLASVLTCSKTLQQLNLTNTLD  
HTGVVVLCEALRHPECALQVGLRKTDFDEETQALLTAEERNPNLITIDDCDTITRVEI  
-----  
-----  
-----  
-----

#NLRP4\_chimpanzee "gi|114679221|ref|XP\_524404.2| PREDICTED: NACHT, leucine rich repeat and PYD containing 4 isoform 4 [Pan troglodytes]"

-----MTLHL  
ELKQIP-----WTEVKKASREELANLLIKHYEEQQAWNITLRIFQKMDRDKLCKMVMR  
ERTG-----  
-----YTKTYQAHAKQ  
KFSRLWSSKSVTEIHLYFEEEVKQEECDHLDRLFAPKETGKQPRT--VIIQGPQGIGKTT  
LLMKLMAWSDNKIFRDRFLYTFYFCCRELR-ELPPTSLADLISREWPDPAAPITEIVSQ  
PERLLFVIDSFEELQGSN----EPDSDLCGDLMEKQPQVLLSLLRKKMLPEASLLIA  
VKPVCPKELQDQVTISEIYQPRGFNESDRLVYFCCFFKDPK-----RAMEAFNLVR  
ESEQLFSICQIPLLCWILCTSLKQEMQKGDALALTCQSTTSVYSSFVFNLFTEGAE--G  
PTPQSQHQLKALCSLAAEGMWT-DTFEFCEDDLRRNGVVDADIPALLGTKILLKYGE-RE  
SSYVFLHVCIQEFCAALFYLLKSHLDHPPAVRC-----VQELLVANFEKARRAHW  
IFLGCFLTGLLNKKEQEKLDAFFGFQLSQEIKQOFHQCLKSLGEH-----  
-----GNPQGQVDSLAIIFYCLFEMQDPAFVKQAVNLLQ-----  
-EANFHIIDNVDLVVS-A-YCLKYCSSLRKLCSVQN-----VFKKEDEHSS-----  
-----TSDYSLVCWHHICSVLTTSGHLRELQVQDSTLSESTFVTWCNQLRHP-----SC  
RLQKLGINNVSFSGQSVLLFEVLFYQPDLYLSFTLTKLSR-DDIRSLCDALNYPAGNVK  
ELG-----LVNCHLSPIDCEVLAGLLTNNKCLTYLNVSCNQL-D  
TGVPLLCEALCSPDTVLYLMLAFCHLSEQCCQYISEMLLHNKSVRYLDLSANVLKDEGL  
RTL-----  
-----CEALKHPDCCLDSLCLVKCFITAAGCEDLASALISNQNLIKILQVGCN  
EIGDVGVLQLLCRALHTPDCRLEILGLEECGLTSTCCKDLASVLTCSKTLQQLNLTNTLD  
RTGVVVLCEALRHPECALQVGLRKTDFDEETQALLTAEERNPNLITIDDCDTITRGRD  
LIARNLGSDSNTCKGQGLGPLLT-----  
-----  
-----  
-----

#NLRP4a\_rat "gi|109458051|ref|XP\_218188.4| PREDICTED: similar to NACHT, leucine rich repeat and PYD containing 4A [Rattus norvegicus]"

-----MASFFSDFGLMWYLEELNKKEFMKFKEFLKQEILQL  
GLKQVS-----WTEVKKASREDLASLLLKHYEEKQAWDMTFNFFQKINRKDLIKRAKR  
EIDG-----  
-----YPKLYRAHLKT  
KLTHDSSRIFNINIQDFLKEKFTKDDHDFETLLQSKGTESKPOV--VVLSGVAGIGKTL  
MLKRLMLAWIEGLVFPYKFSYIFYFCCQEVK-QLKTASLAE LISREWDPDPAPIEEILSE  
PEKLLFIIDSLEGIECDLF----KCDSELCDNCMEKQPVNILLSLLRKKMLLEASLLIS

TPPETFEKMEDRIEYTHVKIITGLNESDIKMCFHRLFQDRN-----RAQEAFSLVR  
ENEQMLTICQVPVLCWMVATCLKTEIEKGRNLVSTCRRTTSLYTTYIFNLFIPQSAH--S  
PSKKSQDQLQGLCSLAAEGIWT-DTFVFTEEALRRNGILDSDIPTLLDIGMLGKMGK-FE  
NCYIFLHPSLQEACAAIFYLLKSHGDHP IEDVKS-----VEALLFT-FLKKAKVQW  
ILGGRFIFGLLHESEQKKLEAFFGHQLSQEIKHQLYQCLETISVN-----  
-----EELQEIDGMKLFYCLFEMEDEDFLMEAMNYME-----  
-QINFVAKDYSVDVIVAA-YCLKHCYTLKLSFSSTQN-----ILNEEHEHS-----  
-----CMENLLTCWRHICSVLINSKDIQELQIKDTNLNEPAFVSVLYNSLKYC-----ND  
TLKVLVENVVFFLCEKYLFFELIQNC-NLQHLNLTFLSH-SDVKLLCDVNLQAECNIE  
KLE-----VAACNLSPDDCKMFASILMSSKTLKQLNLSSNIL-G  
KGISSLCKSLCHPDCILEHLVLAKCSLSDQCWDYLSDGIRQNKTLNHLDISSNDLKDEGL  
KVL-----  
-----CRALALPNSVLKSLCLRHLITTSQCQDLAEVLRNNQNLTSLQISYN  
KIEDAGVKLLCDAIKQPNCHLEDLGLEACELTGACCEDLASTFTQCRTLWGINLLNNTLD  
YTGLVVLCEALRQKCTPHVGLRITDFDNETQAFVLAEQEKNPDL SILSGV-----  
-----  
-----  
-----  
-----  
-----  
-----  
-----

#NLRP4b\_rat "gi|109458152|ref|XP\_344857.3| PREDICTED: similar to NACHT, leucine rich repeat and PYD containing 4B [Rattus norvegicus]"

-----MASLFSDFGFMWYKELNKVEFMKFKEILLILEILQM  
GLKQIS-----WTEVKNASREDLAILLVKYCEGKQAWDTTFKVLQKISRHD LTERATG  
EIAA-----  
-----HANIYRAHLKK  
KLTRDCSRKFSISIQN-----FFQDEYDHLNLLIPKVTEEKPQL--VFLKGIAGIGKTI  
LLKNLMIVWSEGLVFQNKFSYIFYFCCQDVK-QLKTTSLTELISREW PSSAPIEEI LSQ  
PEKLLFIIDSLEGMEWDFT----KQESELDCNCKEKQPVNVLSSLLK KILPESSLLIS  
ATFETFEELKDWIEYTNVRTITGFKESNIKMYFHSLSLFQDRN-----RALEAFSFVR  
ENEQLFTLCQAPVICCMVATCLKNEIEKGKDPVSI CRRTTSLYTTTHIFNLFIPPNVQ--Y  
PSKKSQDQLQGLCFLAVEGMWT-DISVFSEETLRRNGILDSDIPTLLDIGILEQSRE-SQ  
NSYIFFHPSVQEFCAAMFYLLQTHMNHSPDVLH-----VEKLLFS-FLKEVNTQW  
IFLGRFIFGLLNELEHEKLEAFFGYQLSQQLKQELFEWLELLLD-----  
-----PEVKVNTMKFFYCLFEMEEVFVQSAMNCRE-----  
-EIDVVAKDYDFIVAA-YCLNHGSALRDL S ISTQN-----VLNEKLNQR-----  
-----YMENLLMLWHNICSVFARNKDIHILQMKDTIFNEPVFQILYNYLKNS-----SC  
ILEVLVANDVSFLCDKYLFFDLIQSY-NLELLDLSGTFLSH-SDVVILCNILNKA EYK--  
-----IQELELANCSLSEQSWKYISDVLCQNKTLRHLDISSNDLKDEGL  
KVL-----  
-----CKALTLPDSVLLTSLAEACELTGACCEDLASTFTQCKTLGWINLVKN  
ALDFNGLVVLCKALKQKTSNLKELRLRITDFDNKSQTFL LSEEKGNKFLNIENDE-----  
-----  
-----  
-----  
-----  
-----  
-----

#NLRP4c\_rat "gi|109480334|ref|XP\_234957.4| PREDICTED: similar to NACHT, leucine rich repeat and PYD containing 4A [Rattus norvegicus]"

-----MASFFSDFGIMWYLKELNKREFVKFKEFLKQEILQF  
GLTIS-----CTEVKRATREGLANLLLKH YEEKQAWNITFNIFQKLNRTDLIERAKR  
EIAG-----  
-----HPKLYQAHLKT



RLKQIS-----WTKVKKASREDLANLLLLKHYYEKKQAWDMTFKIFQKMNKDLIERAGR  
EIAG-----  
-----HSKLYQAHLKK  
KLTHDYARKFNKAQDLFKQKFTQDDCDFENLLVSKATGKKPHM--VFLQGVAGIGKSL  
MLTKMLLAWSEGIVFQNKFSYIFYFCCQDVK-QLKRASLAELISREWPNASAPTAEILSQ  
PEKLLFIIDSLEVMCENMS----ERESELCNCTEKQPVSLLLSSLLRRKMLPESSFLIS  
ATPETFEKMEDRIECTNVKIITGFNENNIKMYFRSLFQDN-----RTLEAFSLVR  
ENEQLFNVCQVPVLCWVATCIKKEIEKGRDPVICRRTTSLYTTTHIFNLFTPQNAQ--Y  
PSKKSQDQLQGLCSLAAEGMWT-DTFVFSEEALRRNGILDSDIPTLLDRRILERSKE-SE  
SCYIFLHPSLQEVCAAVFYLLKSHLDHPSQDVKS-----VEALLFT-FLKKAKVQW  
IFLGCFLFGLLHESEKLEMFQGHQLSQEIKHQLYQCLETISVN-----  
-----EELQEQIDGMKLFYCLFEMEDEAFMQAMNCME-----  
-QINFAVDYSDVIVAA-YCLKHCSTLKKLSFSTQN-----ILSEEQEH-----  
-----YTEKLLICWHMCSVLISSKDIHVLQVKDTNLNETAFWVLYNHLKYP-----SC  
TLKVLVNNVTFLCDNHLFFELIQNQ-RLQHLNLSLTFLSH-SDVKLLCDVNLQAECNIE  
KLM-----IAACNLSPDDCKVFASVLISSKMLKHLNLSNNL-D  
KGISSLCKALCHPDCILKHLVLANCSLSEQCWDYLSEVVRNKTLSHLDISSNDLKDEGL  
KVL-----  
-----CGALTLPDGLISLSVRHCLITTSQCQDLAEVLRHNQNLRSQVSNN  
KIEDAGVKLLCDAIKQPNCHLENIGLEACEITGACCKDLASAFVHCKTLWGINLLENALD  
HSGLVVLFELKQKCTLHVLGLRITDFDKETQEFLIAEEKKNPYLSILSNV-----  
-----  
-----  
-----  
-----

#NLRP4f\_rat "gi|109458053|ref|XP\_001076792.1| PREDICTED: similar to NACHT, leucine rich repeat and PYD containing 4A [Rattus norvegicus]"

-----MASFSSDFSLVWYLKELNQEKFMKFKDFLIQEILEL  
KLKQIS-----WTEVKKASREGLSNLLKCYGENQALDMTFKILQKINRKDLTKKATR  
EIADS-----  
-----STLGLTDSSENSKLYREHLKK  
KLSHNCSKMFNINIQDFILETVIQDDYDTFENLLVSKGDEKPHM--VFLKGMAGIGKTL  
MLKNVMLAWAKGLVFNKFSYTFYFCCQDVK-QLKTASLAELISREWPISAPIEEILSQ  
PEKLLFIIDSLEGMWDLT----KQSEELCGNCTEKQPVSLLLSSLLRRKMLPESSFLIS  
ATPETFEKMEDRIRCTDVKTATAFNERSIEICFHRLFQDRN-----TAQKAFSLVR  
ENEQLFTLCQAPLLCWMVATCLKKEIEKGDVPSICRHITSLYTTYIFNSFIPQSAK--Y  
PSKKSQDQLQGLCSLAAEGMWT-DTFVFSEEALRRNGIMSDIPTLLDIGMLGKIRE-FE  
NSYFLHPSVQEICAAIFYLLKSHGVHPSQDVKS-----VETVLFM-FLKKVKTQW  
ILWGSFIFGLLHKSEKELAVFFGYQLSQKIRHKLYQCLETINGN-----  
-----VELQEQIDGMKLFYCLFEMEDDAFLVKAVNCMQ-----  
-QINFAVANYSDFFVAA-YCLKRCSTLKKLSFSTQN-----ALNEELEQQ-----  
-----YRERLLICWNDICSVFVRSKNIQTLQIKDTNFSEPTFRVLYESLKYP-----SF  
PLSKLVANNVHFFGDNMFFELIQNH-NLQYLDLSCSSLSP-NGVKLLFDVNLQAECNIE  
KLM-----VAHCKLSPDDCKIFGSILMSSKTLKILNLSNNL-N  
QGISSLCEGLCHPNCVLEYLVLANCSLSEQCWDYLSVLRKNKTLNHLDISCNDLKDKGI  
KIL-----  
-----CKALTLPDCFMKSLCLKHCQITTRGCQDLAEVLRNNQNLKHLHVSNN  
KLKDAGVKLLCDAIKHPNCHLVLDGLEACEITGASSENLSFAFIQCKTLKRLTLKGNAFE  
ISGMVFPKPF-----  
-----  
-----  
-----  
-----

#NLRP9\_dog "gi|73947407|ref|XP\_533578.2| PREDICTED: similar to NACHT, leucine rich repeat and PYD containing 9 protein [Canis familiaris]"



-----  
-----  
-----MTEFFSDFGLLWYLEELKKEEFWKFKELLKQEPLQL  
GLKPIP-----WTELKKASREDLAKMLDKHYPGKQAWDVTLNLFQINRHDLWTKAQE  
EIRN-----  
-----KSPYRNHMKE  
KFRLIWEKETCLPVPNDFYKETIKHEYENLHAAYRASQAEE--SSPTVVLOGPEGIGKTT  
LLRKVMLEWAEGNLWKDRFTFFIFFLNGCEMN-MITETSLVELISRDLPLSSEPVEDILSQ  
PERILFIMDGFEEKFDLE----LS-TPLCNDQRQRQPMQIILSSLLQRKMLPESLLIA  
LGTEGMRKNYCLLQHPKYITLPGFSEHERKLYFYHFFRERN-----KALKAFSFVR  
GNIPLFVFNPLVCWLVCTCMKWQLEKGEDLEIVSESTTSLYTSFFISVFQSRNET--C  
PPKHSRTRLKGLCTLAAMGVWT-RMFVFCHEDLRRNGISESDTLMWMMGRILQRSG----  
EYFTFTHMCLQEFCAAMFYVLKQPKDSPNPAIGS-----VTQLVTA-GVSQVQSPL  
SRMITFLFAFSTEKITNLETSGFLLSKELKQEITQCLKSLSQCD-----  
-----P-NQVAVNFQELFSGLFETHEKGFVAQVMDFFE-----  
-EVNIYIGNTEDLVISA-FCLKHCQNLRTLHLCIEN-----VFSDDS--GS-----  
-----INEKLSFWQDFCSVFTTNENFQMLDLNCKFSEASLAILCKALAQP-----VCK  
LQKYNFAS-DFG-SSPALHKAILHNP-HLKHLNLHGSSLSH-VDVRQLCEMLKHPTCSIE  
ELM-----LGMCDITAEACEEIASVLCNKKLKLKLSLAENPLRN  
EGMLMLCDALKHPDCVLETLLMCCCLTSVACDYISQALLCNKSLSFLDLLESNFLKDDGV  
ASL-----  
-----CEALKHPNCHIEQLWLADCSLTSLCKNLSDVLCNEKLIKILKLSN  
DIQDAGVKQLCEALKHPDCKVEHLGLDMCQLTTACCEALASALTVCCKSLKSLNLHWISLD  
RDGAVVLCEALNHLDCALQQLGLDKSVFDKEIQMLLTAVEEKNPHLTISHLLWINKEYRI  
RGVLT-----  
-----  
-----  
-----

#NLRP9\_bovine "gi|66954669|ref|NP\_001019835.1| NLR family, pyrin domain  
containing 9 [Bos taurus]"

-----  
-----MAESFFSDFGLLWYLEELKKEEFWKFKELLKQEPLKL  
KLKPIP-----WTELKKASRENVSKLLSKHYPGKLAWDVTLNLFQISRDDLWRKARN  
EIRQ-----  
-----KINPYRSHMKQ  
KFQVLWEKEPCLLPEDFYEETTKIEYELLSTVYLDFAKPG-ESSPTVVHLGPEGIGKTT  
FLRKVMLEWAKGNLWRDRFSVFFLTGREMN-GVTDMSLVELLSRDWPESEPIEDIFSQ  
PERILFILDGMEELKFDLD----CN-TDLCEDWEQPQSMQVVLQSLQKQMLPECSLLLA  
LSKMGMRKNYSLLKHMKCIFLLGFSEHQKLYFSHYFQEKD-----ASSRAFSFVR  
EKSSLFVLCQSPFLCWLVCVTSKLCQLEKGEDLELDSETITGLYVSFFTKVFRSGSET--C  
PLKQRRARLKSCLTAAEGMWT-CTFLFCPEDLRRNGVSESDTSMWLDKMLLHRSRSG----  
DCLAFIHTCIQEFCAMFYMFTRPKDPPHSVIGN-----VTQLITR-AVSEHYSRL  
SWTAVFLFVFS TERMTHRLETSGFPLSKEIKQEITQSLDLSQCD-----  
-----P-NNVMSFQALFNCLFETQDPEFVAQVVNFFK-----  
-DIDIYIGTKEELIICA-ACLRHCHSLQKFHLCMEH-----VFPDESGCIS-----  
-----NTIEKLTLRDVCSAFTASEDFEILNLDNCRFDEPSLAVLCRTLSQP-----VCK  
LRKFVCNFASNLANSLELFKVLHNP-HLKHLNLFYGSLSH-MDARQLCEALKHPCNIE  
ELM-----LGKCDITGEACEDIASVLVHNKKLNLKSLCDNALKD  
DGVVLVCEALKNPDCALEALLSHCCFSSAACDHLSQVLLYNRSLTFLDLGSNVLKDEGV  
TTL-----  
-----CESLKHPSCNLQELWLMNCYFTSVCCVDIATVLIHSEKLTCLKLGN  
KIYDAGAKQLCKALKHPKCKLENLGLAECELSPASCEDLASALTTCKSLTCVNLEWITLD  
YDGA AVLCEALVSLECSLQLLGLNKSSYDEEIKMMLTQVEEMPNLII SHLLWTDDEGRR  
RGILV-----  
-----  
-----

#NLRP11\_human "gi|21450725|ref|NP\_659444.1| NLR family, pyrin domain containing 11 [Homo sapiens]"

-----  
-----  
-----MAESDSTDFDLLWYLENLSKDFQSFKKYLARKILDF  
KLPQFP-----LIQMT---KEELANVLPISYEGQYIWNMLFSIFSMMRKEDLCRKIIIG  
RRNR-----  
-----NQEACKAVMRR  
KFMLQWESHFTGKFHYKFFRDVSSDVFYILQLAYDSTSYYSANNLN-VFLMGERASGKTI  
VINLAVLRWIKGEMWQNMISYVVHLTSHEIN-QMTNSSLAELIAKDWPDGQAPIADILSD  
PKKLLFILEDLNIRFELN----VNESALCSNSTQKVP IPVLLVSLKRRKMAPGCWFLIS  
SRPTRGNNVKTFLKEVDCCTTLQLSNGKREIYFNSFFKDRQ-----RASAALQLVH  
EDEILVGLCRVAILCWITCTVLKRQMDKGRDFQLCCQTPDLHAHFLADALTSEAGL--T  
ANQYHLGLLKRLCLLAAGGLFL-STLNFSGEDLRCVGFTEADVSVLQAANILLPSNT-HK  
DRYKFIHLNVQEFCTAIAFLMAVPNYLIPSGSRE-----YKEKREQ-----YSDF  
NQVFTFIFGLLNANRRKILETSFGYQLP-MVDSFKWYSVGYMKHLD-----  
-----RDPEKLTHHMPFLFYCLYENREEEFVKTIVDALM-----  
-EVTVYLQSDKMMVSL-YCLDYCCHLRTLKLSVQRIFQ-----NKEPLIRPTA-----  
-----SQMKS LVYWREICSLFYTMESLRELHIFDNDLNGISERILSKALEHS-----SC  
KLRTLKLSYVSTASGFEDLLKALARNRSLTYLSINCTSISL-NMFSLLHDILHEPTCQIS  
HLS-----LMKCDLRASECEEIASLLISGGSLRKLTLSSNPLRS  
DGMNILCDALLHPNCTLISLVLVFCCLTENCCSALGRVLLFSPTLRQLDLCVNRLKNYGV  
LHV-----  
-----TFPLLFP TCQLEELHLSGCFSSDICQYIAIVIATNEKLRSL EIGSN  
KIEDAGMQLLCGGLRHPNCMLVNI GLEECMLTSACCRSLASVLT TNKTLERLNL LQNH LG  
NDGVAKLLES LI SPDCVLKVVGLPLTGLNTQTQQLLMTVKERKPSLIFLSETWLSKEGRE  
IGVTPASQPGSIIPNSNLDMFFKFP RMSAAMRTSNTASRQPL-----  
-----  
-----

#NLRP11\_chimpanzee "gi|114679217|ref|XP\_524402.2| PREDICTED: NACHT, leucine rich repeat and PYD containing 11 [Pan troglodytes]"

-----  
-----  
-----MAESDSTDFDLLWYLENLSKDFQSFKKYLARKILDF  
KLPQFP-----LIQMT---KEELANVLPISYEGQYIWNMLFSIFSMMRKEDLCRKIIIG  
RRNR-----  
-----NQEACKAVMRR  
KFMLQWESHFTGKFHYKFFRDVSSDVFYILQLAYDSTSYYSANNLN-VFLMGERASGKTM  
VINLAVLRWIKGEMWQNMISYVVHLTSHEIN-QMTNSSLAELIAKDWPDGQAPIADILSD  
PKKLLFILEDLNIRFELN----VNESALCSNSTQKVP IPVLLVSLKRRKMAPGCWFLIS  
SRPTRGNNVKSFLKEVDCCTTLQLSKEKREIYFNSFFKDRQ-----RASAALQLVH  
EDEILVGLCRVAILCWITCTVLKRQMDKGRDFQLCCQTPDLHAHFLADALTSEAGL--T  
ANQYHLGLLKRLCLLAAGGLFL-STLNFSGEDLRCVGFTEADVSVLQAANILLPSST-HK  
DRYKFIHLNVQEFCTAIAFLMAVPNYLIPSGSRE-----YKEKREQ-----YSDF  
NQVFTFIFGLLNANRRKILETSFGYQLP-MVDSFKWYSVGYMKYLD-----  
-----RDPEKLTHHMPFLFYCLYENREEEFVKTIVDALM-----  
-EVTVYLRSKDKMMVSL-YCLDYCCHLRTLKLSVQHIFQ-----NKEPLIRPTA-----  
-----SQMKS LVYWREICSLFYTMESLWELHIFDNDLNGISERILSKALEHS-----SC  
KLRTLKLSYVSTASGFEDLLKALARNRSLTYLSINCTSISL-NMFSLLHDILHEPTCQIS  
HLS-----LMKCDLRASECEEIASLLISGGSLRKLTLSSNPLRS  
DGMNILCDALLHPNCTLISLVLVFCCLTENCCSALGRVLLFSPTLRQLDLCVNRLKNYGV  
LHV-----  
-----TFPLLFP TCQLEELHLSGCFSSDICQYIAIVIATNEKLRSL EIGSN  
KIEDAGMQLLCGGLRHPNCMLVNI GLEECMLTSACCRSLASVLT TNKTLERLNL LQNH LG  
NDGVAKLLES LI SPDCVLKVVGLPLTGLNTQTQQLLMTVKERKPSLTF LSETWLSKEGRE  
IGVTPASQPGSIIPNSNLDMFFKFP RMSAAMRMSNTASRQPL-----  
-----

-----  
-----  
-----  
#NLRP13\_human "gi|110624785|ref|NP\_789780.2| NACHT, leucine rich repeat and PYD containing 13 [Homo sapiens]"  
-----

-----MNF SVITCPNGGTTNQG L L P Y L M A L D Q Y Q L E E F K L C L E P Q Q L M D  
FWSAPQGHFPRIPWANLRAADPLNLSFLLDEHF PKGQAWKVVLGIFQTMNLTSLCEKVRA  
EMK-----ENVQTQELQDPTQEDLEM  
LEAAAGNMQTQGCQDPNQEELEEEETGNVQAQGCQDPNQEEPEMLEEA-DHRRKYREN  
MKAELLETDWNI SWPKDHVYIRNTSKDEHEELQRLLDPNRTRAQAQTIVLVGRAGVGKTT  
LAMQAMLHWANGVLFQQRFSYVFYLSCHKIR-YMKETTFAELISLDWPDFDAPIEEFMSQ  
PEKLLFIIDGFEEIIISESRSESLDDGSPCTDWYQELPVTKILHSLKELVPLATLLIT  
IKTWFVRDLKASLVNPCFVQITGFTGDDL RVYFMRHFDDSS-----EVEKILQQLR  
KNETLFHSCSAPMVCWTVCSCLKQPKVRYDLQSITQTTTSLYAYFFSNLSTAEVD--L  
ADDSWPGQWRALCSLAIEGLWS-MNFTFNKEDTEIEGLEVPFIDSLYEFNILQKIND-CG  
GCTTFTHLSFQEFFAAMSFVLEEPREFPPHSTKP-----QEMKMLLQHVLLDKEAYW  
TPVVLFFFGLLNKNIARELEDTLHCKISPRVMEELLKWGEELGKA-----  
-----ESASLQFHILRLFHCLHESQEEDFTTKMLGRIF-----  
-EVDLNILEDEELQASS-FCLKHCKRLNKLRLSVSSHILERDLEILETS-----  
-----KFDSRMHAWNSICSTLVTNENLHELDLSNSKHLHASSVKGLCLALKNP-----RC  
KVQKLTCKSVTPPEWVLQDLIIALQGN SKLTHLNFSSN-KLGMTVP-LILKALRHSACNLK  
YLC-----LEKCNLSAASCQDLALFLTSIQHVTRLCLGFNRLQD  
DGIKLLCAALTHPKCALERLELWFCQLAAPACKHLSDALLQNRSLTHLNL SKNSLRDEGV  
KFL-----  
-----CEALGRPDGNLQSLNLSGCSFTREGCGELANALSHNHVKILD LGEN  
DLQDDGVKLLCEALKP-HRALHTLGLAKCNLTACCQHLFSVLSSSKSLVNLNLLGNELD  
TDGVKMLCKALKKSTCRLQKLG-----  
-----  
-----  
-----

-----  
-----  
-----  
#NLRP13\_chimpanzee "gi|114679233|ref|XP\_524405.2| PREDICTED: NACHT, leucine rich repeat and PYD containing 13 isoform 2 [Pan troglodytes]"  
-----

-----MNF SVITCPNGGTTNQG L L P Y L M A L D Q Y Q L E E F K L C L E P Q Q L M D  
FWSAPQGHFPRIPWANLRAADPLNLSFLLDEHF PKGQAWKVVLGIFQTMNLTSLCEKVRA  
EMK-----ENVQTQELQDPTQEDLEM  
LEAAAGNMQTQGCQDPNQEELEEELEEEETGNVQAQGCQDPNQEEPEMLEEA-DHRRKYREN  
MKAELLETDWNI SWPKDHVYIRNTSKDEHEELQRLLDPNRTRAQAQTIVLVGRAGVGKTT  
LAMQAMLHWANGVLFQQRFSYVFYLSCHKIR-YMKETTFAELISLDWPDFDAPIEEFMSQ  
PEKLLFIIDGFEEIIISESRSESLDDGSPCTDWYQELPVTKILHSLKELVPLATLLIT  
IKTWFVRDLKASLVNPCFVQITGFTGDDL RVYFMRHFDDSS-----EVEKILQQLR  
KNETLFHSCSAPMVCWTVCSCLKQPKVRYDLQSITQTTTSLYAYFFSNLSTAEVD--L  
ADDSWPGQWRALCSLAIEGLWS-MNFTFNKEDTEIEGLEVPFIDCLYEFNILQKIND-CG  
GCTTFTHLSFQEFFAAMSFVLEEPREFPPHSTKP-----QEMKMLLQHVLLDKEAYW  
TPVVLFFFGLLNKNIARELEDTLHCKISPRVMEELLKWGEELGKA-----  
-----ESASLQFHVLRRLFHCLHESQEEDFTTKMLGRIF-----  
-EVDLNILEDEELQASS-FCLKHCERLNKLRLSVSSHILERDLEILETS-----  
-----KFDSRMHAWNSICSTLVTNENLHELDLSNSKHLHASSVKGLCLALKNP-----RC  
KVQKLTYSVTPPEWVLQDLIIALQGN SKLTHLNLSSN-KLGMTVP-LILKALRHSACNLK  
YLC-----LEKCNLSAASCQDLALFLTSIQHVTRLCLGFNRLQD  
DGIKLLCAALTHPKCALERLELWFSQLAAPACKHLSDALLQNRSLTHLNL SKNSLRDEGV  
KFL-----  
-----CEALGRPDGNLQSLNLSGCSFTREGCRELANALSHNHVKILD LGEN  
DLQDDGVKLLCEALKP-HRALHTLGLAKCNLTACCQHLFSVLSSSKSLVNLNLLGNELD

TDGVKMLCKALKKSTCRLQKLG-----  
-----  
-----  
-----  
-----  
-----

#NLRP13\_dog "gi|73947403|ref|XP\_541402.2| PREDICTED: similar to NACHT, leucine rich repeat and PYD containing 13 [Canis familiaris]"

-----MSSSANIYVDNGSYDKLLSYLMGLDQSQLEEFKLCLQSPQLLL  
EN-----FRKIPWANLKAIDPINLLCLLSEYFSEKQMWVETLSIFENMNLTSLCMEIGA  
TMN-----GEWQKQETKRYTQVIVGS  
VESIIGHFQPRYLNIPS-----LFVSEMEQALGPQDPNQEAEMPEEEKVHRRRYRER  
MKAKILMMWDNMPWPEDHIYLRNVTEKEHDELKSLLYPNRTGAQPQTIIILEGIAGVGKTT  
LAMKAMLHWAEGFLFQQRF SYVFFISCHKVK-DMKDITTFAGLLSWDWPDSQVPIEELMSH  
PERLLFVIDGFEEMDMP SN---LDNSPPCTDWYQQLPVNRILFYLLKKELVPMATLLIT  
TKEYRTKDLKLLLNPFVQILGFTEGDREEYFIRYFGDQK-----KAKKVLYWVR  
KNETLFYFCSAPLVCWTVCSCLKRQMVNRPHFQISTQTTTSLYVHFFSSLFATAEVS--L  
SEQNWPGQWSALCSLAAEGMWF-RNFTFTKEDLKHKCLEAHLIGSLLRLNLRKVNDC  
ECVTFTHQSFQVFLGAMFYVLWGTKSIGGPAKH-----EEMRVLLNNALVDRNFYW  
NQMALFFFGLLKRSLIRELEDTLCCCKVQQRIMDELLEWAEELKSY-----  
-----DIVLNRFEFLHFFSCLYETQEENFVRQILSHLL-----  
-EADINIFGNQQLQVSS-FCLKHCRSLSKLRLSVTSSILQTELTFSVET-----  
-----LEPHSKIYQWQDICSVFCNGHVSELDLSNSKLNNTSSMKKLCYELRNP-----RC  
KLRKLTCKSITPVKILKELVVLVHGNRLTHLNLSSN-NLGVVPVSTMIFKTLRHSACNLQ  
YLC-----LEKCNLSAAIYQDLALHVSSTQRTTRLCGLFNPLQD  
DGVRLCAALHPECALERLVLWFQCLGAPSCRYLSEALLKNKSLTHLNLRRNKLRLRDEGV  
KFL-----  
-----CKALSHPDQSLQNLDSLDCSFTADGCQELANALRHNNMKILDIRNN  
DVQDNGVKHLCEVLQDPYCELNLTGLGKCNLTPACCQHLSSVLTSSKSLINLNLENDLE  
PSGVSILWKALKKSMCKLQKLG-----  
-----  
-----  
-----  
-----

#NLRP13\_bovine "gi|119925439|ref|XP\_608304.3| PREDICTED: similar to NACHT, leucine rich repeat and PYD containing 13 [Bos taurus]"

-----MASPAGISWHDGARDQLLSHLRGLDPWQLEDKFLALQCEPLL  
EG-----ARRIPWADLRAAGPADLLCLLEERFPGRRTWEAALRVFEDLRLSSLCEMRA  
ELHGWF CILTVGPGAAGMATRRQHFFLPNSGYLGNQSLRTHPSSCHTALQRELSSGFCI  
LAVGPGAIVVLRRELMDVNLQYIIVEPEMSQVCRLQDPNQEEPETLEET-AHRRRYRER  
LRTRILALWDRTPWPEDHIYLRHVTRQREHAELRGLLRPRGAGAPPLTMLLEGAAGVGKTT  
LATKLVLHWAEGVLFGRF SYVFI SGHWLA-KLGDISFAGLLALDWPDSQVPVEEFRAH  
PERLLFVIDGAEVTLGSK---GSASRPGADWYQELPAASILVRLKKELVPEATLLVT  
AGPPGGRALRGLLRPCRVDIPGFTEGDRREYLRRFLGDPD-----VAEEAWRRMQ  
GSETLVRLCAAPLACWAVCAGLKRQLAGSPAPAPGAPTPTGLYAQLFCSSLLAGAEPG--L  
RTGSSAGQWRAFCSLAAEGLWL-AAFTFAGDALERWRLEAPFIDGLLRLQILRRVSD-CE  
HCVTFAHRSFQEFFGALFYVLWGAQGS LGG VPRH-----QEMRRWLNHAFADANPYW  
RQMVRRFFFGLLGTDLARQLEEAVGCRMSPGVADEVLDWAEELERC-----  
-----GAVSGRDFDLWLFQCLHETQDENLARRVLNRLP-----  
-VADLDIQGCEHLRVSS-FCLKHCQKLRKLRSLVSHRVLEKKRTSGLGTPE-----  
---MRVADFRMHQWEDICSVFCSGNLSQLDLSNSKLNSTASMMRLCLKLGNP-----QC  
RLQKLAWSMAPVEGLRKLGLLLRGRHLTHLNLSSN-SLDAVSRGVFRMLGHSACGLK  
YLW-----LEKGNLSAAACEDLASLLTSTPRLTRLCGLNPLGD  
EGVQLLCSLTRPECVLQRLELWCCRLSTPSCRHLSDALRRSRLTHLNLRRNSLGDGGV

KLL-----  
-----SSALGRADCALQSLNLSHCSLTVAGCRELAHALKHNGHLKILDVGN  
DIQDEGVKELCSVLKSPSCVLQTLGLEKCSLTAACCRPLSSVLGSSKSLENLNLGNNLG  
PDGVSRLWMLPRKPTCKLRKLG-----  
-----  
-----  
-----  
-----

#NLRP8\_human "gi|33667040|ref|NP\_789781.2| NLR family, pyrin domain containing 8  
[Homo sapiens]"

-----MSDVNPPS  
DTPIPFSSSTHSSHIP--WTFSCYPGSPCENGVMYMRNVSHEELQRFKQLLLTELS-T  
GTMPIT-----WDQVETASWAEVVHLLIERFPGRRAWDVTSNIFAIMNCDKMCVVVRR  
EINAILPTLEPEDLNVGETQVNLEEGE-----  
-----SGKIRRYKSNVME  
KFFPIWDITTPGNQRDFFYQGVHRHEEYLPCLLLPKRPQGRQPK-TVAIQGAPGIGKTI  
LAKKVMFEWARNKFYAHKRWCIFYFHCQEVN-QTTDQSFSELIEQKWPQSQDLVSKIMSK  
PDQLLLLLLDGFEELTSTLID----RLEDLSEDWRQKLPGSVLLSSLLSKTMLPEATLLIM  
IRFTSWQTCKPLLKCPSLVTLPGFNTMEKIKYFQMYFGHTE-----EGDQVLSFAM  
ENTILFSMCRVPVVCWVMVCSGLKQQMERGNLTSQCPNATSVFVRYISSLPTRAEN--F  
SRKIHQAQLEGLCHLAADSMWH-RKWVLGKEDLEEAKLDQTGVTAFMGMSILRRIAG-EE  
DHYVFTLVTFQEFFAALFYVLCFPQRLKNFHVLS-----HVNIQRLIASPRGSKSYL  
SHMGLFLFGFLNEACASAVEQSFQCKVSVFGNKRKLLKVIPLLHKC-----  
-----DPPSPGSGVPLFYCLHEIREEFVSQALNDYH-----  
-KVVLRIGNNKEVQVSA-FCLKRCQYLHEVELTDTLNFNMNVWKLSSSSHPGSEAP-----  
-----ESNGLHRWWQDLCVDFATNDKLEVLMTNSVLGPPFLKALAAALRHP-----QC  
KLQKLLLRVNSTMLNQDLIGVLTGNQHLRYLEIQHVEVES-KAVKLLCRVLRSPRCRLQ  
CLR-----LEDCLATPRIWTDLGNLQNGHLKTLILRKNLEN  
CG-----AYYLSVAQLERLSIENCNLTQLTCESLASCLRQSKMLTHLSLAENALKDEGA  
KHI-----  
-----WNALPHLRCPQLRVLVRKCDLTFNCCQDMISALCKNKTLSLDLSFN  
SLKDDGVILLCEALKNPDCTLQILELENCLFTSICCQAMASMLRKNQHLRHLDSLKNAIG  
VYGILTLCFAFSSQKKREEVIFCIPAWTRITSFSPTPHPPDFTGKSDCLSQINP-----  
-----  
-----  
-----  
-----

#NLRP8\_chimpanzee "gi|114679237|ref|XP\_512922.2| PREDICTED: NACHT, leucine rich  
repeat and PYD containing 8 [Pan troglodytes]"

-----MSDVNPPS  
DTPIPFSSSTHSSHIP--WTFSCYPGSPCENGVMYMRNVSHEELQRFKQLLLTELS-T  
GTMPIT-----WDQVETASWAEVVHLLIERFPGRRAWDVTSNIFAIMNCDKMCVLVRR  
EINAILPTLEPEDLNVGETQVNLEEGE-----  
-----SGKIRRYKSNVME  
KFFPIWDFTTWPNQRDFFYQDVRHEEYLPCLLLPKRPQGRQPK-TVVIQGAPGIGKTI  
LAKKVMFEWARNKFYAHKRWCIFYFHCQEVN-QMTDQSFSELIEQKWPQSQDLVSKIMSK  
PDQLLLLLLDGFEELTSTLID----RLEDLSEDWRQKLPGSVLLSSLLSKTMLPEATLLIM  
IRFSSWQTCKPLLKCPSLITLPGFNTMEKIKYFQMYFGHTE-----EGDRVLSFAM  
ENTILFSMCRVPVVCWVMVCSGLKQQMERGNLTHACPNATSVFVRYISSLPTRAEN--F  
SRKIHQAQLEGLCHLAADSMWH-RKWVLGKEDLEEAKLDQTGVTAFMGMSILRRIAG-EE  
DHYVFTLVTFQEFFAALFYVLCFPQRLKNFHVLS-----HVNIQRLIASPRGSKSYL  
SHMGLFLFGFLNEACASAVEQSFQCKVSVFGNKRKLLKVIPLLHKC-----  
-----DPPSPGSGVPLFYCLHEIREEFVSQALNDYH-----  
-KVVLRIGNNKEVQVSA-FCLKRCQYLHEVELTDTLNFNMNVWKLSSSSPPGSEAP-----  
-----ESNGLHRWWQDLCVDFATNDKLEVLMTNSVLGPPFLTALAAALRHP-----QC

KLQKLLLRVNSTMLNQDLIGVLMGNQHRLYLEIQHVEVES-KAVKLLCRALRSPRCRLQ  
CLR-----LEDCLATPRIWTDLGNLQGNHGLKTLILRKNLEN  
CG-----AYYLSMAQLERLSIENCNLTQLTCESLASCLRQSKMLTHLSLAENALKDEGA  
KHI-----  
-----WNALPHLRCPQLRVLVRKCDLTFNCCQDMISALCKNKTLSLDLSFN  
SLKDDGVILLCEALKNPDCTLQILELENCLFTSICCCQAMASMLRKNQHRLHLDLSKNAIG  
VYGILTLCFAFSSQKKREEVIFCIPAWTRITSFSPTPHPPDFTGKSDCLSQINPYAVQSS  
FSGA-----  
-----  
-----  
-----

#NLRP5\_human "gi|114842393|ref|NP\_703148.3| NACHT, LRR and PYD containing protein 5 [Homo sapiens]"

-----MKVAGGLELGAAALLSASPRALVTLSTGPTC  
SILPKNPLFPQNLSSQPCIKMEGDKSLTFSSYGLQWCLYELDKEEFQTFKELLKKKSSSES  
TTCSIP-----QFEIENANVECLALLLHEYYGASLAWATSISIFENMNLRTLSEKARD  
DMKRHSPEDPEA----TMTDQGPSKEKVPGISQAVQQDSATAAETKEQEISQAMEQEGAT  
AAETEEQ-----GHGGDTWDYKSHVMT  
KFAEEED-----VRRSFENTAADWPEMQTLAGAFDSD-RWGFRPR-TVVHLHGKSGIGKSA  
LARRIVLCWAQGGLYQGMFSYVFFLPVREM-QRKKESSVTEFISREWPDSPAPVTEIMSR  
PERLLFIIDGFDDLGSVLN-----NDTKLCKDWAEEKQPPFTLIRSLLRKVLPEFLIIVT  
VRDVGTEKLEKSEVSPRYLLVRGISGEQRIHLLLERGIGEH-----QKTQGLRAIM  
NNRELLDQCQVPAVGS LICVALQLQDVVGESVAPFNQTLTGLHAAFVHFQLTPRGVVRR  
LNLEERVVLKRFCRMAVEGVWN-RKSVFDGDDLMVQGLGESELRALFHMNILLPDSH-CE  
EYTFHLSLQDFCAALYVLEGLEIEPALCPLY-----VEKTKRSMELKQAGFHIHS  
LWMKRFLFGLVSEDVRRPLEVLLGCPVPLGVKQKLLHWVS-LLGQQ-----  
-----PNATTPGDTLDAFHCLFETQDKEFVRLALNSFQ-----  
-EVWLPINQNLDLIASS-FCLQHCPYLKIRVDVKGIFPRDESAEACP-VVPLWM-----  
----RDKTLIEEQWEDFCMSLGTPLRQLDLGSSILTERAMKTLCAKLRHP-----TC  
KIQTLMFRNAQITPGVQHLWRIVMANRNLRSNLGGTHLKE-EDVRMACEALKHPKCLLE  
SLR-----LDCCGLTHACYLKISQILTTSPSLKSLSLAGNKVTD  
QGVMPLSDALRVSQCALQKLILED CGITATGCQSLASALVSNRSLTHLCLSNNSLGNEGV  
NLL-----  
-----CRSMRLPHCSLQRLMLNQCHLDTAGCGFLALALMGNSWLTHLSLSMN  
PVEDNGVKLLCEVMREPSCHLQDLELVKCHLTAACCESLSCVISRSRHLKSLDLTDNALG  
DGGVAALCEGLKQKNSVLARLGLKACGLTSDCCEALSLALSCNRHLTSLNLVQNNFSPKG  
MMKLCSAFACPTSNLQIIGLWKWQYPVQIRKLLLEEVQLLKPRVVIDGSWHSFDEDDRYWW  
KN-----  
-----  
-----

#NLRP5\_chimpanzee "gi|114679239|ref|XP\_001139299.1| PREDICTED: NACHT, LRR and PYD containing protein 5 [Pan troglodytes]"

-----MTHGSNPLPSLLSAAMLLAIRCSRTLPGVERNLVTLSTGPTC  
SILPKNPLFPQNLSSQPCIKMEGDKSLTFSSYGLQWCLYELDKEEFQTFKELLKKKSSSES  
TTCSIP-----QFEIENANVECLALLLHEYYGASLAWATSISIFENMNLRTLSEKARD  
DMKRHSSSEDPEA----TTTDQGPSKEKVPGISQAVQQDSATAAETKEQEISQAMEQEGAT  
AAETEEQEISEAEEAGTIEAKRQ-----GHGGDTWDYKSHVMT  
KFAEEQD-----VRRSFEKSAADWPEMQTLAGAFNSD-QWGFRPR-TVVHLHGKSGIGKSA  
LARRIVLCWAQGGLYQGMFSYVFFLPVREM-QRKKESSVTEFISREWPDSPAPVTEIMSR  
PERLLFIIDGFDDLGSVLN-----SDTKLCKDWAEEKQPPSILIRSLLRKVLPEFLIIT  
VRDVGIEKLEKSEVSPRYLLVRGISGEQRIHLLLERGIGEH-----QKTQGLRAIM  
NNRKLFDQCQVPAVGS LICVALQLQDVVGESVAPFNQTLTGLYAAFVHFQLTPRGVARRC  
LNLEERVVLKRFCRMAVEGVWN-RKSVFDGDDLMVQGLGESELRALFHMNILLPDSH-CE  
EHYTFHLSLQDFCAALYVLEGLEIEPALCPLY-----VEKTKRSMELKQAGFHIHS  
LWMKRFLFGLVSEDVRRPLEVLLGCPVPLGVKQKLLHWVS-LLGQQ-----

-----QKAPGDTLDAFHCLFETQDKEFVRLALNGFQ-----  
-EVWLPIQNLDLIASS-FCLQHCPYLKIRVDVKGIFPRDESAEACP-VVPLWM-----  
----RGKTLIEEQWEDFCVSLGTHPHLRQLDLGSSILTERAMKTLCAKLRHS-----TC  
KIQTLMFRNAQITAGVQHLWRILMANRNLRSNLGGTHLKE-EDVRMACEALKHPKCLLE  
SLR-----LDCCGLTHACYLKISQILTTSPSLKSLSLAGNKVTD  
QGVTPLSDALRVSQCALQKLILED CGITATGCQSLASALVSNRSLTHLCLSNNSLGNEGV  
NLL-----  
-----CRSMRPHCSLQRLMLNQCHLDTAGCGFLALALMGNSWLTHLSLSMN  
PVEDNGVKLLCEVMREP SCHLQDLELVKCHLTAACCELSCVISRSRHLKSMDLTDNALG  
DVGVAALCEGLKQKNSVLRGLKACGLTSDCCEALSLALSCNRHLTCLNLVQNNFSPKG  
MMKLCSAFACPTSNLQI IGLWKWQYPVQIRKLLLEEVQLLKPQIVIDGSWHSFDEDDRYWW  
KN-----  
-----  
-----

#NLRP5\_mouse "gi|7106379|ref|NP\_035990.1| NACHT, leucine rich repeat and PYD  
containing 5 isoform a [Mus musculus]"

-----MGPPEKESKAILKARGLEEEQKSERKMTSPENDSKSIQKDQGPQE  
QTSEST-----MGPPEKDSKAILKARGLEEEQKSESTMSPSENVSRAILKDSGSEVE  
QASERKMTSPENDSKSIQKDQGPQEQTSETLQSKEEDEVTEADK-----  
-----NGDDLQDYKAHVIA  
KFDTSVD-----LHYDS-----PEMKLLSDAFKPY-QKTFQPH-TIILHGRPGVGKSA  
LARSIVLGWAQGKLFQKMS-FVIFFSVREIK-WTEKSSLAQLIAKECPDSWDLVTKIMSQ  
PERLLFVIDGLDDMDSVLQH---DDMTLSRDWKDEQPIYILMYSLLRKALLPQSFLIIT  
TRNTGLEKLSMVVSPLYILVEGLSASRRS QLVLENISNES-----DRIQVFHSLI  
ENHQLFQDQCQAPSVCSLVCEALQLQKKGKRCRCLTLPQTLTGLYATLVFHQLTLKRPSQSA  
LSQEEQITLVGLCMMAAEGVWT-MRSVFYDDDLKNYSKKESEILALFHMNILLQVGHNSE  
QCYVFSHLSLQDFFAALYVLEGLE-EWNQHFCF-----IENQRSIMEVKRT-DDTRL  
LGMKRFLFGLMNKDILKTLEVLFEYPIPTVEQKLQHWVS-LIAQQ-----  
-----VNGTSPMDTLDAFYCLFESQDEEFVGGALKRFQ-----  
-EVWLLINQKMDLVSS-YCLKHCQNLKAI RVDIRDLLSVDNTLELCPVTVQET-----  
----QCKPLLEWGWGFCVSLGSLRNLKELDLGDSILSQRAMKILCLELRNQ-----SC  
RIQKLTFKSAEVVSGLKHLWKLFSNQNLYLNLGNTPMKD-DDMKLACEALKHPKCSVE  
TLR-----LDSCELTIIGYEMISTLLISTTRLKCLSLAKNRVGV  
KSMISLGNALSSSMCLLQKLI LDNCGLTPASCHLLVSALFSNQN LTHLCLSNNSLGTEGV  
QQL-----  
-----CQFLRNPECALQRLILNHCNIVDDAYGFLAMRLANNTKLTHLSLTMN  
PVG DGAMKLLCEALKEPTCYLQELELVDCQLTQNCCEDLACMITTTKHLKSLDLGNALG  
DKGVITLCEGLKQSSSLRRLGLGACKLTSNCCALSLAISCNPHLNSLNLVKNDFSTSG  
MLKLCSAFQCPVSNLGI IGLWKQEYARVRRQLEEVFVKPHVVIDGDWYASDEDDRNWW  
KN-----  
-----  
-----

#NLRP5\_rat "gi|109458087|ref|XP\_218237.4| PREDICTED: similar to NACHT-, LRR- and  
PYD-containing protein 5 (Maternal antigen that embryos require) (Mater protein)  
(Ooplasm-specific protein 1) (OP1) [Rattus norvegicus]"

-----MSVSLKIRFCSHFIFLLSSYLTSY-----  
-----RGGDLQDYKAHVIA  
KFDTSVD-----LHCDG-----PEMKVLSDAFKPH-QKTFRPH-TIILHGRPGVGKSA  
LARSII LGWAQGKLYQDMS-YVFLFSVREMK-WTEKSSLAQLMANEWPHSQAPVTKIMSQ  
PERLLFVIDGLDDMDSALQH---DDMTLSRDWKDKQPIYILVYSLLRKALLSQSFLIIT  
TRNTGLENLRSMVVSPLYILVEGLSASRRS QLVLENIPDDH-----QKIQVFHHSVI

ENHQLFDQSQAPSFCSLVCEALQLQEKLGRCTLPCQTLTDLYATLVFHQLTSRGPSSQRA  
LSKEEQITLVGLCRMALEGVVT-MRSVYDDDLKSYSLKQSEISALFHVNIILLQVGHSSSE  
QCYVFFDLSLQDFFAALYVLEGLG-EWNQYFSY-----ITNQRNIMEVKRS-SDSHL  
LEMKRFLFGLMNKDTLKTVEVLFRCPTVPPKQKQLQHCLS-LIGQQ-----  
-----VNGSSPMDTLDIFYLLFESQDEEFVHMALKSFO-----  
-EVWLLINQKMDLMVSS-YCLOQCQNLKAIKRVDISDLFVSDNTPKLCV-VALQKT-----  
----QCKPLIEWWENFCTVLSTHPNLKTLDLGHSILNEWSMKILCLKLRNS-----SC  
SIQNLTFKNSEVVSGLQYLWMLLVSNRNLKYLNLGNTPMKD-DDIKLACEALKHPSCSLE  
TLR-----LDSCELTLTGYELISKLLLSASSLKCLSLARNKVG  
KSMTSLGEALSSSTCTLQKLILNECFVSPFPTNAVLPALKILS--KHNLSHLCQVLSLSI  
SVL-----  
-----CSILGNPVCLSRSLLLNHCNIIKDAYGFLALILANNRKLTHLSLTMN  
PVGNSAMKLLCEALKEPTCYLQDLELVDCQLTENCCEDLACMITTTKHLQSLDLGNALG  
DKGVITLCKGLKQSSSSLRRLGLAACGLTSKCCEVLSSALSCLNPYLSLNLVNRNDFNTSG  
MLKLCSAFQNPASNLWIIIGLWKQFYAQVRRQLEEVQFIKPHVVIDGDWYSIDEDDRNWW  
KN-----  
-----  
-----

#NLRP5\_bovine "gi|56118314|ref|NP\_001007815.1| NACHT, LRR and PYD containing protein 5 [Bos taurus]"

-----  
-----MREAKIAPLSNYGLQWCFEQLGKEEFQTFKALLKEHASES  
AACSFPE-----LVQVDRADAESLASLLHEHCRASLAWKTSTDFEKMSLSALSEMARD  
EMKKYLLAEISEDSAPTKTDQGPSMKEVPGPRED-----  
-----PQDSRDYRIHVMT  
TFSTRLD-----TPQRFEEFASECPDAHLSGAFNPDPSSGGFRPL-TVVVHGGPPGVGKSS  
LARRLLLFWAQGDLYKGLFSYVFLLRARDLQ-GSRETSFAELISKEWPDAPVPEKVLVLSQ  
PERLLIVVDGLELELTFRD----QDSSLLADWAERQPAPVLAHSLKLVLLPECALLLT  
VQDAGLQRLQALLRSPRYLWVGGLSVENRMQLLLGGGKHCR-----RKTCAWHAGA  
DHQEVLDKQCQVPVVCALVREALELQGEPEGKGLPVPGHTLTGLYATFVFQRLAPKDAGWRA  
LSGEERGALKGLCRLAADGVWN-AKFVFDGDDLGVHGLQGPESLALQOASILLPDGH-CG  
RGHAFSHLSLQEFFAALFYVLRGVEGDGEGYPLF-----PQSTKSLTELRRHIDLNVQL  
VQMKRFLFGLVSKVEMRALETLLGCPVPRVPAKQQLLHWIC-LVGQH-----  
-----PAAAASPDLEAFYCLFEAQDDEFVRLALNGFQ-----  
-EVWLQLNRPMDLTVSS-FCLRRQCQLRKRRLDVRGTP-KDEFEAES-  
GAPQGL-----  
----KIK-TLDEHWEDLCSVLSTHPNLRQLDLGSGSVLSKEAMKTLKVKLRQP-----AC  
KIQNLIFKGARVTPGLRHLWMTLIIINRNITRLDLTGCRLE-EDVQTACEALRHPQCALE  
SLR-----LDRCGLTPASCREISQVLATSGSLKSLSLTGNKVAD  
QGVKSLCDALKVTPCTLQKLILGSCGLTAATCQDLASALIENQGLTHLSLSGDELGSKGM  
SLL-----  
-----CRAVKLSSCGLQKLALNACSLDVAGCGFLAFALMGNRHLTHLSLSMN  
PLEDPGMNLLCEVMPEPSCPLRDLVNCRLTASCKSLSNVITRSPRLRSLDLAANALG  
DEGIAALCEGLKQKN-TLTRLGLEACGLTSEGCKALSALTCSRHLASLNLNRNDLGPGRG  
MTTLCSAFMHPTSNLQTIIGLWKEQYPARVRRLLQVQRLKPHVVISDAWYTEEEEDGPCW  
RI-----  
-----  
-----

#NLRP5\_dog "gi|73947399|ref|XP\_533576.2| PREDICTED: similar to NACHT, LRR and PYD containing protein 5 [Canis familiaris]"

-----  
-----MREAKLPCFSNYGLQWYFKQLSKEEFQTFKELLMEKASEL  
AVCSFPE-----WVEVSNANVEHLASLLHEHYKESLAWKISIHIFEEMNLSTLSEKARK  
EMKKYSLTEIPE----NSTPKKNDQEPNMKEGPGQRKD-----  
-----VGNTWNYKDYVMT  
KFATKLD-----EYHGSENFASDYPEMQTLLGAFNPD-QRQGFQPR-TVVVHGGKSGIGKSD



LARRVLLSWAQGKLYQGMFSYVFFLGAREMH-CMKEGSFAELISREWPDYQVPMMDIMSQ  
PERLLFVVDGFDLDFAFKD----NDPNLCEDWTDKQPTSVLMHSLKLVLLPESLMIT  
VRDTGIEKLSMLTSPRYLLVRGISVEKRIQLLCQHTKNEH-----LKTQVLHSVV  
DNHLLFEECQAPILGSLICEALNLQEASGKSLPPTCQTLTGLYATFVFHQLTPRDASRRC  
LNQEERAILKNLCLMAMRGVWN-RKFVYRDDL SVHRLRKSELSALFQTNILLQDGS-HE  
RCYTF LHVSLQDFCAALYYILEGLETEWDPYPVF-----MENMRSLVELKQISSNAHL  
FQMKRFLFGLMSKEVMGALEVLGCPVPLVMKQGLLCWIS-LLGQQ-----  
-----ASTATPPDSLDAFHCLFETQDDEFVLLALNSFQ-----  
-EVWLPINRRMDLMVSS-FCLQRCQYLQKIRMDVCEFLKDEFTEAHP-LAPQGM-----  
----PIKTLADEWVESLCLVLSLTHPSLQQLDLGSLTNEWAMKTLCKIKLRQP-----TC  
KIQNLIFKGAQVTLGLRHLWMTLITNRNIKCLNLESTHLKD-EDLMMVCEALRHPNCLLE  
SLR-----LDHCGLTPACCLVISQILVTSISLKSLSLVGNKVTN  
QGKPLCDALTASQCTLQKMILGKCGLKAPDCQDLASALISNQLSLTHLCLSSNSLGSEGM  
NLL-----  
-----GRAIKFPNCGLQRLILNECNLDVAGCGFLAFALMGNRHLTHLSLSMN  
PLEDDGMNLLCEVIMEPSCHLQDLELVKCHLTAGCCKKLSHVIVRNKHLKSLDLAVNALG  
DDGVTALCEGLKHKRSLKRLGLEACGLTSGCCEVLASALLCSQRLTSLNLMRNDSPMG  
MTKLCPAFAQPTSNLQIIGLWKWEYPTQIRKLLKEVQLVKPQIVIGDDWYSFDEDDRYWW  
KS-----  
-----  
-----  
-----

#NLRP8\_dog "gi|73947401|ref|XP\_853947.1| PREDICTED: similar to NACHT, leucine  
rich repeat and PYD containing 8 [Canis familiaris]"

-----  
-----MSSASSTSPFENGVMVLYMYYLSKEELQTFKQLLVDERPRP  
GSVQIT-----WDQVKTARWGEVHLLMEYFPGRLAWDVTHDIFAKMNQMECLRVQM  
ELNDILPSLELEDSNPREMPVSLEEGE-----  
-----SDKIQEYKLYMID  
EYSMIRSKTTWPGNHMDFFYQDIERHERFLPCIFLPKRPQGRQPK-TVVLQGVSGVGKSS  
LAGKVMLEWAKNFYSHKFWYAFYFHCREVA-QVDEQSLSELI AHKW PRAQALMSKIMSK  
PDQLLLFDGFEVTLTLD----RPTDLSWDWSQKLPGSVLLTSLLSKIMLPEATLLIT  
LRFTSWRKLKPFKHPFITLTGFSMVEKVKYFRTYFRNKR-----EADALS FVM  
GNTILFSMCQVPVICWMVC SCLRQOMEKGVDLVQAYPNATAVVFVQYLSLFP TKAGS--L  
PSNTHQEQLRGLCYLAAEGMWN-MRWVFDKDFEQAKLDETAVATFLHVNIFRRVAG-DK  
DYAFADLSFQEFFAALLYVLCFPQRLRNFWVLD-----RVQIICLIAYPGRKKNHL  
AQMGFLFLGLLNEKCSLAAEKSFRCKLSLGNKKKLLKVAALPYEC-----  
-----GPPTLHHGIPQLFYCLHEIQEEAFVVSQILSDCQ-----  
-KAALIISRNKDMQASA-FCLKHCRHLRNLELTITLTITQLYALNPDPLOSTEPG-----  
-----SSNQCFLLWQDFCSVVRTHENLEVLAVTNTVMEADSVKVL SAALRHP-----GC  
KLQKLI FRRVNTSMLNEDLLQVLMENWYLRCLIEIQGTEVRC-EAMEFLCTALKYPQCYLQ  
CLR-----LEDCAVTPKSWVELARDLGSNRHLKTLMLRSCLET  
FG-----AYYLSLAQLERLLENCGLTVLSCKSLMSLMSNKMLTHLSLAENALKDEGA  
KQL-----  
-----CSALQHPMCPLQRLVLRNCALTS DCCQDMASALGKNKNLRS LLDLGFN  
SLKDDGVTLLFEALKKSEGLQILELERCLFTSLCCQAMASMLLHNQSLRYLDVSKNDIG  
LRGILLREAFQQHKWKKKVVLETKQNYAPDMVMRLEGPVAVKNE SLRIIQDWSADCWDEA  
RWME-----  
-----  
-----

#NLRP1a\_mouse "gi|51921281|ref|NP\_001004142.1| NLR family, pyrin domain  
containing 1A [Mus musculus]"

-----  
-----MEE-----SQSKQESSTKVAQHEGQEDVDPTFKTKKLMLEVELMKHRVQLERN

LKLR-----  
-----TFPGARTKQVKEALYPLLTWSSKSKNLFQNF TKLLLLFKKLCQ  
RG---SENLVRESWYPCVPEE---EAHMIDIQDLFGPNLGTQKKPQLV IIEGAAGIGKST  
LARLVKRAWKEGKLYRNDFFHVFFFSCRELA-QYEQLSLAELIVQGQEVPTAPIRQILSH  
PEKLLFILDGIDEPAWVLAD----QNPCLCHWSQTPVHTLLGSLGKSILPGASFLT  
TRTTALQKFIP SLEQPCQVEVLGFTLFRKKNFYKYFGKKK-----GGVTFTLVK  
SNSALLTLCEVPWVCWLVCTCLKKQMEQGGELSLTS-QTTTALCLKYLSLTIPG-----  
QHMRT--QLRDLCSLAAEGVCQ--RRTLFS ESDLCKQGLDEHAIASFLKIGVLQKQASSLS  
--YSAHLCLQEFAAMSYILDDSEERH-ADMKND-----RIVETLVERYGRQNLFE  
APTVRFLFGLLSKEELKIEKLFCSLHGK--TKLKLWHILGKSQPHQP-----  
-----PCLGLLHCLYENQDMELLTHVMHDLQGTIVPGPDDLAHTVLQ  
TNVKHLVIQTDMDLMVVTFCIKFCCHVRS LQLNRKVQQGHKFTAPGMVLYRWTPITDA--  
-----SWKIFFSNLKLARNLEELDLSGNPLSYAVHSLCTTLRKR-----GC  
QLKTLCTLPEDMNKAEVKNTEAKGSLGKAPGPRNDIFPFPPA----HCPYNQTSTSEHL  
PCR-----LVECGLTSTYCSLLASVLSARSSLTELDLQNLNDLGD  
GGVKMLCEGLRNPACNLSILWLDQASLSDQVIAELRTLEAKNPKLLISSTWKPHVMVPTM  
NMDKEEVGDSQALLKQQRQSGMVGWLLKEDNVKKIKQ NATN----TYAHTHTHTHAELV  
PLKTFHPCSPVSPGDKHMEPLGTEDEFWGP TGPVTTEVVDRENRNLYRVQLPMAGSYHCPS  
TGLHFVVTRAVTIEIEFCAWSQYLDKTP LQQSHMVVGPLFDIKAEQGAVTAVYLPHFVAL  
QEGIVDSSLFHVAFQEHGMVLETPARVEQHYAVLENP SFSPMGILLRMIPAVGHFIPIT  
STTLIYYHLYLEDVTFHLYLVPNDCSIRKAIDDEEMKFQFVRINKPPPVDALYLGSRIV  
SSSKL--VEIIPKELELCYRSPGESQLFSEIDIGHMDSEIKLQIKDKRHMNLKWEALLKP  
G----KISLRPETLRVEERDTKGAF LCSFPVSSLSL DAPSLLFHMDQHREQLVARVTSVD  
PLLDKHLGVLSEDSYEVVRSETTNQDKMRKLFSLRSWSWDCKDQFYQALKETHPHLVM  
DILEKLGGSVKS----

#NLRP1b\_mouse "gi|110665740|ref|NP\_001035786.1| NLR family, pyrin domain  
containing 1B [Mus musculus]"

-----  
-----  
-----MEQ-----SQPKKKSRTKVAQHEGQLNLNPTFKTRKRKEVELMKRRPKPEGH  
LKLG-----  
-----TIPKVHIKQKGETLDP--TWSRKRKNLVQKLTNLLLFEKLC  
RG---SENLIRKSWYSCEEEE---RGHMIEIQDLFGPNRGTHKKPQLV IIEGAAGIGKST  
LARQVKRAWKEGQLYRNHFQHVFFLSCRELA-QYEQLSLAELIAQGGQEVPTVPIRQILSH  
PKELLFILDGIDEPAWVLAD----QNPCLCHWSQRQPVHTLLGSLGKSILPGASFLT  
ARTTALQKIIPYVQPRRVEVLGFSKFEREVYFRKYFVKES-----DAIAAFRLVV  
SNPVLLTLCEVPWVCWLVCTCLKKQMEQGGELSLTS-QTTTALCLKYLSLTIPG-----  
QHMRT--QLRALCSLAAEGICQ--RRTLFS ESDLCKQGLAEDAIA TFLKIGILQKQASSLS  
--YSAHLCLQEFAVMSYILEDSDERC-DGMEFK-----RTVETLIEVYGRHTLCE  
EPTVHFVFLGVLNEQGMREMKKIFDCKLPLG--TELKMLKSTLG--NPTYQ-----  
-----HHLGLLHCLYESQEEVLLTYVLCNLH-LTGPDKNYMEATVSQ  
TNVKHLVIQTDMEMLMVVTFCIQFCCHVRS LRVNMKGQQGHKLTVA SMVLYRWTPITNA--  
-----SWKILFYNLKFNSNLEGLDLSGNPLSYSAVQYLCDAMIYP-----GC  
QLKTLW-----  
-----LVECGLTPTYCSLLASVLSACSSLRELDLQNLNDLCD  
DGV RMLCEGLRNRACNLRILRLDLYSLSAQVITELRTLEENNLK LHISSIWMPQMMVPTE  
NMDEEDILTSFKQQRQSS-----  
-----GANPMEILGTEEDFWGPIGPVATEVVYRERNLYRVQLPMAGSYHCPS  
TRLHFVVTRAVTIEIEFCAWSQFLDKTP LQQSHMVVGPLFDIKAEQGAVTAVYLPHFVSL  
KDTKASTDFDKVAHFQEHGMVLETPDRVKPGYTVLKNP SFSPMGVLRIPAAARHFIPIT  
SITLIYYRVNQE EVTLHLYLVPNDCTIQKAIDDEEMKFQFVRINKPPPVDNLFIGSRIV  
SGSEN--LEITPKELELCYRSSKEFQLFSEIYVGNMGSEIKLQIKNKKHMKLIWEALLKP  
G----DLRP-----ALPRIA QALKDAPSLLFHMDQHREQLVARVTSVD  
PLLDKHLGVLNEESYEAVRAENTNQDKMRKLFNLSRSWSRACKDLFYQALKETHPHLVM  
DLLEKSGGSVLSG----

#NLRP1c\_mouse "gi|85986637|ref|NP\_001034323.1| NLR family, pyrin domain  
containing 1C [Mus musculus]"

-----  
-----  
-----  
-----  
-----  
-----  
-----MYMKQKKNENLYSTQPSKGENLSQNFTNLLLSQKLCPC  
QG---SKTFARKSWHQCVPEE---RGHMIEIQDLFGQNLNKQEKAQLVVIVGAAGIGKST  
LARQVRNAWKEGQLYRDHFQHVFFFSCTELS-KSKQLSLAEFIAQGQEVPTAPIRQILSH  
PEELLFILDGIDEPAWVLKD---QDPELCLHWSQMOPVHTLLGSLLGKSILPGASFLIT  
ARTTALKKFI SNFKQPWQVEVLGFTMLERKNYFYKYFEKEI-----EAI AAFRLIK  
SNSVLLTLCEVPWVCCLVNCLKKQMDQGRVISLTS-QTTTALCLKYLSTIPG-----  
KHRRT--QLRALCSLAAEGIWK--RRTLFSSEDLCKQGLEEDAIATFLKIGVLKQASSLS  
--YSFAHLCLQEFAAMSYLEDESEGRH-GDMKIN-----RTVRILVKRYGRQNLFE  
APTVRFLFGLLSKEGFKEMQKVF SCKLSGK--SKLMIR-HILQKLQPHQP-----  
-----SCLGLLHCLYEKQEMELLTMMHDLRGTIMHGLINIAHTVLQ  
RNLKLNVIQTDMDLMVVTFFIRLCSHVRSLQLNRKGGQYKLMAPGMVLYRWTPITDS--  
-----SWKIFFFNLFKFTTNLEELDLSGNPLSYSAACSLCKALRHP-----GC  
QLKTLW-----  
-----LVECGLTSTYCSLLASVLSACSSLTELNRLNLYLGN  
RGVKLLCEGLRNPACNLSTLWLDVASLREEVITELRTLEAKNLKLLISRACKSHVIVPTK  
NMDKEEVGDSL DLLKQQRQSS-----  
-----GDKHMEPLGTDYDFWGSTGVPVATEVVDREERNLYRVQLPMAGSYHSPS  
TGLHFVVTRAVTIEIEFCAWSQYLDKTP LKHSHMVAGPLFDIKAEQGT VSAVYLSRFVSL  
QEGIVDSSLFHV AHFQEHGIIPRNTSKGGTALCSTGKPKLLPNGNSTENDSGCRTLHPHH  
FHHTDLLSPLSRGCHLSPLLGPQ-----  
-----  
-----  
-----

#NLRP1\_rat "gi|109488421|ref|XP\_340836.3| PREDICTED: similar to NACHT, leucine rich repeat and PYD containing 1 [Rattus norvegicus]"

-----MEE-----SQSKQESNTRVAQHGSQQDVPDPTFQTKRALEKERSKPRPRPLPR  
GTIP-----  
-----EIEYKRKETIS-----HTQSMEQKYLQNF TKLLLLQKCCP  
GG---SEKLVRESWHP CVPEE---GGHMIEIQDLFDPNLDTEKQPQLVIEGAAGIGKST  
LARQVKRAWDEGQLYRDRFQHVFFFSCRELA-QCKQLSLAELIAQGQEVPTAPTRQILSR  
PEKLLFILDGIDEPAWVLED---QNPELCVHWSQAQPVHTLLGSLLGKSILPEASLMLT  
ARTTALQKLVPSLGQPHRVEVLGFSSEFERKDYFYKYFAKER-----NTIIDFNLI  
SIPVLLTLCEVPWVCWLLCTCLEKMQQGEVLSLTS-QTTTALCLKYLSTIPG-----  
QHLST--QLRTLCSLAAEGICQ--RRTLFSKSDLCKQGLAEDAIATFLKIGVLQRQPSLS  
--YSFAHLCLQEFAAMSYLEDESEAH-GDMGND-----RTVETLVERYGRQNLFE  
APTVRFLGLLNTREMREMENIFACKFPWE--TKLKLQSIIG-EPFCQP-----  
-----CHLGLFHCLYENQEEELLTETMLCFP-LTASGPNHMEATVFQ  
TNVKRLVIQTDMEMLMVVTF CITFS-HVRSRLKKGKQGEYKLTAPAMVLYRWTPISEA--  
-----SWKVLF SNLKCTRNL EELDLSGNPLSYSAVRS LCTALRQP-----GC  
RLKTLW-----  
-----LVDCGLTSRCCSFLASMLS AHSRLAELDRLNDLGD  
NGVRQLCEGLRNPACNLSILRLDQASLSEQVITELRALETKNPKLFI SSTWMSHMTMPTE  
NTDGEESLTSSKQQQQSS-----  
-----GDKHMEPLGTD DDFWGPSGPVSTEVVDREERNLYRVRLPMAGSYHSPS  
TGLHFVVTRAVTIEIGFCAWSQFLHETPLQHSHMVAGPLFDIKAEHGAVTAVCLPHFVSL  
QEGKVDSSLFHV AHFQDHGMVLET PARVEPHFAVLENP SFSMPGVLLRMIPAVGHFIPIT  
SITLIYYRLYLEDITFHLYLVPNDCTIRKAIDEEELKFQFVRINKPPPVDALYVGSRYIV  
SSSKE--VEILPKELELCYRSPRESQLFSEIYVGNIGSGINLQLTDK KYMNIWEALLKP  
GDLRP-----ALPRMASAPKDAPALLHFVDQHREQLVARVTSVD  
PLLDKLGHLVLS EEDYETVRAEATNQDKMRKLFGRSRSWSWDCCKDHFYQALKETHPHLIM  
DLLEKSGGVS VRL-----

#NLRP1\_bovine "ENSBTAT00000027232 peptide:ENSBTAP00000027232  
pep:NOVEL\_protein\_coding"  
--MAGEARSLEDLEKKKQKLELRLWLPDEEPRQLQSPEVVHAQPEKPRSRKMTIILSV  
KEVQHECMAIHTKGFVNEQGACTKTLEETDLNSALYSSFSHSPAPNLESPSWPTSTKV  
LTFCKPKQPV--LNPLKWSSSPLIFASGYRKEDLSPSIYQG--FPSSPYHESPSQELPND  
PTSTAVLRA-----CEIPRHSCPEPREKEGPGTVWPLVETSGNSCTEILLLENINSQN  
GRDGIQPPLSLMPLL-----  
-----PPSTHLMFCFPCHRSRQRYQDQRRETPCSTWSWKNEDLHPKFMQLLLLHTPYH  
KD---YESLNRESWDHGVVEG---QGHLIEVRDLFGSDLGSQEGPHTVILHGVAGIGKST  
LARHIRRAWEEGQLYRNHFQHVYFNCRELA-TSKLTSLEELITKDQSTTVAPAGQIQSQ  
PEQLLFILDGLDELECVSEE----KRAELCLHRSQQQSVQTLGSLVEKTIPEASLLIT  
ARTAAQKQFIPSLKQPCWVEVLGFSSESRKDYFYEYFTEES-----QATRAFSVVE  
SNQALLTMCLTPLVSWLACTCLKQOMEAGEELSLKS-QTMTALYLRILAQAQA-----  
QPLGT--QLRGFCTLAAEGICQ-GKTLFSPGDLKKHGLDGVISATPLKMDVLQKHTPSLN  
--YSFIHLCFQEFFAAVVSFALGDIRDKS-DHPNST-----GSMEKLVEVYGINNLF  
APT VHF LSGLLSEQGAREMENIFQCKLSWE--RKRESLLRWAELELRR-----  
-----EHYSLQLFHCLYEIQDEEFLTQAMAHFQ-----  
--GMRVCIRTSMELLVFTFCIRFCSHVWRLQLNEGRQHPGACRPTD TVLLSWVPATEA--  
-----CWQVLCVSVLQVTGNLKELDL SRNILSRSAVQSLDEALRCP-----GC  
QLETLRLASCSLTAESCKDIASGLSTSQTLMQLELSFN TLLDAGAHLCCQGLRQPTCKLQ  
RLL-----LAGCGLTSGCCQDLASMLRVSPSLMELNLLQNDLDD  
LGVRLLCGELRHPSCQLICLWLDQTQLSEEVTKMLRALERQKPLLVSIGIWKPSLRILHE  
GPGGAEMS-DTSSLKRQRQASARQKNLKLAAALS-----APEGSSPQAA  
QVRLFCPSSPAPPEDEHME SLGTEDDLWGPTGPVATEAVDEERSLYRVHLP MAGFYHWP  
N TGLRFEVRGPVTVEIEFCAWDQFLNRNFPQRSWLAAGPLFDIKAEPGAVAAVFLPHFVAF  
RGNDVDISQFQVAHFKEEGMLLEKPARVTPCYAVLENP SFSPMGVLLRMVQTALRFIPIT  
STVLLYHYLQPEVTFHLYLIPSDCSIQKAIDNEEKMFQFVRIHKPPPLTPLYMGSRYIV  
SGSEK--LEIIPKELELCYRSPRESQLFSEFYVRHLRSGIRLQIRSKKDGTVVWEALVKP  
GDLRRAVTPVS-----PGLRA-----  
-----  
-----

#NLRP1\_dog "ENSCAFT00000024581 peptide:ENSCAFP00000022816  
pep:NOVEL\_protein\_coding"  
MACRVQWQLAWYLEMMGKEELKEFQLRLLLEQQFWGDPPHALRAQLGKARGLEVASRLVAQ  
YGEQQAWVLALRTWEEMGLSRLCAQSRAEAGLIPLSPG----SPMAPSMQSPNSPISTEV  
LRFIQDPRTR--NSGQPLPPLLNTSGHMMNEDPSSCKYQEGLPDSPEFQGSPhQESPSA  
PMP TAVLGG-----WEAPPQSPVPKGQEA PKAGWPVAGTSGNHNPGERNRSQTESPQ  
GRS-----  
-----VPYLYVPSFPPLAGITERYQHQRKKPYPTWSWEDKDLHQIFIQLLLLHQYP  
RG---HESLTKGRWHHGAEK---QGHLIEVEDLFGPGLGAQEEPQTVILHGVAGIGKST  
LARQIRTAWKEGQLYKDRFRHVYFNCRELA-RSETMSLTELITKAQAGPVLPAEQILSQ  
PGRLLFILDLDPEPRWVLGE---QESLHSSWSKQRPVHALLGSLGKTVLPEVSLLV  
T VRTALRRLVP SVGQLCWVEVLGFSSEGRREYFYKYFKNKS-----QATQAFSLVE  
LNPTLLTMCLVPLVSWLLCTCLKKQMQRGEELSLGSSQTTTALWLYYLSQALPA-----  
QLLGA--QLRGFCSLAAEGFWQ-GTNLLSRRDLRKHGFDEATISTFLKTGILRKHP SPLN  
--YHLAHRCLQEFFAAVSCV LGGEDGGS-PHPDSI-----RGAEKLLLEVYEGHDLFG  
APTTHFLFGLLSEQGEREMEA VQCKLPRE--RKRD-LLRWAEAGLWPRLS-----  
-----APQPCSLHLLHCLYEIQDEDL LTRAMAHFH-----  
--GRSMCVQTGVEFLVCTFCFKFC SHVKRLQLNESRWDGQAWRPS SVALFSWVPVTD A--  
-----CWQALFSTLRASGLKELDL SGNHLSHPAVQSLCKVLKFP-----CC  
HLETVRLAGCGLTAEGCS DLASALSASPALAELELSFNLLLDAGA QHL SRGLRQPACRLR  
RLL-----LAGCSLTSRCCGALASALST SPLLEL DLQONELGD  
VGVRLLCGGLGHP TCQLTLLWLDQTQLSEEMTQMLRALQEEKPLFVC SKWKPRATVPT E  
GLSRGETS-GTSSLKQQRQSGRKSNAVAQARQPSLDRESGA--DSCSAPFPERSCPQVG  
QVQLGRPPSPAAPWDLNTEPLRIGDGFWGPLGPVAPEWLAEDGSLYRVHLPVAGSYHWP  
D TGLRFEVRGPATIDIEFCVWDQHLPRAGLWHSWVAGPLFDIKAEPGAVATVCLPHFV  
DL QGSSVDTSLFYAAHLKDEGM LVETPARVEADHV VLENP SFSPIGVLLRTIHAALRFLP  
VTV CVLLYHHLRPGEVAFHLYLIPSDYSIRKAIDNEEKKFQFVQIHKPPPLASLYMGSRY  
TV SGSEK--LEIIPKELELCYRSPREPQLFSEFYVSHLGS GIRLQVRDKKDDTVVWEALVKP  
GDLRPVASLAP-----PAPAARFPPTDAPAWLHFVDRHREQLVARVTSVD

PVLDMLHGQVLSSEEQYERVRAEATTPSQMRKLF SFSRSWDRACKDQVYQALKEAHPHLM  
ELWEKWGGNSGKQAPP

#NLRP1\_human "gi|14719829|ref|NP\_127497.1| NLR family, pyrin domain containing 1 isoform 1 [Homo sapiens]"

MAGGAWGRLACYLEFLKKEELKEFQLLLANKAHSRSSSGETPAQPEKTS GMEVASYLVAQ  
YGEQRAWDLALHTWEQMGLRSLCAQAQEGAGHSPSFPYS----PSEPHLGSPSQPTSTAV  
LMPWIHELPA GCTQGSERRVLRQLPDTSGRRWREI SASLLYQALPSSPDHESPSQESPNA  
PTSTAVLGS-----WGSPPQPSLAPREQEAPGTQWPLDETS GIIYYTEIREREREKSEK  
GRPP-----WAA-----  
-----VVGTPPQAHTSLQPHHPWEP SVRESLCSTWPWKNE DFNQKFTQLLLLQRPH  
RS---QDPLVKRSWPDYVEEN---RGHLIEIRDLFGPGLDTQE-PRIVILQGAAGIGKST  
LARQVKEAWGRGQLYGDRFQHVYFSCRELA-QSKVVSLAELIGKDG TATPAPIRQILSR  
PERLLFILDGVDEPGWVLQE----P SSELCLHWSQPQPADALLG SLLGKTILPEASFLIT  
ARTTALQNLIP SLEQARWVEVLG FSESSRKEYFYRYFTDER-----QAIRAFRLVK  
SNKELWALCLVPWVSWLACTCLMQQMKRKEKLT LTS-KTTTTLCLHYLAQALQA-----  
QPLGP--QLRDLC SLAAEGIWQ-KKTLFSPDDL RKHGLDGAIISTFLKMGILQEHP IPLS  
--YSFIHLCFQE FFAAMS YVLEDEKGRG-KHSNCI-----IDLEKTLEAYGIHGLFG  
ASTTRFLLG LLSDEGEREMENIFHCRLSQG--RNLMQWVPSLQ LLLQP-----  
-----HSLESLHCLYETRNKTF LTQVMAHFE-----  
--EMGMCVETDMELLVCTFCIKFSRHVKKLQLIEGRQHRSTWSP TMVVLFRWVPVTD A--  
-----YWQILF SVLKVTRNLKELDLSGNLSHSAVKSLCKTLRRP-----RC  
LLETLRLAGCGLTAEDCKDLAFGLRANQTLTELDLSFNVLTDAGAKHLCQRLRQP SCKLQ  
RLQ-----LVSCGLTSDCCQDLASVLSASP SLKELDLQ QNNLDD  
VGVRLLC EGLRHPACKLIRLGLDQ T T L SDEM RQELRALEQEK PQLLIF SRRKPSVMTPTE  
GLDTGEMSNSTSSLKRQLRGLSERAASHVAQANLKL LDVSKIFPIAEIAEE----SSPEVV  
VELLCVPSPASQGD LHTKPLGTD DDFWGP TGPVATEVVDKEKNLYRVHFPVAGSYRWP N  
TGLCFVMREAVTVEIEFCVWDQFLG E INPQHSW MVAGPLLD IKAEPGAVEAVHLP HFVAL  
QGGHVDTS L FQMAHFKEEGMLLEKPARVELHHIVLENP SF SPLGVLLKMIHNALRFIPVT  
SVVLLYHRVHPEEVTFHLYLIPSDCSIRKAID DLEMKFQFVRIHKPPPLTPLYMGCRYTV  
SGSGSGMLEILPKELELCYRSPGEDQLFSEFYVGH LGS GIRLQVKDKKDETLVWEALVKP  
GDLMPATTLIP-----PARIAVP SPLDAPQLLHFVDQYREQLIARVTSVE  
VVDKHLHGQVLSQEYERVLAENTRPSQMRKLF SLSQSWDRKCKDGLYQALKETHPHLM  
ELWEKGSKKGLLPLSS-

#NLRP1\_chimpanzee "gi|114666001|ref|XP\_001167230.1| PREDICTED: death effector filament-forming Ced-4-like apoptosis protein isoform 8 [Pan troglodytes]"

MAGGAWGRLACYLEFLKKEELKEFQLLLANKAHSRSSSGETPAQPEKTS GMEVASYLVAQ  
YGEQRAWDLALHTWEQMGLRSLCTQAQEGAGHSPSFPYS----PSEPHLGSPSQPTSTAV  
LMPWIHELPA GCTQGSERRVLRQLPDTSGRRWREI SASLLYQALPSSPDHESPSQESPNA  
PTSTAVLGS-----WGSPPQPSLAPREQEAPGTQWPLDETS GIIYYTEIREREREKSEK  
GRPP-----WAA-----  
-----VVGTPPQAHASLQPHHPWEP SVRESLCSTWPWKNE DFNQKFTQLLLLQRPH  
RS---QDPLVKRSWPDYVEEN---RGHLIEIRDLFGPGLDTQE-PRVILQGAAGIGKST  
LARQVKEAWGRGQLYGDRFQHVYFSCRELA-QSKVVSLAELIGKDG TATPAPIRQILSR  
PERLLFILDGVDEPGWVLQE----P SSELCLHWSQPQPADALLG SLLGKTILPEASFLIT  
ARTTALQNLIP SLEQARWVEVLG FSESSRKEYFYKYFTDER-----QAIRAFRLVK  
SNKELWALCLVPWVSWLACTCLMQQMKQKEKLT LTS-KTTTTLCLHYLAQALQA-----  
QPLGP--QLRDLC SLAAEGIWQ-KKTLFSPDDL RKHGLDGAIISTLLKMGILQEHP IPLS  
--YSFIHLCFQE FFAAMS YVLEDKKGRG-KHSNCI-----IDLEKMLEAYGIHGLFG  
ASTTRFLLG LLSDEGEREMENIFHCRLSQG--RNLMQWVPSLQ LLLQP-----  
-----HSLESLHCLYETRNKTF LTQVMAHFE-----  
--EMGMCVETDMELLVCTFCIKFSHHVKKLQLIEGRQHRSTWSP TMVVLFRWVPVTD A--  
-----YWQILF SVLKVTRNLKELDLSGNLLSHSAVKSLCKTLRRP-----RC  
LLETLRLAGCGLRAEDCKDLAFGLRANQALTELDLSFNVLTDAGAKHLCQRLRQP SCKLQ  
RLQ-----LVSCGLTSDCCQDLASVLSASP SLKELDLQ QNNLDD  
VGVRLLC EGLRHPACKLIHLGLDQMTLSDEM RQELRALEQEK PQLLIF SRRQGETQTP TD  
GLEVSEPGNITGLQQP SDGSERAASHVAQANLKL LDVSKIFPIAEIAGKSHEESSPEVV  
VELLCVPSPASQGD LHMKPLGTD DDFWGP TGPVATEVVDKEKNLYRVHFPVAGSYRWP N  
TGLCFVVMREAVTVEIEFCVWDQFLG E INPQHSW MVAGPLLD IKAEPGAVEAVHLP HFVAL  
QGGHVDTS L FQVAHFKEEGMLLEKPARVELHHIVLENP SF SPLGVLLKMIHNALRFIPVT

SVVLLYHRLHPEEVTFHLYLIPSDCSIRKAIDDLEMKFQFVRIHKPPPLTPLYMGCRYTV  
SGSGSMLEILPKELELCYRSPGEDQLFSEFYVGHLSGIRLQVKDKKDETLVWEALVKP  
GRNTSQPNLR-----CNRDARR-----  
-----  
-----

#NLRP2\_human "gi|8923473|ref|NP\_060322.1| NLR family, pyrin domain containing 2  
[Homo sapiens]"  
-----  
-----

-----MVSSAQMGFNLQALLEQLSQDELSEKFKYLITTFSLAH  
ELQ-----KIPHKEVDKADGKQLVEILTTHCDSYVEMASLQVFEMHRMDLSEAKD  
EVRE-----AALKSFNKRKPLS  
LGITRKERPPLDVDEMLERFKTEAQAFTETKGNVICLGKEVFKG-----KKPDKDNRCRY  
ILKTKFREMWKSWPGDSK-EVQVMAERYKMLIPFSNPRVLPGPFYTVVLYGPAGLGKTT  
LAQKMLDWAE-DNLIHKFKYAFYLSCRELS-RLGPCSFAELVFRDWPELQDDIPHILAQ  
ARKILFVIDGFDELGAAP----GALIEDICGDWEKKKPVVLLGSLLNRVMLPKAALLVT  
TRPRALRDLRILAEPIYIRVEGFLEEDRRAYFLRHFGDED-----QAMRAFELMR  
SNAALFQLGSAPAVCWIVCTTLKLQMEKGEDPVPTCLTRTGLFLRFLCSRFP-----  
QGAQLRGALRTLSLLAAQGLWA-QTSVLHREDLERLGVQESDLRFLDGDILRQDRV-SK  
GCYSFIHLSFQQFLTALFYTLEKEEEEEDRDGHT-----WDIGDVQKLLSGVERLRNPDL  
IQAGYYSFGLANEKRAKELEATFGCRMSPDIKQELLRCDISCKG-----  
-----GHSTVTDLQELLGCLYESQEEELVKEVMAQFK-----  
-EISLHLN-AVDVVPSS-FCVKHCRNLQKMSLQVIKENLPENVTASESDAEVERS-----  
----QDDQHMLPFWTDLCSIFGSNKDLMGLAINDSFLSASLVRILCEQIASD-----TC  
HLQRVVFKNISPADAHRNLCALRGHKTVTYLTLOGNDQDD--MFPALCEVLRHPECNLR  
YLG-----LVSCSATTQQWADLSLAEVNQSLTCVNLSDNELLD  
EGAKLLYTTLRHPKCFLQRLSLENCHLTEANCKDLAAVLVVSRELTHLCLAKNP IGNTGV  
KFL-----  
-----CEGLRYPECKLQTLVLWNCIDITSDGCCDLTKLLQEKSSLLCLDLGLN  
HIGVKGMKFLCEALRKPLCNLRCLWLWGCSIPPFSCEDLCSALSCNQSLVTLDLGQNPLG  
SSGVKMLFETLTCSGTLRLRLKIDDFNDELNKLLEEIEEKNPQLIIDTEKHHPWAERP  
SSHDFMI-----  
-----  
-----

#NLRP2\_chimpanzee "gi|114679066|ref|XP\_001175071.1| PREDICTED: NACHT, leucine  
rich repeat and PYD containing 2 isoform 2 [Pan troglodytes]"  
-----  
-----

-----MVSSAQMGFNLQALLEQLSQDELSEKFKYLITTFSLAH  
ELQ-----KIPHKEVDKADGKQLVEILTSHCDSYVEMASLQVFEMHRMDLSEAKD  
EVRE-----AALKSFNKRKPLS  
LGITRKERPPLDVDEMLERLKTALDK-----DNRCRY  
ILKTKFREMWKSWPGDSK-EVQVMAERYKMLIPFSNPRVLPGPFYTVVLYGPAGLGKTT  
LAQKMLDWAE-DNLIHKFKYAFYLSCRELS-RLGPCSFAELVFRDWPELQDDIPHILAQ  
ARKILFVIDGFDELGAAP----GALIEDICGDWEKKKPVVLLGSLLNRVMLPKAALLVT  
TRPRALRDLRILAEPIYVRVEGFLEEDRRAYFLRHFGDED-----RAMRAFELMR  
SNADLFQGSAPAVCWIVCTTLKLQMEKGEDPVPTCLTRTGLFLRFLCSRFP-----  
QGAQLRGALRTLSLLAAQGLWA-QTSVLHREDLERLGVQESDLRFLDGDILRQDRV-SK  
GCYSFIHLSFQQFLTALFYALEKEEEEEDRDGHT-----SDIGDVQKLLSGVERLRNPDL  
IQAGYYSFGLANEKRAKELEATFGCRMSPDIKQELLRCDISCKG-----  
-----GHSTVTDLQELLGCLYESQEEELVKEVMAQFK-----  
-EISLHLN-AVDVVPSS-FCVKHCRNLQKMSLQVIKENLPENVTASESDAEVERS-----  
----QDDQHMLPFWTDLCSIFGSNKDLMGLAINDSFLSASLVRILCEQIASD-----TC  
HLQRVVFKNISPADAHRNLCALRGHKTVTYLTLOGNDQDD--MFPALCEVLRHPECNLR  
YLG-----LVSCSATTQQWADLSLAEVNQSLTCVNLSDNELLD  
EGAKLLYTTLRHPKCFLQRLSLENCHLTEANCKDLAAVLVVSRELTHLCLAKNP IGNTGV  
KFL-----

-----CEGLRYPECKLQTLVLWNC DITS DGCCDLAKLLQEKSSLSCLDLGLN  
HIGVKGMKFLCEALRKPLCNLRCLWLWGCSIPPFSCEDLCSALSCNQSLVTLDLGQNPLG  
SSGVKMLFETLTCS SGTLR LRLKIDDFNDELNKLLEEIEEKNPQLIIDTEKHHPWEERP  
SSHDFMI-----

#NLRP2\_mouse "gi|112821677|ref|NP\_808358.2| NACHT, leucine rich repeat and PYD  
containing 2 [Mus musculus]"

-----MEHFDPLGFNLKDVLRLKLDKTELNNFKRTLRSCLPD  
TMK-----QINKLTMDLANGAQLAEILTDHCP SAWIKRVTVQILEEINRVDLAE LVVK  
QIEE-----AVLKVPEEKVSSK  
PREPSGTLTFPWNFVQAKRPEDKQKE-----E  
WKTRYTAKWKQNFWPCKNKEIYVVTESYKTL LALCNP-KIETPFAHAIVLHGPPGSGKTT  
MAKQLMLEWSE-SKQAQIFSCAFYI SCREVN-NTKPCTFAHLLSMDNP SWRDCVIRDLIL  
GKEFLFVVDGFDLTFPAG----ALIRDLCGDWNTVKPVEVLLGSL LKRKMAPHATLLVT  
TRTQSLHQIFVMMDQPLL VETLGFLEQEKQEYFQKYFEDEEGEEEDKGEKALRALKEVR  
CNADLYQMASLPTACGIFCLCLELRMKGEDLSLTCQTYTSMFLNFLCEVFSSETCED-H  
LNEEFQILFKKICILAANSLE-QVPI LCEEDFLTKLNLN LHPMVCRHILFKDSS-ST  
HCLSFICLGIQQLLAAI IFVQELGQESKGVSKYS-----IQNMLSREARLKNPDL  
SGLLPFVFGLLNETRIQELKTTFGCQISTEVKRKFLECESGENKP-----  
-----LLLLMNMQEILSCLYESQEEGFVKEAMVLF-----  
-DISLHLKTSTDLIHAS-FCLKNSQNLQTM SLKVEKAVFPENVAALSTAKHQRS-----  
----PDEQRMLTFWTD FCDTFNSNKKLVFLDIHESFLNSSALEILCEKLP SA-----SC  
CLQKVVLKNI SPDDAYEKLC LIFNGYKTI SHLILQGGNLD S--MHSLCEVLKNPACNLK  
FLS-----LGSCSTAAQKWDDFFPVLKVNQSLIFLDLTDNSLLD  
KSALLCNIWKEPKCILQRV SLENCQLTEACKDLSSVLMVSRTLTHLSLANNKLGDNV  
KNL-----  
-----CESISCTECNLQTLVLWSCNITNAGCHYLSKMLKQTL SLKHLDLGLN  
RIGTKGAKFLCEALKNPKSKL KSLWLCGCSITPLNCQDFSETLRSNKSLNTLDLSQNVLG  
TDAIKTFCEALKLQICPLQMLRLKFDEAKPSIQNLIQEMKVSHPQLRISSDQVDLKNP--  
PLPHFIF-----

#NLRP2\_rat "gi|109461167|ref|XP\_001070923.1| PREDICTED: similar to NACHT,  
leucine rich repeat and PYD containing 2 [Rattus norvegicus]"

-----MEHSDQLGFNLKDVLKLDKTELNNFKSTLKSCLPQ  
TMK-----QISKLTMDLANGAQLAEILTDYCPNDWVKRVTFKILEEINRADLAE LVMK  
QVEE-----AASKASEEKVSSK  
PREPLKTSLFPQDFVQGD ERPEHKHKK-----E  
WRNMYTEKWKKNFWPKCNKEIYVDTESYRTLLTLCNP-KIEMPFAYTIVLHGPPGSGKTT  
MARRLMEWSE-SKQAQSFSCAFYI SCRKLN-NSKPCTFAHLLSMNPN SWRYYMIRRLVL  
SEQFLFVVDGFDLTFPAG----ALLRDI CGDWNTVKPVEVLLSLLMRKMEPHSTLLVT  
TQTQSLHQIYLMVDQPV LVETQGFLEPEKQEYFQQYFEDEEGEEEGEGEGKALRALKEVK  
CNEALFQMASLPAACGIFCLCLELGMKKGEDLALTCQTYTSMFLNFLCRVFLQEACDG-H  
LNKQLQILFKKICILAAD SLE-QVPI LCEEDFLK LKLNKLHPVVYRCIFLEDSS-CT  
NCLSFICLSIQQLLAAI IFVQELGQESKDVSKYS-----IQKMLSREARLKNPNL  
SGVLPFVFSLLNKTHIQELETIFGCQISMGV KRKFLECELGENKP-----  
-----FLLMLDQEIFSCLYESQEEEFVKEAMALFG-----  
-EVSLHLKTNMDLVHAS-FCLKNSQNLQTM FLKVEKAVFPENFATLESTAEDQRF-----  
----QDKKMLTLWTD FCDTFHSNEKLAFLEI HESFLNSSSLEILCEKLSSA-----PC  
HLQKVVLKNI SPDDAYEKLC LIFCGYETI SHLTLQGGKLD S--MLHSLCKVVKNPACNLK

FLS-----LGSCSTTAQKWDDFFPALKANQSLISLDLTDNNLLD  
KGVRLCNTWKQSKCILQRVSLENCHLTEVCKDLSSVLMVSQTLTHLSLAKNELGDNGV  
KKL-----  
-----CESLSFPKCKLQTLVLWSCNITSNGCHYLSKMLGQAPSLKHLDLGLN  
RIGTTGAKFLCEALKSPRSNLKSLWLCGCSI IPTNCKDFSEILRSNKSLNTLDLSQNVMG  
TDAVKIFCESLKLQICPLQTLRLKFDEANPSIQKLIQEMKESHQLSITSDQVDPKKKSH  
SFPHFIF-----  
-----  
-----

#NLRP2\_dog "ENSCAFT00000004144 peptide:ENSCAFP00000003831  
pep:NOVEL\_protein\_coding"  
-----  
-----

-----MEPSAQLGFNLQPLLEQFAQDELSSQFKSLLRPLSLQD  
ELQ-----HIPATEVEEADGKQLAEILINHCP SHWVEMVTIQIFDKMNRDLSERAKD  
ELRV-----KIMKRSNHRKPEE  
TWITRTELKCANLEEPPEHVEEKDSAFTQVQEEDVTNPEEAKEGLKGEKPGKQDKYISI  
LKEKVQMWKKNFWPGASENIHTVTQKYETLIPFCNPKMLAGPFPHTVVLHGPAGVGKTT  
LAKKMLDWTEDSLAQTCPTAFYLSCKALS-RKGMCSFIELLAQSAPDLQDALAQVLTQ  
AQKLLFVIDAFEELRVPSGV--EALVHDLCDVWKTQRPASTLLGSLLKRKLLPTAALLVT  
TRPEALRELRLMVEQPLFVEIEGLSECDRKAYFLRHFGEAA-----QALRAFHLMK  
SNATLFQMGAAAPAVCWVCTCKLQMDGEDPGPTCQTTTSLLLRFLCSQFAPAQGS--C  
LGLHLRSTLHALCLLATEGVWT-QTSVFDGHDLLRLGVHESDLHPFLNRNIILOKSRD-CE  
GCYCFHLHSVQQFLAAALYILGSQDHQDLPAGSPS----WDAGNVQRLLSKEEGLKNPYL  
APVGHFLFGLTNEKRARELGMTFGCLVSTKVKQELLECRVGSPE-----  
-----RPFSSVTDTKETLHCLYESQEEQLVKEAMVQVT-----  
-EVSLVFKDTSDIMHAS-FCLKHCESLQKMWLQIEKGMFLENDAVSESEDQADRS-----  
----QNDQHVLFPWIDFCSMFDSNKNLIFLDISQSFLSASSVRILCEKITS-----TH  
NLQKVVLNIFPADAYRNFCIAFGGHETLTHLTQNDQND--MLPILCEILRHPKCNLQ  
YLR-----LVSCSATTQWAHLSSSLKINQSLTCLNLTANELPD  
ESAKLLCTTLRHPKCFLQRLSLENCQLTEACCKELSSALIVNQLRTHLSLAKNTLGDDGV  
KLL-----  
-----CEGLSYPDCQLQMLVLWYCSITSGGCNHLSTLLQQNSNLTHLDLGLN  
HIGITGLKFLCEALKNPMCNLKLWLGCAITPFSSEILSSALGRNQSLVTLDLGQNSLG  
YSGIKMLCDTLKLHCSRLTLRLKIDESDPRIQKLLKEIQEYDPQLTIESDDQDPTNNRP  
SSHDFIF-----  
-----  
-----

#NLRP7\_human "gi|75709196|ref|NP\_996611.2| NACHT, leucine rich repeat and PYD  
containing 7 isoform 2 [Homo sapiens]"  
-----  
-----

-----MTSPQLEWTLQTLLEQLNEDELKSFKSLLWAFPLED  
VLQ-----KTPWSEVEEADGKKLAEILVNTSSENWIRNATVNIILEMNLTCLCKMAKA  
EMME-----DGQVQEIDNPELG  
DAEEDSELAKPGEKEGWR-----NS  
MEKQSLVWKNFTWQGDIDNFHDDVTLRNQRFIPFLNPRTPRKLTPTVTVVLHGPAGVGKTT  
LAKKMLDWTDCNLSPTLRYAFYLSCKELS-RMGPCSF AELISKDWPELQDDIPSI LAQ  
AQRILFVVDGLDELKVPP----GALIQDICGDWEKKKPVVLLGSLLKRKMLPRAALLVT  
TRPRALRDQLLAQQPIYVRVEGFLEEDRRAYFLRHFGEED-----QAMRAFELMR  
SNAALFQLGSAPAVCWIVCTTLKQMEKGEDPVPTCLTRTGLFLRFLCSRFP-----  
QGAQLRGALRTLSLLAAQGLWA-QMSVFHREDLERLGVQESDLRFLDGDILRQDRV-SK  
GCYSFIHLSFQFLTALFYALEKEEGEDRDGHA-----WDIGDVQKLLSGEERLKNPDL  
IQVGHFLFGLANEKRAKELEATFGCRMSPDIKQELLQCKAHLHAN-----  
-----KPLSVTDLKEVLGCLYESQEEELAKVVVAPFK-----



-EISIHILTNTSEVMHCS-FSLKHCQDLQKLSLQVAKGVFLENYMDFELDIEFERCTYLTIPNWARQDLRSLRLWTFDCSLFSSNSNLKFLEVKQSFLSDSSVRILCDHVTRS-----TC  
HLQKVEIKNVTPDTAYRDFCLAFIGKKTLLHLLTLAGHIEWERTMMLMLCDLLRNHKCNLQ  
YLR-----LGGHCATPEQWAEFFYVLKANQSLKHLRLSANVLLD  
EGAMLLYKTMTRPKHFLQMLSLENCRLTEASCKDLAAVLVVSCKLTHLCLAKNPIGDTGV  
KFL-----CEGLSYPDCKLQTLVLQOCSITKLGCRYLSEALQEACSLTNLDLSIN  
QIARG-----LWILCQALENPNCNLKHLRLKTYETNLEIKKLEEVKEKNPKLTIDCNASGATAPPC  
CDFFC-----  
-----  
-----  
-----  
-----

#NLRP7\_chimpanzee "gi|114678963|ref|XP\_512902.2| PREDICTED: NACHT, leucine rich repeat and PYD containing 7 [Pan troglodytes]"

-----MTSPQLEWTLQTLLEQLNEDELKSFKSLWAFPLED  
VLQ-----KTPWSEVEEADGKKLAEILVNTSSENWIRNATVNILEEMNLTELCKMAKA  
EMME-----DGQVQEIDNPELG  
DAEEDSELAKPGEKEGWR-----NS  
MEKQSSVWKNTFWQGDIDNFHDAVTLRNQRFIPFLNPRTPGKLTPTVTVLHGPAGVGKTT  
LAKKMLDWDTCNLSPVRYAFYLSCKELS-RMGPCSFANELISKDWPELQDDIPSILAQ  
AQRILFVVDGLDELKVPP----GALIQDICGDWEKKKPVVLLGSLKLRKMLPKAALLVT  
TRPRALRDLQLLAQQPIYVRVEGFLEEDRRAYFLRHFGDED-----QAMRAFELMR  
SNAALFQLGSAPAVCWIVCTTLKLQMEKGEDPVPTCLTRTGLFLRFLCSRFP-----  
QGAQLRGALRTLSLLAAQGLWA-QMSVFHREDLERLGVQESDLRFLDGDILRQDRV-SK  
GCYSFIP-----DL  
IQVGHFLFGLANENRAKELEATFGCRMSPDIKQELLRCKAHLHAN-----  
-----KLSVTDLREVLGCLYESQEEELAKVVVAPLK-----  
-EISIHILTNTSEVRHCS-FSLKHCQDLQKLSLQVAKGVFLENYMDFELDIEFERCTYLTIP  
PTWARQDLRSLRLWTFDCSLFSSNSNLKFLEVKQSFLSDSSVRILCDHVTRS-----TC  
HLQKVEIK-----NTLHLLTLAGHIEWERTMMLMLCDLLRNKCNLQ  
YLR-----L-----  
-----ENCRLTEASCKDLAAVLVVSCKLTHLCLAKNPIGDTGV  
KFL-----CEGSSYPDCKLQTLV-----  
-----  
-----  
-----  
-----  
-----

#NLRP3\_human "gi|34878693|ref|NP\_004886.3| NLR family, pyrin domain containing 3 isoform a [Homo sapiens]"

-----MKMASTRCKLARYLEDLEDVDLKKFKMHLEDYPPQK  
GCIPLPRG-----QTEKADHVLDLATLMIDFNNGEEKAWAMAVWIFAAINRRDLYEKAKR  
DE-----PKWGS-----NARVSNPTVICQEDSIEEE  
WMGLLEYLSRISICKMKKDYRKKYRKYVRSRFQCIEDRNARLGESVSLNKRYTRLRLIKE  
HRSQQEREQELLAIG--KTKTCESPVSPKMELLFDPDEHSEPVHTVVFQGAAGIGKTI  
LARKMMLD WASGTLYQDRFDYLFYIHCREVS-LVTQRSLGDLIMSCCPDPNPIHKIVRK  
PSRILFLMDGFDELQGFDE----HIGPLCTDWQKAERGDILLSSLRKLLPEASLLIT  
TRPVALEKLQHLLDHPRHVEILGFSEAKRKEYFFKYFSDEA-----QARAAFSLIQ  
ENEVLFMTCFIPLVCWIVCTGLKQOMESGKSLAQTSKTTTAVYVFFLSLLQPRGGS---  
QEHGLCAHLWGLCSLAADGIWN-QKILFEESDLRNHGLQKADVSAFLRMNLFQKEVD-CE

KFYSFIHMTFQEFFAAMYLLLEEEKEGRTN--VPGSRLKLP SRDVTVLL ENY GKF EKGYL  
IFVVRFLFGLVNQERTSYLEKKLSCKISQQIRLELLKWI EVKAKA-----  
-----KKLQIQPSQLELFYCLYEMQEEDFVQRAMDYFP-----  
-KIEIN-LSTRMDHMVSSFCIENCHRVESLSLGF LHNMPKEEEEEEEKE-----GRHLD--  
---MVQCVLPSSSHAACSHGLVNSHLTSSFCRG-----  
-----LFSVLSTSQSLTELDLSDNSLGD-PGMRVLCETLQHPGCNIR  
RLW-----LGRGCSHECCFDISLVLSSNQKLV ELDLSDNALGD  
FGIRLLCVGLKHLLCNLKKLWLVSCCLTSACCQDLASVLSTSHSLTRLYVGENALGDSGV  
AIL-----  
-----CEKAKNPQCNLQKGLVNSGLTSVCCSALSSVLSTNQNLTHLYLRGN  
TLGDKGIKLLCEGLLHPDCKLQVLELDNCNLTSHCCWDLSTLLTSSQSLRKLSLGNNDLG  
DLGVM MFCEVLKQQSCLLQNLGLSEMYFNYETKSALETLQEEKPELTVVFEP SW-----  
-----  
-----  
-----  
-----

#NLRP3\_chimpanzee "ENSPTRT0000004039 peptide:ENSPTRP0000003727  
pep:NOVEL\_protein\_coding"

-----MKMASTRCKLARYLEDLEDVDLKKFKMHLEDYPPQK  
GCIPLPRG-----QTEKADHVDLATLMIDFN GEEKAWAMAVWIFAAINRRDLYEKAKR  
DE-----PKWGS D-----NACVSNPTVICQEDSIEEE  
WMGLEYLRSRISICKMKKDYRKRYRKYVRSRFQCIEDRNARLGESVSLNKRYTRLRLIKE  
HRSQQEREQELLAIG--KTKACESPVSP IKMEMLFDPDDEHSEPVHTVVFQGAAGIGKTI  
LARKIMLDWALGTLYQDRFDYLFYIHCREV S-LVTQRSLGDLIMSCCPDPNPP IHKIVRK  
PSRILFLMDGFDELQGFDE----HIGPLCTDWQKAERGDILLSSLIRKLLPEASLLIT  
TRPVALEKLQHLLDHPRHVEILGFSEAKRKEYFFKYFSDEA-----QARAAFSLIQ  
QNEVLF TMCFIPLVCWIVCTGLKQ QMESGKSLAQT SKTTTAVYVFFLSLLQPRGGS---  
QEHRLCAHLWGLCSLAADGIWN-QKILFEESDLRNHGLQKADVSAFLRMNLFQKEVD-CE  
KFYSFIHMTFQEFFAAMYLLLEEEKEGRTN--VPGSRLKLP SRDVTVLL ENY GKF EKGYL  
IFVVRFLFGLVNQERTSYLEKKLSCKISQQIRLELLKWI EVKAKA-----  
-----KKLQIQPSQLELFYCLYEMQEEDFVQRAMDYFP-----  
-KIEIN-LSTRMDHMVSSFCIENCHRVESLSLGF LHNMPKEEEEEEEKE-----GRHPD--  
---MVQCVLPSSSHAACSHGLG-----  
-----RCGLSHECCFDISLVLSSNQKLV ELDLSDNALSD  
FGIRLLCVGLKHLLCNLKKLWLVN-----  
-----SGLTSVCCSALSSVLSTNPNLTHLYLRGN  
TLGDKGIKLLCEGLLHPDCKLQVLELDNCNLTSHCCGDLSTLLTSSQSLRKLSLGNNDLG  
DLGVM MFCEVLKQQSCLLQNLGLSEMYFNYETKSALETLQEEKPELTVVFEP SW-----  
-----  
-----  
-----  
-----

#NLRP3\_rat "gi|109488152|ref|XP\_220513.4| PREDICTED: similar to cold  
autoinflammatory syndrome 1 homolog [Rattus norvegicus]"

-----MMSVRCKLAQYLEDLEDVDLKKFKMHLEDYPPPEK  
GCVP IPRG-----QMEKADHLDLATLMIDFN GEEKAWGMAVWIFAAINRRDLWEKAKK  
DQ-----PEW NDA-----CTS NLSMVCQEDSLEEE  
WIGLLGYLSRISICKKKKDYCKIYRRHVRSRFYSIKDRNARLGESVDLNRRYTQLQLVKE  
HPSKQEREHELLTIG--RTKMWDRPMSSLKLELLFEP EDEHLEPVHTVVFQGAAGIGKTI  
LARKIMLDWALGKLFKDFDYLFYIHCREV S-LRAPKSLADLI I SCWPDNPPVCKILCK  
PSRILFLMDGFDELQGFDE----HIEEVCTDWQKAVRGDILLSSLIRKLLPKASLLIT

TRPVALEKQLHLLDHPRHVEILGFSEAKRKEYFFKYFSNEL-----QAREAFRLIQ  
ENEILFTMCFIPLVCWIVCTGLKQQMETGKSLAQTSKTTTAVYVFFLSLLQSRGGI---  
EEHLFSAYLPGLCSLAADGIWN-QKILFEECDLRKHGLQKTDVSAFLRMNVFQKEVD-CE  
RFYSFSHMTFQEFFAAMYLLLEEEEGVTVRKGPPEGCSDDLNRDVKVLLLENYGFKEGYL  
IFVVRFLFGLVNQERTSYLEKKLSCKISQQVRLELLKWIEVKAKA-----  
-----KKLQRPQSQLELFYCLYEMQEEDFVQSAMGHFP-----  
-KIEIN-LSTRMDHVVSFCIKNCHRVKTLGFLHNSPKEEEEKRG-----SQPLD--  
---QVQCVFPDPHVACSSRLVNCCLTSSFCRG-----  
-----LFSSLSTNQSLTELDLSDNTLGD-PGMRVLCEALQHPGCNIQ  
RLW-----LGRGCLTHQCCFNISVLSLSSQKLVELDLSDNALGD  
FGVRLLCVGLKHLNLCNLQKLWLVSCCLTSACCQDLALVLSNHSLTRLYIGENALGDSGV  
QVL-----  
-----CEKMKDPQCNLQKGLVNSGLTSLCCSALTSVLKTNQNLTHLYLRSN  
ALGDMGLKLLCEGLLHPDCKLQMLELDNCSLTSHSCWDLSTILTHNQSLRKLNLSNNDLG  
DLCVVTLCVGLKQGGCLLQSLQLGEMYLNCETKRTLEALQEEKPELTVVFEISW-----  
-----  
-----  
-----  
-----

#NLRP3\_mouse "gi|22003870|ref|NP\_665826.1| NLR family, pyrin domain containing 3  
[Mus musculus]"

-----MTSVRCKLAQYLEDLEDVDLKKFKMHLEDYPPEK  
GCIPVPRG-----QMEKADHLDLATLMIDFNNGEEKAWAMAVWIFAAINRRDLWEKAKK  
DQ-----PEWNDT-----CTSHSSMVCQEDSLEEE  
WMGLLGYSRISICKKKKDYCKMYRRHVRSRFYSIKDRNARLGESVDLNSRYTQLQLVKE  
HPSKQEREHELLTIG--RTKMRDSPMSSLKLELLFEPEDGHSEPVTVVFGAAGIGKTI  
LARKIMLDWALGKLFKDFDYLFYIHCREVSLRTPRSLADLIVSCWPDNPVCKILRK  
PSRILFLMDGFDELQGFDE----HIGEVCTDWQKAVRGDILLSSLIRKLLPKASLLIT  
TRPVALEKQLHLLDHPRHVEILGFSEAKRKEYFFKYFSNEL-----QAREAFRLIQ  
ENEVLFTMCFIPLVCWIVCTGLKQQMETGKSLAQTSKTTTAVYVFFLSLLQSRGGI---  
EEHLFSDYLQGLCSLAADGIWN-QKILFEECDLRKHGLQKTDVSAFLRMNVFQKEVD-CE  
RFYSFSHMTFQEFFAAMYLLLEEEAEGETVRKGPGGCSDDLNRDVKVLLLENYGFKEGYL  
IFVVRFLFGLVNQERTSYLEKKLSCKISQQVRLELLKWIEVKAKA-----  
-----KKLQWQPSQLELFYCLYEMQEEDFVQSAMDHFP-----  
-KIEIN-LSTRMDHVVSFCIKNCHRVKTLGFLHNSPKEEEEERG-----GRPLD--  
---QVQCVFPDTHVACSSRLVNCCLTSSFCRG-----  
-----LFSSLSTNRSLELDLSDNTLGD-PGMRVLCEALQHPGCNIQ  
RLW-----LGRGCLSHQCCFDISSVLSLSSQKLVELDLSDNALGD  
FGIRLLCVGLKHLNLCNLQKLWLVSCCLTSACCQDLALVLSNHSLTRLYIGENALGDSGV  
QVL-----  
-----CEKMKDPQCNLQKGLVNSGLTSLCCSALTSVLKTNQNFTHLYLRSN  
ALGDTGLRLLCEGLLHPDCKLQMLELDNCSLTSHSCWNLSTILTHNHSRKLNLGNNDLG  
DLCVVTLCVGLKQGGCLLQSLQLGEMYLNRKTRALEALQEEKPELTIVFEISW-----  
-----  
-----  
-----  
-----

#NLRP3\_dog "gi|73962271|ref|XP\_848377.1| PREDICTED: similar to Cold  
autoinflammatory syndrome 1 protein (Cryopyrin) (NACHT-, LRR- and PYD-containing  
protein 3) (PYRIN-containing APAF1-like protein 1) (Angiotensin/vasopressin  
receptor AII/AVP-like) isoform 3 [Canis familiaris]"

-----MASVRCKLARYLEDLEDADFKKFKMHLQDYPQK  
GFSPLPRS-----QTEKADHMDLATLMIDFNNGEEKAWAMAVWIFAAINRRDLYEKAKR

DE-----LEWGS-----CPRLYNHLECREESLEEE  
WMGLLGYLSRISICKKKKDYCKKYKHHVRSRFQCIKDRNARLGETVNLNKRYPTRLRLVKE  
HQSQQEREHELLAIGRTSAKTLDSPMSSVNVLELLFEPDDQHLEPVHTVVFQGSAGIGKTI  
LARKIMLDWASDKIYQDRFDYLFYIHCREVS-LGTRRSLGDLIVSCCPDPNPPICKIVSK  
PSRILFLMDGFDELQGFDE----HTEALCTNWQKVERGDILLSSLIRKRLPEASLLIT  
TRPVALEKLQHLLDRPRHVEILGFSEAKRKEYFFKYFSDEQ-----QATEAFRLIQ  
ENEILFTMCFIPLVCWIVCTGLKQQMDSGKNLAQTSKTTTSVYIFFLSSLLQSHRET---  
QKHQVSASLRGLCSLAADGIWN-QKILFDECDLRNHGLQKADVSAFLRMNLFQKEVD-CE  
KFYSFIHMTFQEFFAAMYLLLEEEEQGRMRN-LPWSSSKLPNRDVKVLENYGKFEKGYL  
IFVVRFLFGLVQERTSYLEKKLSCKISQKIRLELLKWIIEKAKG-----  
-----KNLQIQPSQLELFYCLYEMQEEDFVRKAMGHFP-----  
-KIEIS-LSTRMDHVSSFCIENCCRVESLSLRLHNSPKEEEEEEEEEENEKEMQHYD--  
---VDHCVLLDPHTTYAYRLVNCQVTVSLWQGL-----  
-----FVLSRNSLSLTELNLSDNALGD-QGVNVLCEMLQHPGCNIR  
KLW-----LGQCCLSYRCCFNISSVLSNNQKLEELDLSHNALGD  
FGIRLLCVGLKHLFCNLNKLWLVSCCLTPACCEDLASVLSTNQSLTRLYLGENSLEDAGV  
GVL-----CEKAKHPQCKLQRLGLVNSGLTPGCCPALASMLSTNQKLTHLYLRGN  
ALGDTGVKLLCEGLLHPNCKLQILELDGCSLTSHCCWDLSTLLTSSKSLRELSLGSNDLG  
DLGVMLLCEVLKQQGCILQSLKCEMYFNFDTKCALETLQEEKPELTIVFEPFGSDRSRL  
PDASVWAPCHLGVHKWERALLHPG-----  
-----  
-----  
-----

#NLRP3\_bovine "gi|76625172|ref|XP\_581687.2| PREDICTED: similar to cryopyrin [Bos taurus]"

-----MRMVSVRCKLARYLEDLEDIDFKKFKMHLEDYPSQK  
GCTSIPRG-----QTEKADHVLDLATLMIDFNNGEEKAWAMAKWIFAAINRRDLYEKAKR  
EE-----PEWGEWN-----EDKNANISVLSQEEESLEEE  
WMGLLGYLSRISICKKKKDYCKKYRKYVRSKRFQCIKDRNARLGEVNLNKRFRTRLRIKE  
HRSQQEREHELLAIGRTWAKIQDSPVSSVNLLELLFDPEDQHSEPVHTVVFQGAAGIGKTI  
LARKIMLDWASEKLYQDRFDYLFYIHCREVS-LGTQRSLGDLIASCCPGPNPPIGKIVSK  
PSRILFLMDGFDELQGFDE----HTEALCTNWRKVERGDILLSSLIRKRLPEASLLIT  
TRPVALEKLQHLLGQARHVEILGFSEARRKEYFLKYFSDEQ-----QAREAFRLIQ  
ENEILFTMCFIPLVCWIVCTGLKQQMDSGKSLARTSKTTTAVYIFFLSSLLQSQGGG---  
QENHNSATLWGLCSLAADGIWN-QKILFQECDLRNHGLQKADVSAFLRMNLFQKEVD-CE  
KFYSFIHMTFQEFFAAMYLLLEEDNHGEMRN-TPQACSKLPNRDVKVLENYGKFEKGYL  
IFVVRFLFGLINQERTSYLEKKLSCKISQKIRLELLKWIIEAKANA-----  
-----KTLQIEPSQLELFYCLYEMQEEDFVQRAMSHFP-----  
-KIEIK-LSTRMDHVSSFCIENCRHVESLSLRLHNSPKEEEEEEEE-----VRHSH--  
---MDRSVLSDFEVAYSQGLVNYLTSSICRG-----  
-----IFSVLSNNWNLTELNLSGNTLGD-PGMNVLCEMLQHPGCNIR  
RLW-----LGQCCLSHQCCFNISSVLSNNQKLVLELDLSHNALGD  
FGIRLLCVGLRHLFCNLKKLWLVSCCLTSASCEDLASVLSTNHSLTRLYLGENALGDSGV  
GIL-----CEKVKNPHCNLQKGLVNSGLTSGCCPALSSVLSTNQNLTHLYLQGN  
ALGDMGVKLLCEGLLHRNCKLQVLELDNCSLTSHCCWDLSTLLTNSQSLRKLCLGNNDLG  
DLGVMLLCEVLKQQGCLLKSRLCEMYFNFDTKRALETLQEEKPELTIVFEPFSR-----  
-----  
-----  
-----

#NLRP6\_chimpanzee "gi|114635347|ref|XP\_521701.2| PREDICTED: NACHT, leucine rich repeat and PYD containing 6 [Pan troglodytes]"

-----MDQPEAPCSSTGPR LAVARELLLAALEELSQEQLKRFRHKLRDVGPDG  
RS--IPWGR-----LERADAVDLAEQLAQFYGPEPALEVARKTLKRADARDVAAQLQE  
QRLQREFCAGGP-----  
-----SCLGRGWAALLPASRRSPGAVPAAARVKERNARSVKITKRFTKLLIAPESAA  
PEEEAL--GPAEEPEPGRARR----SDTHTFNRLFR-RDEEGRPLTVVLQGPAGIGKTM  
AAKKILYDWAAGKLYQGQVDFAFFLPCGELLERPGTRSLADLILDQCPDRGAPVPMQLAQ  
PQRLLFILDGADEL PALGGP----EAAPCTDPF-EAASGARVLGGLLSKALLPTALLLVT  
TRAAAPGR LQGRLCSPQCAEVRGFSDKD KKKYFYKFFRDER-----RAERAYRFVK  
ENETLFALCFVPFVCWIVCTVLRQQLELGRDLSRTS-KTTTSVYLLFITSVLSSAPVADG  
PRLQG--DLRNLCLAREGV LG-RAAQFAEKELEQLELRGSKVQTLF LSKKELPGVLETE  
VTYQFIDQSFQEF LAALS YLLEDGGVPR-TAAGGV-----GTL LRGD---TQPHSHL  
VLTRFLFGLLSAERMRDIQRHFGCMVSERVKQEALRWVQGGQ--GCPGVAPEVTEGAK  
GLEDTEPEEEEEEGEENYPLELLYCLYETQEDAFVVRQALCGLP-----  
ELALQVRVFCRMDVAVLSYCVRCCPAGQALRLISCR LVAAQEKKKSLGKRLQAS-----  
-----LGGSSSRGTTK-----QLPASLLHPLFQAMTDP-----LC  
HLSLTL SHCKLPDAVCRDLSEALRAAPALTELGLLHNRLSEAGLRMLSEGLAWPQCRVQ  
TVR-----VQLPDPQRGLQ-YLVSVLRQSPALTTLDLSGCQLPA  
PMVTYLCAVLQHQCGLQTL SVAQQPELPCPCRLVGVSSPSLPVRNETIPEAMAQAQR RP  
VSEIFGKGD-----  
-----  
-----  
-----  
-----  
-----  
-----  
-----

#NLRP6\_rat "gi|109459602|ref|XP\_577848.2| PREDICTED: similar to NACHT-, LRR- and  
PYD-containing protein 6 (PYRIN-containing APAF1-like protein 5-like)  
(Angiotensin II/vasopressin receptor) [Rattus norvegicus]"  
-----  
-----

-MCDPGGSGTGPIQVASVITLPIPSSEAVARELLLAALQDLSQEQLKRFRHKLRDAPLDG  
RS--IPWGR-----LEHSDAVDLTDKLI EFYAPEPAVDVTRKILKKADIRDVSLRLKE  
QQLQRLGSSSA-----  
-----LLTVSEYKKKYREHVLRQHAKVKERNARSVKINKRFTKLLIAPGSGA  
GEDELLG--TSGEPEPERARR----SDTHTFNRLFRGNDDEGPRPLTVVLQGPAGIGKTM  
AAKKILYDWAGGKLYHSQVDFAFFMPCGELLERPGTRSLADLILEQCPDR TAPVRRILAQ  
PHRLLFILDGADELPTLAAP----EATPCRD PF-EATSGLRVLSGLLSQELLPSARLLVT  
SRNATLGR LQGRLCSPQCAEVRGFSDKD KKKYFFKFFRDER-----KAERAYRFVK  
ENETLYALCFVPFVCWIVCTVLLQQMELGRDLSRTS-KTTTSVYLLFITSM LKSAGTN-G  
PRVQG--ELRMLCLAREGILK-HQAQFSEKDLERLKLQGSQVQTMFLSKKELPGVLETV  
VTYQFIDQSFQEF LAALS YLLDAEGAPG-NSAGSV-----QMLLNSD---AGLRGHL  
ALTRFLFGLLSTERIRDIGNHFGCVVPGRVKQD TLRWVQGSQPKVATVGA EKKDELKD  
EEAE EEEEEEEEEEEELNFGLELLYCLYETQEDDFVRQALSSLP-----  
EMVLERVRLTRMDLEVLSYCVQCCPDGQALRLVSCGLVAAKEKKKKKSFRR-----  
-----QPCSFSPSSSQSTGK-----QPPASLLRPLCEAMITQ-----QC  
GLSILTL SHCKLPDAVCRDLSEALKVAPSLRELGLLQNRLTEAGLRLLSQGLAWPKCKVQ  
TLR-----IQMPGLQEV IH-YLVIVLQQSPVLT TLDLSGCQLPG  
TVVEPLCSALKHPKCGKLTLSLTSVELTENPLRELQAVKTLKPD LAI IHSKLGTHPQLK  
G-----  
-----  
-----  
-----  
-----  
-----  
-----

#NLRP6\_human "gi|21264320|ref|NP\_612202.1| NLR family, pyrin domain containing 6 [Homo sapiens]"

-----  
-----MDQPEAPCSSTGPR LAVARELLLA ALEELSQEQLKRFRHKL RDVGP DG  
RS--IPWGR-----LERADAVDLAEQLAQFYGPEPALEVARKTLKRADARDVAAQLQE  
RRLQRLGLGSG-----  
-----TLLSVSEYKKKYREHVLQLHARVKERNARSVKITKRFTKLLIAPESAA  
P-EEAL--GPAEEPEPGRARR---SDTHTFNRLFR-RDEEGRRPLTVVLQGPAGIGKTM  
AAKKILYDWAAGKLYQGQVDFAFFMPCGELLERPGTRSLADLILDQCPDRGAPVPQMLAQ  
PQRLLFILDGADEL PALGGP----EAAPCTDPF-EAASGARVLGGLLSKALLPTALLLVT  
TRAAAPGRLQGR LRCSPQCAEVRGFS DKDKKKYFYKFFRDER-----RAERAYRFVK  
ENETL FALCFVPFVCWIVCTVLRQQLELGRDLSRTS-KTTTSVYLLFITSVLSSAPVADG  
PRLQG--DLRNLCLAREGV LG-RAQFAEKELEQLELRGSKVQTLF LSKKELPGVLETE  
VTYQFIDQSFQEF LAALS YLLEDGGVPR-TAAGGV-----GTLLRGD---AQPHSHL  
VLTTRFLFGLLSAERMRDIERHFGCMVSERVKQEALRWVQGGQ--GCPGVAPEVTEGAK  
GLEDTEEP EEEEEEGEEP NYPLELLYCLYETQEDAFVRQALCRFP-----  
ELALQVRVRCRMDVAVLSYCVRCCPAGQALRLISCR LVAAQEKKK KSLGKRLQAS-----  
-----LGGSSSQGTTK-----QLPASLLHPLFQAMTDP-----LC  
HLSSTL SHCKLPDAVCRDLSEALRAAPALTELGLLHNRLSEAGLRMLSEGLAWPQCRVQ  
TVR-----VQLPDPQRGLQ-YLVGMLRQSPALTTLDLSGCQLPA  
PMVTYLCAVLQHQCGLQTL SLASVELSEQSLQELQAVKRAKPD LVI THPALDGHPQPPK  
ELISTF-----  
-----  
-----  
-----  
-----  
-----  
-----  
-----

#NLRP6\_mouse "gi|124487067|ref|NP\_001074858.1| NLR family, pyrin domain containing 6 [Mus musculus]"

-----  
-----MDAAGASCSSVDAVARELLMATLEELSQEQLKRFRHKL RDAPLDG  
RS--IPWGR-----LERSDAVDLVDKLIEFYEPVPAVEMTRQVLKRSDIRDVASRLKQ  
QQLQKLGPTSV-----  
-----LLSVSAFKKKYREHVL RQHAKVKERNARSVKINKRFTKLLIAPGTGA  
VEDELLG--PLGEPEPERARR---SDTHTFNRLFRGNDEESSQPLTVVLQGPAGIGKTM  
AAKKILYDWAAGKLYHSQVDFAFFMPCGELLERPGKRS LADLVLDQCPDRAWPVKRI LAQ  
PNRLLFILDGADELPTLSS---EATPCKDPL-EATSGLRVLSGLLSQELLPGARLLVT  
TRHAATGRLQGR LRCSPQCAEIRGFS DKDKKKYFFKFFRDER-----KAERAYRFVK  
ENETL FALCFVPFVCWIVCTVLRQQLELGRDLSRTS-KTTTSVYLLFITSM LKSAGTN-G  
PRVQG--ELRTLCLAREGILDH HKAQFSEEDLEK LKLRGSQVQTI FLNKKEIPGV LKTE  
VTYQFIDQSFQEF LAALS YLLEAERTPG-TPAGGV-----QKLLNSD---AELRGHL  
ALTTRFLFGLLNTEGLRDIGNHFGCVVPDHVKKD TLRWVQGGSHPKGPPV GAKKTAELED  
IEDAE EEEEE---EDLNFGLELLYCLYETQEEDFVRQALSSLP-----  
EIVLERVRLTRMDLEVLNYCVQCCPDGQALRLVSCGLVAAKEKKK KSLVKRLKGSV--  
-----TG TNLVLSLYSSQSTKK-----QPPVSLLRPLCETMTTP-----KC  
HLSVLILSHCR LPDAVCRDLSEALKVAPALRELGLLQSRLTNTGLRLLCEGLAWPKCQVK  
TLR-----MQLPDLQEVIN-YLVIVLQQSPVLT TLDLSGCQLPG  
VIVEPLCAALKHPKCSLKTLSLTSVELSEN SLRDLQAVKTSKPDLSIIYSK-----  
-----  
-----  
-----  
-----  
-----  
-----  
-----

-----  
-----  
-----  
#NLRP6\_bovine "gi|119919524|ref|XP\_581339.3| PREDICTED: similar to PYRIN-  
containing APAF1-like protein 5 [Bos taurus]"

-----MGLGPAAGRACCLWSVCDP  
WSGCYSAGRPQRAEETGSDVCGQREATCVGGTRQELGAGKSEEATCPTLLCHFLLTACLT  
ATPAVLDLVIDSAGQLEASCSSMEPRAAAARELLLGALEDLSQEQLKRFHRHKLDRDVRVDG  
RS--IPWGR-----LERADTLDLVEQLVHFYGPERALDVAKKTTLKRADVRDVAARLKE  
RRLQSLGPSSP-----  
-----ALLSVSEYKKKYREHVLRQHAKVKERDARSVKINKRFTKLLIAEE---  
-----PEAERARR----SDTHTFNRLFG-RDEEGERRLTVALQGPAGIGKTM  
AARKILYDWAAGKLYHSQVDFAFFLSCRELLERPGTCSLADLILDQCPDREAPVQQMLAQ  
SERLLFILDGVDEMLAPEPA----EAAPCRDPH-EAASGARVLGSLLSKELLPAARLLVT  
RRGATPGRQLARLCSPOCAEVCVCFSDKDRKKYFYKFFQDEW-----KAEHAYRSVK  
ENEMFLSLCFVPGVCWIVCTVLRQQQLQRGQDLWRTS-KTTTAVYLLFVASVLRSAADA  
AQLQR--ELRKLCLACDGVLG-GRARFSEEDLERLQLCGSKVQTQFLSKKEMPGVLETE  
VTYQFIDQSFQEFALAALSILLEDEGAPR-APAGSI-----EALLQGD---PELRGHL  
NLTTTRFLFGLNTERMCEIKRHFVCTVSRVQKRVLRWVQDQGG--GRPRAAPEGTEEIL  
APQDTEE-SEEEEGEQLNYPLELLYCLHETQEDAFVHQALRGLP-----  
ELVLERVHFVSRMDLAVLSYCVRCCPAGQALRLVSCRLATAQEKKKSLMKRLQGS-----  
-----LGG-SSSRATTR-----KSPGSPRLRPLCEAMTDR-----QC  
GLNSLTLSRCKLPDSVCRDLSEALREAPALAEGLGFHNGLSEAGLRVLEGLASPQCRVQ  
TLR-----VQQPGLQEALQ-YMVGKLOQIPALTTLDLSGCQLSG  
PTVTCCLCTTLKCPGCHLQTLRLTSVELSEQALQELQAVETANPRLVITHPALDAHPKPPT  
VPISAL-----  
-----  
-----  
-----  
-----  
-----  
-----

-----  
-----  
-----  
#NLRP6\_dog "ENSCAFT00000010444 peptide:ENSCAFP00000009685  
pep:NOVEL\_protein\_coding"

-----  
-----  
-----  
-----MPPPEACCRKVRPTLAVARDLLQATFEDLNQEQLKRFHRHKLDRDATLDG  
RN--IPWGR-----LDGLDAMDALAAQLTHFYGPEPALDVTRKTLKRADMLDVAARLKE  
QQLQRLGPSSS-----  
-----TLRSVSEYKKKYRDHVLQQHAKVKERNARSVKINKRFTKLLIAREGAA  
LPDEALGCTKELEPEPQRARR----SDTHTFNRLFG-RDEEGQRPLTVVLQGPAGIGKTM  
AAKKILYDWAAGKLYHGQVDFAFFLPCRELLERPGACSLADLVLDQCPQRKAPLKPMLAR  
PERLLFILDGADDLPLAP----HAAPCTDPF-QAADAARVLGGLLGKTLTLLPAARLLVT  
ARTTAPGRLLDRLCSPQCAEVCVCFSDKDKKKYFHKFFRDER-----LAERAYRFVK  
ENETLFCALCFVPCWIVCTVLRQQLELGQDLRSRTS-KTTTAVYLLFIIISVLSSAPAADA  
PRMRA--ELRKLCLAREGTLG-HRAQFAEKDLERLELRGSKVQTLFSLKKEPGLVQTD  
VTYQFMDQSFQEFFSALSYLEEE-----RDLRAL---LQGESHL  
TLTTTRFLFGLNPNDRVSDMQRHFGVAVPERVKQDVLLWMQEQGQ--GRRRAAPEKTAGTD  
AAEDAEEPEEEEE--CEPNYPLELLYCLYETQEDAFVRQALRCLP-----  
ELELERVRLSRMDLVILSYCVRCCPPGQALRLVSCGLAPAQ-KKKKSLMKRLHSS-----  
-----LGGSSSSQASKR-----KPQPSPLRPLFEAMTDE-----HC  
GLNSLTLCRCKLPDSVCHDLSEALREAPALTELGLLHNQLSEAGLRVLEGLAWPQCRVQ  
KLR-----VQQPSLQEAPQ-YIISILRQS-VASTLYLGDCQLPG  
PVVTSLCAALQHPGCRLQTLTTLTSVELSKESLQAVKTAKPGLVIITHPALDSHPKPSK  
GLSDAL-----  
-----  
-----





KFM-----SEALKHPQCILQSLVLRCHFTSLSSESLSASLLHNKSLMHLDLGSN  
CLQDDGVKLLCDAFRHPCSLQDLELMGCVLTSACCLDLASAILNPNLQSLDLGNNDLR  
DDGVKFLFEALRHPNCNIQRLGLEHCGLTSLCCQDLSSTLSSNQGLIKISLTLNLTQCEE  
IMKLESEVLRSTECKLQVLGLCKEALDEEAQKLEAVASSNRLAVKQDCNDHEEEDGSWW  
RCF-----

#NLRP14\_dog "gi|73988784|ref|XP\_542482.2| PREDICTED: similar to NACHT, LRR and  
PYD containing protein 14 [Canis familiaris]"

-----MTDGSSSSFFPDFGLLLYLEELNKEELNKFKSFLKNETVEP  
RSCQIP-----WVEVKKAKREDLANLMKKYYPGEQAWDVALKIFGKMNLKDLKERATA  
EINWTARTMVTEGARTQEEQDDQEAQV-----SDGTEYRIQIKE  
KFRIMWDKKCLFGGPEDFHPGIAQEDRELLEHLFDVDVKTGEQPQ-TVVLQGAAGVGKTS  
LVRKAIVDWAEGLYQQKFSYVLYNAREIN-QLRERSFVQMI SKDWP STEGPIERIMTQ  
PSSLLFIIDSFDENLFAFEE---PDFVLCEDWTQVHPVSFLMSSLLRKVMLPESFLLVT  
TRLTACKKLP LLKNQHSVELLGM SKDARKEYIYQFFEDKK-----RASQVFSSLR  
SNEMLF SMCKVPLVCWAICTCLEQQIEMGGDVSLTCKTTTALFTRYISSLFPPVDGN--C  
PSLPNQTLKSLCHLAAKGVWT-MTSVFYREDLRKHGLTKSDVSIFLDMNILQKDTE-YE  
NCYVFTHLVQEF LAAMFYMLRDNWETRNNLFDS-----FEDLKLLLESKSS-KDPHL  
MQMKCFLFGLLNEDLLKQLETTLCRLSLEIKGKILQWLE-ILGNI-----  
-----KCFPAELEFLELFLCLYETQDEAFISQAMRSFQ-----  
-KVVIDVCGKVHLLVSS-FCLKHCQCLQTIKLSVTVVFEKTLNSSPPAEMCLEF-----  
-----SELI IHCWQDLC SVLHTNEHLRELDLCHSNLDELAMKTFYQELRHP-----NC  
KLQRLLMRFLSFPGGCQDIASSLTHNQNL MHLDLKGS DIGD-DGVKSLCEALKHPECKLQ  
NLS-----LESCGLTTLCCLNISKALIRSQSLRFLNLS TNHLLD  
DGVKLLCEALGHPKCHLERLSLESCGLTVAGCEDLSLALISNKRLTHLCLADN ILGDDGV  
KLV-----NDALKHPQCKLQSLVLRCHFTSLSSEHLSSALLCNKSLIHLDLGSN  
WIQDDGIKLLCDAFRHPCSNLQDLELMGCVLTSACCLDLASAILNNSHLQNL DLGHNDLR  
DDGVKILCEALRHPNCNIQRLGLEHCGLTSLCCQDLSYTLRSNQNL IKINLKQNTLGYEG  
MMKLCEVLKSPECKLKVLG-----

#NLRP14\_chimpanzee "gi|114635946|ref|XP\_521822.2| PREDICTED: NACHT, LRR and PYD  
containing protein 14 [Pan troglodytes]"

-----MADSSSSFFPDFGLLLYLEELNKEELNTFKLFLK-ETMEP  
EHGLTP-----WTEVKKARREDLANLMKKYYPGEKAWSVSLKIFGKMNLKDLKERAKE  
EINWSAQTIGPDDAKAGETQEDQEAQV-----GDGTEYRIRIKE  
KFCITWDKKS LAGKPEDFHGIAEKDRKLEHLFDVDVKTGEQPQ-IVVLQGAAGVGKTT  
LVRKAVLDWAEGLYQQRFKYVLYNGREIN-KLKERSFAQLISKDWP STEGPIEEIISQ  
PSSLLFIIDSFDENLFAFEE---PEFALCEDCTQEHVPSFLMSSLLRKVMLPEASLLVT  
TRLTTSKRLKQLLKNHYYVELLGMSEDAREEYIYQFFEDKR-----WAMKVFSSLK  
SNEMVFSMCQVPLVCWATCTCLKQOMEKGGDVTLTCQTTTALFTCYISSLFTPVDDG--S  
PSLPNQALRRLCQVAAGIWT-MTYVFYRENLRRLGLTKSDVSSFMDSNIIQKDAE-YE  
NCYVFTHLVQEFFAAMFYMLKGSWEAGNPSQP-----FEDLKSLQSTSY-KDPHL  
TQMKCFLFGLLNEDRVKQLERTFNCKMSLKI KSKLLQCME-VLGKS-----  
-----DYSPSQLGFLELFLHCLYETQDKAFISQAMRCFP-----  
-KVAINICEKIHLLVSS-FCLKHCRCRLRTIRLSVTVVFEKKILKTSLPANTWD-----  
-----GDRITHCWQDLC SVLHTNEHLRELDLCHSNLDKSAMN ILHHEL RHP-----NC

KLQKLLKFITFPDGCQDISTSLIHNKNLMHLDLKGSDIGD-NGVKSLEALKHPECKLQ  
TLR-----LESCNLTVFCCLNISNALIRSQSLIFLNLSTNNLLD  
DGVQLLCEALRHPKCYLERLSLESCGLTEAGCEYLSLALISNKRLTHLCLADNVLDGGV  
KLM-----  
-----SDALQHAQCTLKSLVLRCHFTSLSSEYLSTSLHKNKSLTHLDLGSN  
WLQDNGVKLLCDVFRHPSCNLQDLELMGCVLTNACCLDLASVILNPNLRSLDLGNNDLQ  
DDGVKILCDALRYPNCNIQRLGLECYCGLTSLCCQDLSSALICNKRLIKMNLQNTLGYEG  
IVKLYKVLKSPKCKLQVLGLCKEAFDEEAQKLEAVGVSNPHLI IKPDCNYHNEEDVSWW  
RCF-----  
-----  
-----

#NLRP14\_human "gi|28827813|ref|NP\_789792.1| NLR family, pyrin domain containing  
14 [Homo sapiens]"

-----MADSSSSSFFPDFGLLLYLEELNKEELNTFKLFLK-ETMEP  
EHGLTP-----WNEVKKARREDLANLMKKYYPGEKAWSVSLKIFGKMNLDLCERAKE  
EINWSAQITIGPDDAKAGETQEDQEAVL-----  
-----GDGTEYRNRIKE  
KFCITWDKSLAGKPEDFHHGIAEKDRKLEHLFDVDVKTGAQPQ-IVVLQGAAGVGKTT  
LVRKAMLDWAEGSLYQQRFKYVLYNGREIN-QLKERSFAQLISKDWPSTEGPIEEIMYQ  
PSSLLFIIDSFDELNFAFEE----PEFALCEDWTQEHVPSFLMSSLLRKVMLPEASLLVT  
TRLTTSKRLKQLLNHHYVELLGMSEDAREEYIYQFFEDKR-----WAMKVFSSLK  
SNEMLFSMCQVPLVCWAACCTCLKQQMEKGGDVTLCQTTTALFTCYISSLFTPVDGG--S  
PSLPNQAQLRRLCQVAAGIWT-MTYVIFYRENLRRLGLTQSDVSSFMDNSNI IQKDAE-YE  
NCYVFTHLHVQEFAAFMYMLKGSWEAGNPSCQP-----FEDLKSLLQSTSY-KDPHL  
TQMKCFLFGLLNEDRVKQLERTFNCKMSLKIKSKLLQCME-VLGNS-----  
-----DYSPSQLGFLELFHCLYETQDKAFISQAMRCFP-----  
-KVAINICEKIHLLVSS-FCLKHCRCLRTIRLSVTVVFEEKILKTSLPTNTWD-----  
-----GDRITHCWQDLCSVLHTNEHLRELDLYHSNLDKSAMNILLHELHRP-----NC  
KLQKLLKFITFPDGCQDISTSLIHNKNLMHLDLKGSDIGD-NGVKSLEALKHPECKLQ  
TLR-----LESCNLTVFCCLNISNALIRSQSLIFLNLSTNNLLD  
DGVQLLCEALRHPKCYLERLSLESCGLTEAGCEYLSLALISNKRLTHLCLADNVLDGGV  
KLM-----  
-----SDALQHAQCTLKSLVLRCHFTSLSSEYLSTSLHKNKSLTHLDLGSN  
WLQDNGVKLLCDVFRHPSCNLQDLELMGCVLTNACCLDLASVILNPNLRSLDLGNNDLQ  
DDGVKILCDALRYPNCNIQRLGLECYCGLTSLCCQDLSSALICNKRLIKMNLQNTLGYEG  
IVKLYKVLKSPKCKLQVLGLCKEAFDEEAQKLEAVGVSNPHLI IKPDCNYHNEEDVSWW  
WCF-----  
-----  
-----

#NLRP14\_mouse "gi|50872155|ref|NP\_001002894.1| NLR family, pyrin domain  
containing 14 [Mus musculus]"

-----MKTEDDEMEYEASKEETVSEDKDF-----  
-----DDGIDYRTVIKE  
NIFTMWYKTSLHGEFATLNCVITPKDQNLQHFDEDIQTSEAPQ-TVVLQGAAGIGKTT  
LLKKAVLEWADGNLYQQ-FTHVLYNGKEIS-QVKEKSFAQLISKHWPSSEGPIEQVLSK  
PSSLLFIIDSFDELDFSFEE----PQFALCKDWTQISPVSFLLISSLLRKVMLPESYLLVA  
TRSTAWKRLVPLLQKPQRVKLSGLSKNARMYIHHLLKDKA-----WATSAIYSLR  
MNWRLFHMCHVCHMCQMICAVLKGQVEKGRVEETCKTSTALFTYYICSLFPRIPIVG--C  
VTLPLNETLLRSLCKAAVEGIWT-MKHVLYQQNLRKHELTREDILLFLDAKVLOQDTE-YE  
NCYMFTHLHVQEFAALFYLLRENLEEQDYPSEP-----FENLYLLESNHI-HDPHL  
EQMKCFLFGLLNKDRVRQLEETFNLTISMEVREELLACLE-GLEKD-----

-----DSSLSQLRFQDLLHCIYETQDQEFITQALMYFQ-----  
-KIIVRVDEEPQLRIYS-FCLKHCHTLKTMRLTARADLNMLD---TAEMCLEG-----  
-----AAVQVIHYWQDLFVSLHTNESLIEMDLYESRLDESLMKILNEELSHP-----KC  
KLQKLI FRAVD FLNGCQDFT-FLASNKKVTHLDLKETDLGV-NGLKTLCEALKCKGCKLR  
VLR-----LASC DLNVARCQKLSNALQTNRSSVFLNLSLNNLSN  
DGVKSLCEVLENPNSSLERLALASCGLTKAGCKVLSSALT KSKRLTHLCLSDNVLEDEGI  
KLL-----  
-----SHTLKHPQCTLQSLVLRSCSFTP I GSEHLSTALLHNRS LVHLDLGQN  
KLADNGVKLLCHSLQPHCNLQELELMSCVLT SKACGDLASVLVNNNSLWSDLGHNILD  
DAGLNILCDALRNP NCHVQRLGLENCGLTPGCCQDLLGILSNNKSVIQMNL MKNALDHES  
IKNLCKVLRSP TCKMEFLALDKKEILKKKIKKFLVDVRINNP HLVIGPECPNTESGCWWN  
YF-----  
-----  
-----

#NLRP14\_rat

-----QKEGD  
GWSVRILT VKLKKFDHVCLWFSILTDL-----  
-----NYGIDYRTI I KE  
NFFI IWDKTSLLGESATLNCVTTHKDQKLEHIFDVNIQTSKSPQ-TVVLYGAAGIGKTT  
LLKKAVLEWADGNLYQQ-FTHVFYLSGREIS-QEKEKNFAQLISKHWPSSEGP I EQIL--  
-----  
-----QVEKGGNVEMTCQTSTALFTYYICSLFPRIAGS--S  
VTL PNETLLRS LCQA AVEGIWT-MKHVLYQQNLRKHELTREDLSLFL EANVLQQDTE-CE  
NCYTFTHLQVQEYFAALFYLLRENPEEKDHPLEP-----FENVHLLLESNHF-HD PHL  
EQMKCF LFGLLNKDRVQQLEETFNLTISR AVREELLVCLE-ALEKD-----  
-----DSPLSQLRIQDLLHCIYETQDEEFITQALTYFQ-----  
-KIMVKVDEESKLLIYS-YCLKHCHSLQTVRLTARADLRNMLDP--TAEICLRS-----  
-----VSVVFI SYVEDVWWTVNSKDNLIVCEHWCHWMYESFLLIS-EHLSHI-----VF  
SQMSLVFRAVCF LNSCYDFS-FLAFNNTVTHLDLKD TDLGD-NGVKTLCEALKYQGCKLR  
VLR-----LESCDLNVTHCQNL SKALQSNRSLVFLNLS TNSLSN  
DGVKSLCEVLENPNCP LERLALASCGLTKVGCEVLSSALT KTK-----  
-----SLIHLDLGFN  
KLADSGVKLLCQTLQQPNCNLQELE-----  
-----  
-----  
-----  
-----

#NLRP9a\_mouse "gi|115299743|ref|NP\_001041684.1| NACHT, LRR and PYD containing protein 9a isoform 1 [Mus musculus]"

-----MMDSSGYGLLQYLQKLSDEEFQRFKEHLRKEPEKF  
KLKPI S-----WTKIKNTSKEDLVMQLYTHYP-GKAWDMVLSLFLQVNREDLSTMAQT  
ERRD-----  
-----KQTKYKEFMKN  
TFQHIW TMETNTYIPDRSYHEFIEVQYRALQDIFDCESEP-----VTVVVSGSRGGGKTT  
FLRKAMLDWASRNLLQNRFYVYFVSVFLN-NITELSLAELISSTLPESSETVDDILSD  
PKRILFILDGFDYLFKFDLE----LR-TNLCNDWRK KLP IQIVLSSLLQKIMLPECSLLE  
LGNASLSNI IPLLQYPREI IMSGFSEQTIEIYCVSFFNTQ-----TGVEIFKNLK  
SIKPLFNLRCRPHLCWMI CSTIKWQYERREVASRFGRTLGLLYTIFMVSAFKSTYAR--N  
PSKQNRARIRT LCTLAVEGMWK-QVYVFDSDDLRRNGI SESDKKVWLRMKFLQNQG----

SNIVFYHSTLQWYFAVLFYFLQY-KDTRHPVIGN-----LAQLLGE-IYAHKQNQW  
FHTRILLFGMATEQVNSLLEPCFGCISSEKVRQEIIIRYIKSLSQQE-----  
-----CNEKLVVHPQNLFFCILDNQEERFVRQLMDRFE-----  
-EMTVDISDVDDMSATP-YCLHRAPKVKNLHLHIQKRVFLEIHDPEYGDLELFLK-----  
-----DQKLLAKHWTTLCTFLCN---LHVLDLDSCHFNEKAIEVLCNCLPLTSLVPLTGF  
KLHRLLCSTFTNFGDGLLFCFLHLP-HLKYMNLGYNLSN-DAVERLCSALKFSTCGVE  
ELL-----LGKCDISSEACGIIAASLIN-SEVKHLSLVENPLKN  
KGVMSLCEMLKDPSCVLESMLSYCCLTFIACGHLYEALLSNEHLSLLDLGSNFLEDTG  
V  
NLL-----  
-----CEALKDPNCTLKELWLPGCYLTSECCEEISAVLTCNTNLKTLKLGNN  
NIQDTGVRQLCEALCHPNCEMQLGLDMCDFTSDCCEDLALVLTTCNTLKSLLDWNADF  
HSGLEMLCKALNHKACNLEVLGLDKSLFSEESQTLQAVEKKNKLNKVLHFPWLKEELEK  
RGRVRLVWNSKN-----  
-----  
-----  
-----

#NLRP9b\_mouse "gi|52145307|ref|NP\_918947.2| NACHT, LRR and PYD containing protein 9b [Mus musculus]"

-----  
-----MAGSSGYGLLKLQKLSDEEFQRFKELLREEPEKF  
KLKPLS-----WTKIENSSKESLVTLLNTHYP-GQAWNMLSLFLQVNREDLSIMAQK  
KKRH-----  
-----KQTKYKFMKT  
TFERIWTLETNTHIPDRNYHLIVEVQYKALQEIFDSESEP-----VTAIVAGTTGEGKTT  
FLRKAMLDWASGVLLQNRQYVFFFVSVSLN-NTTELSLAELISSLPESETVDDILSD  
PKRILFILDGFDYLFKFDLE----LR-TNLCNDWRKRLPTQIVLSSLLQKIMLPGCSLLLE  
LGQISVPKIRHLLKYPRVITMGGFSERSVEFYCMSFFDNQ-----RGIEVAENLR  
NNE-VLHLCSNPYLCWFMFCCLKWQFDREEEGYFKAKTDAAFFTNFMVSAFKSTYAH--S  
PSKQNRARLKTCTLAVEGMWK-ELFVFDSEDLRRNGISESDKAVWLKMQFLQTHG----  
NHTVYHPTLQSYFAAMFYFLKQDKDICVPVIGS-----IPQLLGN-MYARGQTQW  
LQLGTFGLINEQVAALLQPCFGFIQPIYVRQEIICYFKCLGQQE-----  
-----CNEKLEERS-QTLFSLRDSQEERFVRQVVDLLE-----  
-EITVDISSSDVLSVTA-YALQKSSKLLKHLHIQKTVFSEIYCPDHCKTRTSIG-----  
-----KRRNTAEYWKTLGIFCN---LYVLDLDSQFNKRAIQDLCSMSPTPTVPLTAF  
KLQSLSCSFMADFGDGLFHTLLQLP-HLKYLNLYGTYLSM-DVTEKLCAALRCSACRVE  
ELL-----LGKCGISSKACGIIAISLIN-SKVHLSLVENPLKN  
KGVMSLCEMLKDPSCVLQSLMSYCCCLTFIACGHLYEALLSNKHLSSLLDLGSNFLEDTG  
V  
NLL-----  
-----CEALKDPNCTLKELWLPGCFLTSQCCEEISAVLICNRNLKTLKLGNN  
NIQDTGVRQLCEALSHPNCLNLECLGLDLCEFTSDCCDLALALTTCKTLNSLNLDDWKTLD  
HSGLVVLCEALNHKRCNLKMLGLDKSAFSEESQTLQDVEKNNNNLNILHHPWFEAERNK  
RGRVRLVWNSRN-----  
-----  
-----

#NLRP9c\_mouse "gi|110815824|ref|NP\_001036077.1| NLR family, pyrin domain containing 9C [Mus musculus]"

-----  
-----MVDSSSYGLLQYFQKLSDEEFQRFKELLQKEQEK  
KLKPLS-----WTKIKNTSKEDLVTQLYTHYP-RQVWDMVLNLFQVNRKDLSTMAQI  
ERRD-----  
-----KQNKYKEFMKN  
LFQYIWTSETNTYMPDRSYNTIIDRQYKALLDIFDSESDP-----ATAVVLGTRGKGT  
V  
FLRKAMLDWASGVLLQNRQYVFFFVSVSLN-NTTELSLAELISSKLPESLTDILSN  
PKRILFVLDGFDYLFKFDLE----LR-TNLCNDWRKRLPTQNVLSSLLQKIMLPECSSLLLE

LGESSCSKIIPLLQNPREIIMSGLSEQSIYFYCVSFFKIQ-----LGVEVFKDLK  
KNEPLFTLCSNPSMLWMICSSLMWGHYSREEVISSSESTSAIHTIFIMSAFKSIFGL--G  
SSKYKRFKLTCTLAVEGMWK-QVYVFDSEDLRRNKISESDKTVWLKMKFLQIQG----  
NNIMFYHSTLQWYFATLFYFLKQDKDTHYHPVIGS-----LPQLLGE-IYAHKQONQW  
THAQTFFFGIATKHVITLLKPCFGNISFKTIRQEIIIRYLKSLSQPE-----  
-----CNEKLVHP-KKLLFFCLIENQEERFVSQVMNLF-----  
-EITVDISDSDLGAAE-YSLLRASKLKNLHLHIQKKVFSEIHDPEYGSLENFKL-----  
-----DQKFSAINWTMLSILFCN---LHVLDLGSCHFNNKVVIEVLCNSLSPTPNMPLTVF  
KLQRLLCFMTNFGDGSFLCTFLQIP-QLKYLNLYGTDLSN-DVVEMLCSALKCSTCRVE  
ELL-----LGKCDISSEACGIMATFLIN-SKVKHLSLVENPLKN  
KGVMLCKMLKDPSCVLESMLSYCCLTFIACGHLYEALLSNKHLSLDLGNSFLEDIGV  
NLL-----  
-----CEALKYPNCTLKELWLPGCYLTSECCEEISAVLTCNKNLKTLLKLGNN  
NIQDTGVKRLCEALCHPKCKVQCLGLDMCELSNDCCEDLALALITCNTLKSLLNDWNALH  
HSGVLMCEALNHKKCKLNLMLGLDKSSFSEESQTFLQAVEKNNNLSLVHFPWVEDELKK  
RGVRLVWNSKN-----  
-----  
-----  
-----

#NLRP9b\_rat "gi|62639014|ref|XP\_218248.3| PREDICTED: similar to NACHT, LRR and  
PYD containing protein 9b [Rattus norvegicus]"

-----MVDTSYGILLKHLRKLSDGEFWSFKELLRKEPEKF  
KLKPIS-----WMKIENASKEELVMLLNTHYP-KQAWDMALSLFLQVNREDLSIMAQK  
KRRY-----  
-----KQTKYKKFMKT  
TFQSIWTLNESNICIPDRSYHLIVEHQYRKLQNIQFDSESEP-----VTAVVTGPTGEGKTV  
FLRKAMLDWASGILWQNRQYVFFFSVLSLN-NTTELSLAELISSKLPESSETLNDILSD  
PKKILFILDGFDYLFKFDLE----LR-TNLCNDWRKILPTQIILSSLLQKIMLPESLLE  
LGHISLPKIFPLLQYPRDITIQGFSECLKTYFISFFNTE-----KGIEVFENLK  
SNQ-MLKLCSNPYLCWMFCSCLKWQFDREEEAYFQAKTDSVFFTSFMVSAFKSAYAS--N  
PPKQNRQKLSLCTLAVEGMWK-QLFVFDSEDLRRNGISESDKAVWLRMKFLQNHD----  
NHIVFYHPTLQLYFASMFYFLKQDKDTHVPIGS-----IPQLLRK-IYARDHTQW  
LQIGIFLFGATEQVASLLKPYFGFIQHRDVRQEVRYLKSLSQRE-----  
-----CCEKLERP-QNLFACLRDNKEEFVREVVDLFE-----  
-EITVDITNSHVLIIA-NHLQKSSKLLKHLHIQKRVFLEIHDPEYSDSETFTQ-----  
-----DKNAAEYWKKLCHIFVN---LHVLDLDCSNFNKQVIEELCNVLSPPKIPMAF  
KLESLLCSFMTNFGDGSFLHTLLQLP-HLKYLNLYGTNLSN-SRIENLCSALRRSTCKVE  
ELL-----LGKCDISSEACGIATSLMN-SKVKHLSLVENPLKN  
KGVMSLCEMLKDPSCVLETMLSYCCLTFIACGHLYEALVSNKHLSLDLGNSFLEDIGV  
NLL-----  
-----CEALKDPNCILKELWLSGCFLTSECCEEISAVLTCNNNLKTLLKLGNN  
DIEDTGKHLCEALSHPNCKLECLGLDLCKFTSDCCEDLASALTCTKTLNLSNLDWKTLE  
HSGVVALCEALNHKKCNLMLGLDKSAFVSQTFLLQAVEKNNNLSILHYPWVEEERKK  
RGVRLVWNSKN-----  
-----  
-----  
-----

#NLRP9a\_rat "gi|34854707|ref|XP\_218250.2| PREDICTED: similar to NACHT, LRR and  
PYD containing protein 9b [Rattus norvegicus]"

-----MVDTSYGILLKHLRKLSDGEFWSFKELLRKEPEKF  
KLKPIS-----WMKIENASKEELVMLLNTHYP-KQAWDMALSLFLQVNREDLSIMAQK  
KRRY-----  
-----KQTKYKKFMKT



ELKPIP-----WAEKKASKEDVAKLLDKHYPGKQAWEVTLNLFLLQINRKDLWTKAQE  
EMRN-----  
-----KLNPYRKHMKE  
TFQLIWEKETCLHVPEHFYKETMKNEYKELNDAYTAAARR-----HTVVLEGPDGIGKTT  
LLRKVMLDWAEGNLWKDRFTFVFFLNVEYMN-SIAETSLELLSRDWPESEKIEDIFSQ  
PERILFIMDGFEQLKFNLQ----LK-ADLSDDWRQRQPMP IILSSLLQKKMLPESSLLIA  
LGKLAMQKHVFLMRHPKLIKLLGFSESEKKSIFSYFFGEEKS-----KALKVFNFVR  
DNGPLFILCHNPFTCWLVCVCVKQRLERGEDLEINSQNTSYLYASFLTTFVKAGSQS--F  
PPKVNRRARLKSALAAEGIWY-YTFVFSRGDLRRNGLSESEGVMWVGMRLLRG----  
DCFAMHLCIQEFCAAMFYLLKRPKDDPNPAIGS-----ITQLVRA-SVVQPQTLL  
TQVGIFMFGISTEEIVSMLETSGFPLSKDLKQEITQCLESLSQCE-----  
-----A-DREAIAFQELF IGLFETQEKEFVTKVMNFFE-----  
-EVFIYIGNIEHLVIAS-FCLKHCQHLLTTRMCVEN-----IFPDDSGCIS-----  
-----DYNEKLVYWRELCSMFITNKNFQILDMENTSLLDDPSLAILCKALAH-----VCK  
LR-KLFTS-VYFGHDELSEFKAVLHNP-HLKLLSLYGTSLSQ-SDIRHLCETLKHMPCKIE  
ELI-----LGKCDISSEACEDIASVLACNSKCLKHLSLVENPLRD  
EGMTLLCEALKHPHCALERLMLMG-----  
-----  
-----CFLTSDSCKDIAAVLICNEKLTCLKLGHN  
EIGDTGVRQLCAALQHPHCKLECLGLQTCPI TRACCGDLAAALIACKTLRSLNLDWIALD  
VDAVVVLCEALSHPDALQMLGLHKSGFDEETQKILMSVEEKIPHLTISHGPWIDEEYKI  
RGVLL-----  
-----  
-----

#NLRP10\_chimpanzee "ENSPTRT0000006299 peptide:ENSPTRP0000005809  
pep:KNOWN\_protein\_coding"

-----MAMAKARNPREALLWALSLEENDFKCLKFYLRDMTLSE  
GQPPLARGE-----LEGLIPVDLAELLI SKYGEKEAVKVVLLKGLKVMNLELVQLS-H  
ICLH-----  
-----DYREVYREHVYR-CLEEWQEA-----GVNGRYNQVLLVAKPSS  
ESPESLA-----CPIPEQE----LDSVTVEALFDSGEKPSLAPSLVVLQGSAGTGKTT  
LARKMVLWDATGTLYPGRFDYVYVSCKEVVLLLES-KLEQLLFWCCGDNQAPVTEILRQ  
PERLLFILDGFDELQRPFEE----KLKKR-----GLSPKESLLHLLIRRHTLPTCSLLIT  
TRPLALRNLEPLLKQARHVHILGFSEEERARYFSSYFTDEK-----QADRAFDIVQ  
KNDTLYKACQVPGICWVVCVSWLQGMERKGVVLETP-RNSTDIFMAYVSTFLPPDDGGC  
SELSRHRVLRSLCSLAAEQIHF-QRFLFEEAELRKHNLDGP-RLAAFLSSNDYQLGLAIK  
KFYSFRHISFQDFHFAMSYLVKEDQSRL-GKESRR-----EVQRLLLEVKEQEGNDEM  
TLTMQFLLDISKDSF SNLELKF CFRI SPCLAQDLKHFKEQMES-----  
-----MKHNRTWDLEFSLYEAKIKNLVKG IQMNNV-----  
SFKIKHSNEKKSQSQNLFSVKSSLSHGPKKEEQKCP SVHGQKEGKDNIAGTPKEAS-----  
-----TGKGRGTEE-----TPKNYI-----  
-----  
-----  
-----  
-----  
-----  
-----  
-----  
-----  
-----  
-----  
-----  
-----  
-----

#NLRP10\_human "gi|28827807|ref|NP\_789791.1| NLR family, pyrin domain containing  
10 [Homo sapiens]"







-----  
-----  
-----  
#NLRP12\_rat "gi|109458044|ref|XP\_218181.3| PREDICTED: similar to PYRIN-  
containing APAF1-like protein 7 isoform 2 [Rattus norvegicus]"  
-----

-----MLPATAKDALHRLSTYLEELEEAGELKKFKLYLG-IAEEL  
GQDKIPRG-----RMEMAGPLEMAQLMVAHMGTKAWLLALSTFERIHRKDLWERGQG  
EDLVRVTP-----SNGLCS  
LESQSTCLSDVSPDAPRKDPQITYKDYVRRKFRLMEDRNARLGECVNLSHRYTRLLLVKE  
HSNP IWAQQKLEETGWEHSRTRGHQASPIQMETLFEPEERPEPPRTVVVLQGAAGMGKSM  
LTHKVMLDWADGRLFQDFDYVFYISCRELNRSHTQCSVHDLSSCWPEHGAPLEDLIRA  
PDRLLFIIDGFHELHPSFHD----VQGPWCHCWEKRPTELLLGSLIRLLLLPQLSLIT  
TRPCALEKLHGLLEHPRHVEILGFSEAEREEFYRYFHNTG-----QASQVFSFMR  
DYEP LFTMCFVPMVSWVCTCLKQQLSEGELLRQTSRTTTAVYMFYLLSLMQPKPGT---  
PTFKVPANQRGLVSLAAEGLWN-QKILFEEEDLGKHGLDGAEVSTFLNVNIFQKGIK-CE  
KFYSFIHLSFQEFFTAMYCALHGRE-----AVRRALAEYGF SERNFL  
AHTVRF LFGLLNEEMRCYLERNLGTISPQVKEEALAWIQNKARS-----  
-----EGSTLQHGSLLELLSCLYEIQEEDFIQQALSHFQ-----  
-VVVVRNLSTKMEHVVCFCARYCRGTEVLHLYGSAYSTGAEDGPPPEPPGAQTQSTHS--  
---QERNILPDIYSAYLSATICNTSNLIELALYRNALGSQGVRLLCQGLRHA-----NCK  
LQNLRLKRCRCHISGSACQDLAAAI IANRNLI RLDLSGNSIGV-LGLELLCEGLQHMPCLRQ  
MIQ-----LRKCLLEAAAGRALASVLSNNSHLVELDLTGNPLED  
LGLKLLCQGLRHPVCLRLRTLWLKICHLGQASCEDLASTLKMNQSLMELDLGLNDLGDGSGA  
LLL-----  
-----CEGLRHPDCKLQTLRLGICRLGSDACAGVASVLQVNTCLRELDLSFN  
DLGDRGLWLLGEGLRHQTCRLQKLWLDSCGLTSKACEDLSSVLGISQTLNELYLTNNALG  
DTGVRLLCRRLRHPGCKLRVLWLFGM DLNKVTHRRMAALRVTKPYLDIGC-----  
-----  
-----  
-----

-----  
-----  
-----  
#NLRP12\_chimpanzee "gi|114678929|ref|XP\_524387.2| PREDICTED: PYRIN-containing  
APAF1-like protein 7 isoform 5 [Pan troglodytes]"  
-----

-----MLRTAGRDGLCRLSTNLEEELEAVELKKFKLYLG-TATEL  
GEGKIPWG-----RMKKAGPLEMAQLLITHFGEAEAWRLALSTFERINRKDLWERGQR  
EDLVRDTP-----PGGPS  
LGNQSTCLLEVSLVTPRKDPQETYRKYVRRKFRLMEDRNARLGECVNLSHRYTRLLLVKE  
HSNPMQAQQQLLDTGRGHARTVGHQASPIKIETLFEPEERPEPPRTVVVMQGAAGIGKSM  
LAHKVMLDWADGKLFQGRFDYLFYINCREMNSATECSMQDLISGCWPEPSAPLQELIRV  
PERLLFIIDGFDELKPSFHD----AQGPWCLCWEKRPTELLLNLSLIRKLLPELSLLIT  
TRPTALEKLHRLLEHPRHVEILGFSEAERKEYFYKYFHNAE-----QAGQVFNYVR  
DNEP LFTMCFVPLVCWVCTCLQQQLEGGGLLRQTSRTTTAVYMLYLLSLMQPKPGA---  
PRLQPPPNQRGLCSLAADGIWN-QKILFEEQDLRKHGLDGEDVSAFLNMNIFQKDMN-CE  
RYYSFIHLSFQEFFAAMYIILDEGERGAGPD-----QDVTRLLTEYAFSERSFL  
ALTSRFLFGLLNEETRSHLEKSLCWKVSPHIKMDLLQWIQSKAQS-----  
-----DGSTLQQGSLEFFSCLYEIQK-EFTQQALSHFQ-----  
-VIVVSNIAASKMEHMVSSFLKHC RSAQVLHLYGATYSADGEDRARC SAGHTLLVQL--  
---PERTVLLDAYSEHLAAALCTNPNI ELSLYRNALGSRGVKLLCQGLRHP-----NCK  
LQNLRLKRCRISSACEDLSAALIANKNLTRMDLSGNGVGF-PGMMLLCEGLRHPQCLRQ  
MIQ-----LRKQLESGACQEMASVLGTNPHLVELDLTGNALD  
LGLRLLCQGLRHPVCLRLRTLWLKICRLTAAACDELASTLSVNQSLRELDLSLNELGDLGV  
LLL-----  
-----CEGLRHPTCKLQTLRLGICRLGSAACEGLSVVLQANHNRELDLSFN  
DLGDWGLWLLAEGLQHPACRLQKLWLDSCGLTAKACKNLYFTLGINQTLTDLYLTNNALG

DTGVRLCKRLSHPGCKLRVLWLFGMDLNKMTHSRLAALRVTKPYLDIGC-----  
-----  
-----  
-----  
-----  
-----

#NLRP12\_dog "ENSCAFT00000004310 peptide:ENSCAFP00000003989  
pep:NOVEL\_protein\_coding"

-----MPRAPPSSGLCRLSAYLEELEAVELKFKLFLG-TEAEA  
G--RIPWG-----RLEAAGPLDTAQLLVAHCGPHAAWPLALGLFQRINRRDLWEKGRR  
EEPVRDTP-----SGDPSS  
PGSQSACSLEVFPALRRDPRETYRDYVRRKFRLMEDRNARLGECVNLSHRYTRLLLVKE  
HSNPMWAQQKLLDTGWGQARTVGHQASFIQMETLFEPDEERPEPPRTVVVLOGAAGMGKSM  
LAHKVMLDWADGRLFQDRFDYLFYINCRKMNQSTAEQSAQDLISSCWPEPSVPLQELVRV  
PERLLFIIDGFHELKPSFHD----PQGPWCLCWECKRPTTELLSSLIKRLKLLPELSVLIT  
IRPTALEKLRHLLHPRHVEILGFSEAERKEYFYKYFHNAE-----QAGQVFNFIR  
DNEPLFTLCFVPMVCWVCTCLKQQLLEDGGLLRQTSRTTTAVYMLYLLSLMQPKPGS---  
PILQSPPNQRGLCSLAADGLWN-QKILFEEQDLRKHGLDGDVSSFLNMNIFQKDIN-CE  
KFYSFIHLSFQEFAAMYIILDPGESRSSPE-----HNVTRLLAEYEFSEFSFL  
ALTVRFLFGLLNEETRSYLEKSLCWKVSPHVKVELLEWIQRKAQS-----  
-----EGSTLQQGSLELFSCLYEIQEEDFIQQALSPFQ-----  
-VVVNNIATKMEHMISFVCVKNCRSALVHLHGAAYSPDEDDGGRWASGPQMLPTQI--  
---PEKNVLPDAYSKQLAAALSTNPNLTELVLRSALGSRGVRLLCQGLRHP-----SCK  
LQNLRLKRCVASSACQDLAAALMANQNLRMDLSSNRLGL-PGLRALCKGLRHRPCKLQ  
VIQ-----LRKCQLEAEACQEIASVLSTSRHLEELDITGNALED  
LGLKLLCQGLRHPVCRLLQILWLKICHLTAAACEDLASTLGVNQSLIELDLSLNDLGDGPV  
LLL-----  
-----CEGLRHPQCRLQALRLGICRLSSAACKGLCTVLQVNPCLRDLDLDFN  
DLGDAGVWPLCEGLRHPTCRLQKLWLDSCGLTAKACEDLSSALGVSQTLRELYLTNNALG  
NAGVRLCKGLSHPGCKLQVLWLFGMELNKMTHRRLAALRVVVKPQLDIGC-----  
-----  
-----  
-----  
-----

#NLRP12\_human "gi|21955154|ref|NP\_653288.1| NLR family, pyrin domain containing  
12 isoform 2 [Homo sapiens]"

-----MLRTAGRDGLCRLSTYLEELEELEAVELKFKLYLG-TATEL  
GEGKIPWG-----SMEKAGPLEMAQLLITHFGEPEAWRLALSTFERINRKDLWERGQR  
EDLVRDTP-----PGGPSS  
LGNQSTCLLEVSLVTPRKDPQETRYRDYVRRKFRLMEDRNARLGECVNLSHRYTRLLLVKE  
HSNPMQVQQKLLDTGRGHARTVGHQASPIKIETLFEPDEERPEPPRTVVVMQGAAGIGKSM  
LAHKVMLDWADGKLFQGRFDYLFYINCREMNQSAATECSMQDLIFSCWPEPSAPLQELIRV  
PERLLFIIDGFDELKPSFHD----PQGPWCLCWECKRPTTELLNSLIKRLKLLPELSLLIT  
TRPTALEKLRHLLHPRHVEILGFSEAERKEYFYKYFHNAE-----QAGQVFNYVR  
DNEPLFTMCFVPLVCWVCTCLQQLLEGGGLLRQTSRTTTAVYMLYLLSLMQPKPGA---  
PRLQPPPQRGLCSLAADGLWN-QKILFEEQDLRKHGLDGEDVSAFLNMNIFQKDIN-CE  
RYYSFIHLSFQEFAAMYIILDEGEGGAGPD-----QDVTRLLTEYAFSEFSFL  
ALTSRFLFGLLNEETRSHLEKSLCWKVSPHIKMDLLQWIQSKAQS-----  
-----DGSTLQQGSLEFFSCLYEIQEEEFIQQALSHFQ-----  
-VIVVSNIAASKMEHMVSSFLKRCRSAQVLHLYGATYSADGEDRARCASAGAHTLLVQL--  
---PERTVLLDAYSEHLAAALCTNPNLIELSLYRNALGSRGVKLLCQGLRHP-----NCK  
LQNLRLKRCRISSACEDLSAALIANKNLTRMDLSGNGVGF-PGMMLLCEGLRHPQCRLQ  
MIQ-----LRKCQLESGACQEMASVLGTNPHLVELDITGNALED  
LGLRLLCQGLRHPVCRLLTLWLKICRLTAAACDELASTLSVNQSLRELDLSLNELGDLGV

LLL-----  
-----CEGLRHPTCKLQTLRLGICRLGSAACEGLSVVLQANHNLRELDLSFN  
DLGDWGLWLLAEGHQHPACRLQKLWLDSCGLTAKACENLYFTLGINQTLTDLYLTNNALG  
DTGVRLLCKRRLSHPGCKLRVLWLFGMDLNKMTHSRLAALRVTKPYLDIGC-----  
-----  
-----  
-----  
-----

#NLRP12\_mouse

-----MLPSTARDGLYRLSTYLEELEAGELKKFKLFLG-IAEDL  
SQDKIPWG-----RMEKAGPLEMAQLMVAHMGTTREAWLLALSTFQRIHRKDLWERGQG  
EDLVRVTP-----NNGLCL  
FESQSACPLDVSPNAPRKDLQTTYKDYVRRKFQLMEDRNARLGECVNLNRYTRLLLVKE  
HSNP IWTQQKFVDVEWERSRTRRHQTSPIQMETLFEPEERPEPPHTTVVLQGAAGMGKSM  
LAHKVMLDWADGRLFQGRFDYVFYISCRELNRSHTQCSVQDLISSCWPERGISLEDLMOA  
PDRLLFIIDGFDKLP SFHD---AQGPWCLCWEEKQPTVLLGSLIRRLLLPQVSLIT  
TRPCALEKLHGLLEHPRHVEILGFSEEARKEYFYRYFHNTG-----QASRVLSFLM  
DYEP LFTMCFVPMVSWVCTCLKQQLSEGLLRQTPRTTAVYMFYLLSLMQPKPGT---  
PTFKVPANQRGLVSLAAEGLWN-QKILFDEQDLGKHGLDGADVSTFLNVNIFQKGIK-CE  
KFYSFIHLSFQEFFAAMYCALNGRE-----AVRRALAEYGF SERNFL  
ALTVHFLFGLLNEEMRCYLERNLGSISPOVKEEVLAWIQNKAGS-----  
-----EGSTLQHGSLLELLSCLYEVEEDFIQQALSHFQ-----  
-VVVVRISITKMEHMVCSFCARYCRSTEVLHLHGSAYSTGMEDDPPEPSGVQTQSTYL--  
---QERNMLPDVYSAYLSAAVCTNSNLIELALYRNALGSQGVRLLCQGLRHA-----SCK  
LQNLR-----  
-----  
-----  
-----  
-----  
-----  
-----  
-----  
-----  
-----  
-----  
-----

#NLRP3\_chicken\_Q5F3J4

-----MAGEESTILLEALEG  
LTLEDFQEF-----KKKLPHTDIKGGWNIGRDELEKVTHPSSLISYMGDSYREGAAMD  
IAIS-----  
-----LFEEMNQRDLAEKILDEKVKEYKQKYTEHVAREFLQYKEANSCLGENLSV  
RDGYTNLTIARKSWDQHGDEPGDVSSDTVTQTLLLEPSKDGQVPPITVVLG-ASGMGKTM  
TIRKVMMEWVEG-TLCTQFDYVFCIDCKELS-FSKEVSMVDLISKCCPQQRMPAGRILGN  
PEKILFIFDSFEALGLPLAQ---PKDELSTDPTEAKPLETTLLSLLRRTVLPSSVLIA  
TRPAALQSLGQCLEGKHYVEILGFSPAAREEYFHRYFGNDN-----KADVAFRFTR  
GNEVLYSLCVIPVMSWTVCTVLERELYERNQLLACS-KTTTQMIMFYLSWLMKHRVSN  
QNLQQ--FLHKLCSLAADGIWK-HKVLFEKEIEEDQGLNQPQLLSLFLNEKGLEKGT  
NVYSFSLHLHLQELFAAMFYVLEDQDGMVSDSRILA-----KDVNMLLESYHTSRMDL  
NVTVRLLFGLVNPKSVEYAGEGIGCRISLQPRELLRWLQTRPRGTSHPRE-----  
-----VMKIEDLDTFHLLFETNEKS FVQSVLGSFTG-----  
-IALQDVKLTLYDQAALCFCIKQWAGLLSVTLRSCSFHQHHR-----  
-----QEPAKGLPRQSWRQEELHSPHPLCQALGHP-----GS  
SLQSLR-----  
-----LQWCGLTEGDSGALGTLATLPSLVHLELGDGALGD

DGVRMLCAGLRQPGCQLRVLR-----  
-----  
-----  
-----  
-----  
-----  
-----  
-----  
-----  
-----
