# Supplementary material for: Evolution and functional divergence of NLRP genes in mammalian reproductive systems
Source: PubMed Central journal article supplement (PMC2735741; doi:10.1186/1471-2148-9-202), 2009-08-14
Supplement: 1471-2148-9-202-S4.pdf [file 1471-2148-9-202-S4.pdf]

**Additional file 4: The mouse *VIR* sampling used for phylogeny**

| Gene Symbol   | Protein symbol | Genomic Location       | Protein Accession Number |
|---------------|----------------|------------------------|--------------------------|
| <i>Vlrj2</i>  | V1RJ2          | 7A1 (region I)         | NP_598987                |
| <i>Vlrj3</i>  | V1RJ3          | 7A1 (region I)         | NP_665846                |
| <i>Vlrk1</i>  | V1RK1          | 7A1 (region I)         | NP_598988                |
| <i>Vlrg1</i>  | V1RG1          | 7A1 (region I)         | NP_665842                |
| <i>Vlrg2</i>  | V1RG2          | 7A1 (region I)         | NP_598964                |
| <i>Vlrg5</i>  | V1RG5          | 7A1 (region I)         | NP_598967                |
| <i>Vlre9</i>  | V1RE9          | 7A1 (region II)        | NP_665841                |
| <i>Vlre10</i> | V1RE10         | 7A1 (region II)        | NP_598990                |
| <i>Vlre11</i> | V1RE11         | 7A1 (region IV)        | NP_598991                |
| <i>Vlre12</i> | V1RE12         | 7A3 (region III)       | NP_598992                |
| <i>Vlre13</i> | V1RE13         | 7A1 (region I)         | NP_665847                |
| <i>Vlrd1</i>  | V1RD1          | 7A1 (region IV)        | NP_109667                |
| <i>Vlrd2</i>  | V1RD2          | 7A1 (region IV)        | NP_109666                |
| <i>Vlrd4</i>  | V1RD4          | 7A1 (region IV)        | NP_109664                |
| <i>Vlrd6</i>  | V1RD6          | 7A1 (region IV)        | NP_109663                |
| <i>Vlrd9</i>  | V1RD9          | 7A3 (region III)       | NP_109660                |
| <i>Vlrd10</i> | V1RD10         | 7A1 (region IV)        | NP_997426                |
| <i>Vlrd13</i> | V1RD13         | 7A3 (region III and V) | NP_996751                |
| <i>Vlrd14</i> | V1RD14         | 7A3 (region III and V) | NP_109661                |
| <i>Vlrd15</i> | V1RD15         | 7A3 (region III and V) | NP_987074                |
| <i>Vlrd16</i> | V1RD16         | 7A3 (region III and V) | NP_996752                |
| <i>Vlrd18</i> | V1RD18         | 7A3 (region III and V) | NP_997501                |
| <i>Vlrd20</i> | V1RD20         | 7A3 (region III and V) | NP_997429                |
| <i>Vlrd21</i> | V1RD21         | 7A3 (region III and V) | NP_997430                |
| <i>Vlrd22</i> | V1RD22         | 7A3 (region III)       | NP_997431                |

The division of region I-V is described as in Figure 3.
